# Supplementary material for: Evaluation of Dietary Patterns and All-Cause Mortality: A Systematic Review
Source: PubMed Central journal article supplement (PMC8408672; doi:10.1001/jamanetworkopen.2021.22277), 2021-08-31
Supplement: jamanetwopen-e2122277-s001.pdf [file jamanetwopen-e2122277-s001.pdf]

## Supplemental Online Content

English LK, Ard JD, Bailey RL. Evaluation of dietary patterns and all-cause mortality: a systematic review. *JAMA Netw Open*. 2021;4(8):e2122277.  
doi:10.1001/jamanetworkopen.2021.22277

**eTable 1.** Description of All Dietary Patterns Examined in Relation to All-Cause Mortality Outcomes in All Included Articles

**eTable 2.** Results by All Included Articles for Dietary Pattern and All-Cause Mortality (ACM) Analyses

**eReferences.**

This supplemental material has been provided by the authors to give readers additional information about their work.

eTable 1. Description of All Dietary Patterns Examined in Relation to All-Cause Mortality Outcomes in All Included Articles<sup>a</sup>

| Source (country of origin)                         | Dietary pattern approach | Dietary pattern examined <sup>b</sup> | Foods, food groups, or other indicators of the dietary pattern examined <sup>c</sup>                                                                                                                                                                                                                                                                                                        |
|----------------------------------------------------|--------------------------|---------------------------------------|---------------------------------------------------------------------------------------------------------------------------------------------------------------------------------------------------------------------------------------------------------------------------------------------------------------------------------------------------------------------------------------------|
| Estruch et al, <sup>1</sup> 2018 (Spain)           | A priori (RCT)           | Control                               | Advice to reduce dietary fat                                                                                                                                                                                                                                                                                                                                                                |
|                                                    |                          | Mediterranean diet + EVOO             | Abundant olive oil, vegetables, fresh fruits and juices, legumes, fish or seafood, nuts, seeds; select white meat instead of red or processed meats; cook regularly with tomato, garlic, and onion; wine preferred (if consuming alcohol); ad libitum nuts, eggs, fish, seafood, low-fat cheese, chocolate, whole-grain cereals; add 15 L EVOO                                              |
|                                                    |                          | Mediterranean diet + nuts             | Abundant olive oil, vegetables, fresh fruits and juices, legumes, fish or seafood, nuts, seeds; select white meat instead of red or processed meats; cook regularly with tomato, garlic, and onion; wine preferred (if consuming alcohol); ad libitum nuts, eggs, fish, seafood, low-fat cheese, chocolate, whole-grain cereals; add 15 g/d walnuts, 7.5 g/d almonds, and 7.5 g/d hazelnuts |
| Abe et al, <sup>2</sup> 2020 (Japan)               | A priori                 | Japanese Diet Index                   | Positive: seaweeds, pickles, and green and yellow vegetables (green vegetables, carrot, pumpkin, and tomato), rice, fish (rawfish, fish boiled with soy, roast fish, boiled fish paste, and dried fish), beef and pork (beef, pork, ham, and sausage), miso soup, green tea, coffee                                                                                                         |
| Akbaraly et al, <sup>3</sup> 2011 (United Kingdom) | A priori                 | AHEI 2010                             | Positive: vegetables (not potatoes, french fries), fruits, nuts and soy protein, cereal fiber; white to red meat ratio; PUFA to SFA ratio; negative: trans UFA; neutral: alcohol                                                                                                                                                                                                            |
| Al Rifai et al, <sup>4</sup> 2018 (US)             | A priori                 | MDS                                   | Positive: vegetables, legumes, fruits, nuts, cereals, fish, MUFA/SFA; negative: red and processed meats, dairy products; neutral: alcohol                                                                                                                                                                                                                                                   |
| Atkins et al, <sup>5</sup> 2014 (UK)               | A priori                 | Elderly Dietary Index                 | Positive: vegetables, legumes, fruits, whole grain bread, cereals (including whole and refined grains), fish, dairy, and olive oil; negative: wine; neutral: meat                                                                                                                                                                                                                           |
| Baden et al, <sup>6</sup> 2019 (US)                | A priori                 | hPDI                                  | Positive: vegetables, legumes, fruits, whole grains, sugar-sweetened and artificially sweetened beverages, sweets and desserts, tea and coffee;                                                                                                                                                                                                                                             |

|                                                      |              |                        |                                                                                                                                                                                                                                                                                                                             |
|------------------------------------------------------|--------------|------------------------|-----------------------------------------------------------------------------------------------------------------------------------------------------------------------------------------------------------------------------------------------------------------------------------------------------------------------------|
|                                                      |              |                        | negative: potatoes, refined grains, fish or seafood, meats, fruit juices, eggs, miscellaneous animal foods, dairy, animal fat                                                                                                                                                                                               |
|                                                      |              | uPDI (reverse of hPDI) | Positive: vegetables, legumes, fruits, whole grains, sugar-sweetened and artificially sweetened beverages, sweets and desserts, tea and coffee; negative: potatoes, refined grains, fish or seafood, meats, fruit juices, eggs, miscellaneous animal foods, dairy, animal fat                                               |
|                                                      |              | PDI                    | Positive: vegetables, potatoes, legumes, fruits, fruit juices, nuts, whole grains, refined grains, tea and coffee, sugar-sweetened and artificially sweetened beverages, sweets and desserts; negative: fish or seafood, meats, eggs, miscellaneous animal foods, dairy, animal fat                                         |
| Behrens et al, <sup>7</sup> 2013 (US)                | A priori     | aMED                   | Positive: vegetables (not potatoes), legumes, fruits, nuts, whole grains, fish, MUFA/SFA; negative: red and processed meat. Removed alcohol as a positive component in moderation                                                                                                                                           |
| Bellavia et al, <sup>8</sup> 2016 (Sweden)           | A priori     | mMDS                   | Positive: vegetables and fruits (not potatoes and fruit juice), legumes and nuts, nonrefined high-fiber grains (whole meal bread, crisp bread, oatmeal, and bran of wheat), fish, fermented dairy products (cultured milk, yogurt, and cheese), olive oil, rapeseed oil; negative: red and processed meat; neutral: alcohol |
| Biesbroek et al, <sup>9</sup> 2017 (the Netherlands) | A priori     | DASH score             | Positive: vegetables (not potatoes and legumes), nuts and legumes, fruit and fruit juice, whole grains, low-fat dairy; negative: red and processed meat, sweetened beverages, sodium                                                                                                                                        |
|                                                      |              | DHD15-index            | Positive: vegetables, legumes, fruits, nuts, whole grains, fish, margarines, oils (replace butter, hard fats), tea, filtered coffee; negative: replace refined with whole-grain products, red meat, processed meat, alcohol, sodium; neutral: dairy products                                                                |
| Bittoni et al, <sup>10</sup> 2015 (US)               | A priori     | Healthy Eating Index   | Positive: vegetables, fruits, grains 6-11 servings/d = 10, variety; negative: meat, milk, total fat, SFA, cholesterol; neutral: sodium                                                                                                                                                                                      |
| Bo et al, <sup>11</sup> 2016 (Italy)                 | A priori     | MDS                    | Positive: vegetables, legumes, fruits, nuts, cereals, fish, MUFA/SFA; negative: red and processed meat, dairy products; neutral: alcohol                                                                                                                                                                                    |
| Boggs et al, <sup>12</sup> 2015 (US)                 | A priori     | DASH score             | Positive: vegetables (not potatoes and legumes), nuts and legumes, fruit and fruit juice, whole grains, low-fat dairy; negative: red and processed meat, sweetened beverages, sodium                                                                                                                                        |
|                                                      | A posteriori | Prudent <sup>d</sup>   | High intake of vegetables and fruits                                                                                                                                                                                                                                                                                        |

|                                                    |              |                                                    |                                                                                                                                                                                                                                                                                                         |
|----------------------------------------------------|--------------|----------------------------------------------------|---------------------------------------------------------------------------------------------------------------------------------------------------------------------------------------------------------------------------------------------------------------------------------------------------------|
|                                                    |              | Western <sup>d</sup>                               | High intake of red and processed meat and fried foods                                                                                                                                                                                                                                                   |
| Bonaccio et al, <sup>13</sup> 2018 (Italy)         | A priori     | MDS                                                | Positive: vegetables, legumes, fruits, nuts, cereals, fish, MUFA/SFA; negative: red and processed meat, dairy products; neutral: alcohol                                                                                                                                                                |
| Bongard et al, <sup>14</sup> 2016 (France)         | A priori     | Programme National Nutrition Santé Guideline Score | Positive: vegetables and fruits, seafood, vegetable fat; negative: sweetened foods, soda (drink water), added fat, salt; neutral: bread, cereals, potatoes, legumes, meat and poultry, seafood, eggs, milk and dairy products, alcohol                                                                  |
| Booth et al, <sup>15</sup> 2016 (US)               | A priori     | MDS                                                | Positive: vegetables, legumes, fruits, nuts, cereals, fish, MUFA/SFA; negative: red and processed meat, dairy products; neutral: alcohol                                                                                                                                                                |
| Brown et al, <sup>16</sup> 2016 (US)               | A priori     | HEI                                                | Positive: vegetables, fruits, grains 6-11 servings/d = 10, variety; negative: meat, milk, total fat, SFA, cholesterol; neutral: sodium                                                                                                                                                                  |
| Buckland et al, <sup>17</sup> 2011 (Spain)         | A priori     | arMED                                              | Positive: vegetables (not potatoes), legumes, fruits, nuts and seeds (not juices), whole grains, refined flour, pasta, rice, bread, grains, fish, olive oil; negative: total and processed meat; neutral: alcohol                                                                                       |
| Cárdenas-Fuentes et al, <sup>18</sup> 2019 (Spain) | A priori     | MEDAS                                              | Positive: vegetables, dishes with tomato sauce (tomato, garlic, onion, leek, and olive oil), pulses, fruits, nuts, fish, white meat over red meat, olive oil (olive oil as principal cooking fat), red wine; negative: commercial pastries, red meat or sausages, animal fat, sugar-sweetened beverages |
| Chan et al, <sup>19</sup> 2019 (Hong Kong, China)  | A priori     | DQI-I                                              | Positive: vegetables, fruits, cereals, PUFA/SFA, protein, calcium, iron, vitamin C; negative component: total fat, SFA, cholesterol, sodium, empty-energy foods; neutral: carbohydrate to protein to fat ratio                                                                                          |
|                                                    |              | MDS                                                | Positive: vegetables, legumes, fruits, nuts, cereals, fish, MUFA/SFA; negative: red and processed meat, dairy products; neutral: alcohol                                                                                                                                                                |
|                                                    |              | MIND diet                                          | Positive: green leafy vegetables, vegetables, beans, berries, nuts, whole grains, seafood, poultry, olive oil, wine; negative: red meat, cheese, pastries and sweets, butter and stick margarine, fried/fast food                                                                                       |
|                                                    |              | Okinawan Diet Score                                | Positive: legumes, sweet potatoes, rice, wheat, barley, other grains; negative: potatoes, fruits, nuts and seeds, fish, meat (including poultry), eggs, dairy, sugars, oils, flavors and alcohol; neutral: other vegetables, pickled vegetables                                                         |
|                                                    | A posteriori | Vegetable-fruits pattern <sup>d</sup>              | Data NR                                                                                                                                                                                                                                                                                                 |

|                                               |          |                                                   |                                                                                                                                                                                                                                                                                                                                                        |
|-----------------------------------------------|----------|---------------------------------------------------|--------------------------------------------------------------------------------------------------------------------------------------------------------------------------------------------------------------------------------------------------------------------------------------------------------------------------------------------------------|
|                                               |          | Snacks-drinks-milk products' pattern <sup>d</sup> | Data NR                                                                                                                                                                                                                                                                                                                                                |
|                                               |          | Meat-fish pattern <sup>d</sup>                    | Data NR                                                                                                                                                                                                                                                                                                                                                |
| Cheng et al, <sup>20</sup> 2018 (US)          | A priori | aMED and mMDS                                     | Positive: vegetables, legumes, fruits, nuts 1-5 by quintiles, whole grains, fish, MUFA/SFA; negative: red and processed meat; neutral: alcohol                                                                                                                                                                                                         |
|                                               |          | Evolutionary-concordance diet score               | Positive: vegetables, fruit and vegetable diversity, fruits, nuts, fish, lean meat, calcium (from nondairy foods); negative: grains and starches, baked goods, red and processed meat, dairy foods, alcohol, sodium                                                                                                                                    |
| Chrysohoou et al, <sup>21</sup> 2016 (Greece) | A priori | MedDietScore                                      | Positive: vegetables, potatoes, legumes, fruits, whole grains, fish, olive oil; negative: red and processed meat, poultry, full-fat dairy, alcohol                                                                                                                                                                                                     |
| Cuenca-García et al, <sup>22</sup> 2014 (US)  | A priori | MDS                                               | Positive: vegetables, legumes, fruits, nuts, cereals, fish, MUFA/SFA; negative: red and processed meat, dairy products; neutral: alcohol                                                                                                                                                                                                               |
|                                               |          | Ideal Diet Index                                  | Positive: vegetables and fruits, legumes, nuts, seeds, whole grains, fish; negative: processed meat, added sugar, SFA, sodium                                                                                                                                                                                                                          |
|                                               |          | DQI                                               | Positive: vegetables and fruits, breads, cereal, legumes, calcium; negative: total fat, SFA, cholesterol, protein, sodium                                                                                                                                                                                                                              |
| Dai et al, <sup>23</sup> 2016 (US)            | A priori | MQHD                                              | Positive: vegetables, potatoes, fruits, grains, fish and shellfish, poultry, red meat, eggs, dairy products, UFA to SFA ratio, fried foods, non-fried foods, alcohol                                                                                                                                                                                   |
| Drake et al, <sup>24</sup> 2013 (Sweden)      | A priori | DQI-SNR                                           | Positive: vegetables and fruits, fish and shellfish; negative: sucrose, SFA; neutral: PUFA, dietary fiber                                                                                                                                                                                                                                              |
| Ford et al, <sup>25</sup> 2011 (US)           | A priori | HEI                                               | Positive: vegetables, fruits, grains 6-11 servings/d = 10, variety; negative: meat, milk, total fat, SFA, cholesterol; neutral: sodium                                                                                                                                                                                                                 |
| Ford et al, <sup>26</sup> 2012 (US)           | A priori | HEI                                               | Positive: vegetables, fruits, grains 6-11 servings/d = 10, variety; negative: meat, milk, total fat, SFA, cholesterol; neutral: sodium                                                                                                                                                                                                                 |
| Ford et al, <sup>27</sup> 2014 (US)           | A priori | DST based on HEI 2005                             | Positive: vegetables, whole fruit and juice, total and whole grains, lean proteins (chicken or turkey; fish or seafood, not fried), dietary supplement use; negative: added fats, sugars, and sweets (including alcoholic beverages), processed meats (cold cuts, hot dogs, lunch/deli meats, bacon or sausage); neutral: dairy (milk, cheese, yogurt) |

|                                          |          |                                                      |                                                                                                                                                                                                                                                                                                                                                                                                           |
|------------------------------------------|----------|------------------------------------------------------|-----------------------------------------------------------------------------------------------------------------------------------------------------------------------------------------------------------------------------------------------------------------------------------------------------------------------------------------------------------------------------------------------------------|
| Fresán et al, <sup>28</sup> 2019 (Spain) | A priori | Modified 2015 Dietary Guidelines for Americans Index | Positive: dark green vegetables, red/orange vegetables, starchy vegetables, other vegetables, variety of vegetables and fruits, legumes, fruits, whole grains, cereals, fish and seafood, meat and eggs, low-fat dairy, lean meat products, dairy products, dietary fiber density; neutral: total fat, SFA, trans fatty acids, cholesterol, sodium; negative: added sugar, dietary fiber density, alcohol |
| George et al, <sup>29</sup> 2014 (US)    | A priori | AHEI 2010                                            | Positive: vegetables (not potatoes, french fries), fruits, legumes and nuts, whole grains, long-chain fats (EPA + DHA), PUFA; negative: red and processed meat, sugar-sweetened beverages and fruit juices, trans fatty acids, sodium; neutral: alcohol                                                                                                                                                   |
|                                          |          | aMED                                                 | Positive: vegetables (not potatoes), legumes, fruits, nuts, whole grains, fish, MUFA/SFA; negative: red and processed meat; neutral: alcohol                                                                                                                                                                                                                                                              |
|                                          |          | DASH score                                           | Positive: vegetables (not potatoes and legumes), nuts and legumes, fruit and fruit juice, whole grains, low-fat dairy; negative: red and processed meat, sweetened beverages, sodium                                                                                                                                                                                                                      |
|                                          |          | HEI 2010                                             | Positive: total vegetables, greens and beans, total fruit, whole fruit, whole grains, seafood and plant proteins, total protein foods, dairy, fatty acids; negative: refined grains, added sugars in “empty calories,” solid fats in empty calories, sodium                                                                                                                                               |
| Harmon et al, <sup>30</sup> 2015 (US)    | A priori | aMED                                                 | Positive: vegetables (not potatoes), legumes, fruits, nuts, whole grains, fish, MUFA/SFA; negative: red and processed meat; neutral: alcohol                                                                                                                                                                                                                                                              |
|                                          |          | AHEI 2010                                            | Positive: vegetables (not potatoes, french fries), fruits, legumes and nuts, whole grains, long-chain fats (EPA + DHA), PUFA; negative: red and processed meat, sugar-sweetened beverages and fruit juices, trans fatty acids, sodium; neutral: alcohol                                                                                                                                                   |
|                                          |          | DASH score                                           | Positive: vegetables (not potatoes and legumes), nuts and legumes, fruit and fruit juice, whole grains, low-fat dairy; negative: red and processed meat, sweetened beverages, sodium                                                                                                                                                                                                                      |
|                                          |          | HEI 2010                                             | Positive: total vegetables, greens and beans, total fruit, whole fruit, whole grains, seafood and plant proteins, total protein foods, dairy, fatty acids; negative: refined grains, added sugars in “empty calories,” solid fats in empty calories, sodium                                                                                                                                               |

|                                                                                                                     |          |                                                |                                                                                                                                                                                                                                                         |
|---------------------------------------------------------------------------------------------------------------------|----------|------------------------------------------------|---------------------------------------------------------------------------------------------------------------------------------------------------------------------------------------------------------------------------------------------------------|
| Hashemian et al, <sup>31</sup> 2019 (Iran)                                                                          | A priori | AHEI 2010                                      | Positive: vegetables (not potatoes, french fries), fruits, legumes and nuts, whole grains, long-chain fats (EPA + DHA), PUFA; negative: red and processed meat, sugar-sweetened beverages and fruit juices, trans fatty acids, sodium; neutral: alcohol |
|                                                                                                                     |          | aMED                                           | Positive: vegetables (not potatoes), legumes, fruits, nuts, whole grains, fish, MUFA/SFA; negative: red and processed meat; neutral: alcohol                                                                                                            |
|                                                                                                                     |          | DASH score                                     | Positive: vegetables (not potatoes and legumes), nuts and legumes, fruit and fruit juice, whole grains, low-fat dairy; negative: red and processed meat, sweetened beverages, sodium                                                                    |
|                                                                                                                     |          | HEI 2015                                       | Positive: total vegetables, greens and beans, total fruit, whole fruit, whole grains, seafood and plant proteins, total protein foods, dairy, PUFA+MUFA/SFA; negative: refined grains, added sugars, SFA, sodium                                        |
|                                                                                                                     |          | WCRF/AICR (diet only) score                    | Positive: vegetables and fruits, dietary fiber; negative: red and processed meat, sugary drinks, alcohol, sodium, energy-dense foods                                                                                                                    |
| Haveman-Nies et al, <sup>32</sup> 2002 (Belgium, Denmark, Italy, the Netherlands, Portugal, Spain, and Switzerland) | A priori | Adjusted MedDietScore                          | Positive: vegetables and fruits, legumes, nuts, seeds, grains, MUFA/SFA; negative: red and processed meat, dairy products; neutral: alcohol                                                                                                             |
| Hodge et al, <sup>33</sup> 2011 (Australia)                                                                         | A priori | MDS                                            | Positive: vegetables, legumes, fruits, nuts, cereals, fish, olive oil; negative: red and processed meat, dairy products; neutral: alcohol                                                                                                               |
| Hodge et al, <sup>34</sup> 2018 (Australia)                                                                         | A priori | MDS, using olive oil instead of MUFA/SFA ratio | Positive: vegetables, legumes, fruits, nuts, cereals, fish, olive oil; negative: red and processed meat, dairy products; neutral: alcohol                                                                                                               |
| Hu et al, <sup>35</sup> 2020 (US)                                                                                   | A priori | AHEI 2010                                      | Positive: vegetables (not potatoes, french fries), fruits, legumes and nuts, whole grains, long-chain fats (EPA + DHA), PUFA; negative: red and processed meat, sugar-sweetened beverages and fruit juices, trans fatty acids, sodium; neutral: alcohol |
|                                                                                                                     |          | aMED                                           | Positive: vegetables (not potatoes), legumes, fruits, nuts, whole grains, fish, MUFA/SFA; negative: red and processed meat; neutral: alcohol                                                                                                            |
|                                                                                                                     |          | DASH score                                     | Positive: vegetables (not potatoes and legumes), nuts and legumes, fruit and fruit juice, whole grains, low-fat dairy; negative: red and processed meat, sweetened beverages, sodium                                                                    |

|                                                     |          |                      |                                                                                                                                                                                                                                                                                                                                                                                                                                                                                        |
|-----------------------------------------------------|----------|----------------------|----------------------------------------------------------------------------------------------------------------------------------------------------------------------------------------------------------------------------------------------------------------------------------------------------------------------------------------------------------------------------------------------------------------------------------------------------------------------------------------|
|                                                     |          | HEI 2015             | Positive: total vegetables, greens and beans, total fruit, whole fruit, whole grains, seafood and plant proteins, total protein foods, dairy, PUFA+MUFA/SFA; negative: refined grains, added sugars, SFA, sodium                                                                                                                                                                                                                                                                       |
| Hulsege et al, <sup>36</sup> 2016 (the Netherlands) | A priori | mMDS                 | Positive: vegetables, legumes, fruits, cereals, fish, MUFA+PUFA/SFA; negative: meat, dairy products; neutral: alcohol                                                                                                                                                                                                                                                                                                                                                                  |
| Kaluzza et al, <sup>37</sup> 2009 (Sweden)          | A priori | NRFS                 | Negative: white bread, sweets (combined buns/cakes and biscuits/wafers/rusks and gateau/pastries), pork, beef and veal, minced meat, hamburgers, meatballs, sausage (as main dish), meat or sausage (on sandwiches), liver and kidney, blood pudding, liver pate, cheese (28% fat), butter (80% fat), cream or crème fraiche, potato chips, popcorn, fried potatoes or french fries, mayonnaise, ice cream                                                                             |
|                                                     |          | RFS                  | Positive: tomatoes, broccoli, spinach, mustard, turnip, collard greens, carrots or mixed vegetables and carrots, green salad, sweet potatoes, yams, other potatoes, dried beans, apples or pears, oranges, cantaloupe, orange or grapefruit juice, grapefruit, other fruit juices, dark breads (whole wheat, rye, pumpernickel), cornbread, tortillas and grits, high-fiber cereals, cooked cereals, fish (baked or broiled), chicken or turkey (baked or stewed), milk (skim, 1%, 2%) |
| Kaluzza et al, <sup>38</sup> 2019 (Australia)       | A priori | AIDI                 | Positive: vegetables and fruits, nuts, whole grain bread, breakfast cereal, low-fat cheese, olive and canola oil, red wine, tea, chocolate; negative: chips, processed meat, unprocessed meat, offal, soft drinks                                                                                                                                                                                                                                                                      |
| Kant et al, <sup>39</sup> 2000 (US)                 | A priori | RFS                  | Positive: tomatoes, broccoli, spinach, mustard, turnip, collard greens, carrots or mixed vegetables and carrots, green salad, sweet potatoes, yams, other potatoes, dried beans, apples or pears, oranges, cantaloupe, orange or grapefruit juice, grapefruit, other fruit juices, dark breads (whole wheat, rye, pumpernickel), cornbread, tortillas and grits, high-fiber cereals, cooked cereals, fish (baked or broiled), chicken or turkey (baked or stewed), milk (skim, 1%, 2%) |
| Kant et al, <sup>40</sup> 2004 (US)                 | A priori | RFBS, a modified RFS | Positive: tomatoes, broccoli, spinach, mustard, turnip, collard greens, carrots or mixed vegetables and carrots, green salad, sweet potatoes, baked or boiled potatoes, dried beans, all fruits (apples or apple sauce, oranges, grapefruits, cantaloupes), orange or grapefruit juice, other fruit                                                                                                                                                                                    |



|                                         |              |                                            |                                                                                                                                                                                                                                                                                                           |
|-----------------------------------------|--------------|--------------------------------------------|-----------------------------------------------------------------------------------------------------------------------------------------------------------------------------------------------------------------------------------------------------------------------------------------------------------|
|                                         |              |                                            | juices, whole grains (cooked cereals such as oatmeal), high-fiber cereals; dark breads (whole wheat, rye, pumpernickel), corn tortillas and breads, fish (baked or broiled), chicken or turkey, dry beans, nuts, low-fat or non-fat dairy (skim, 1%, 2%) milk, removal of chicken skin or fat on red meat |
|                                         | A posteriori | Fruit, vegetable, whole grain <sup>d</sup> | Emphasized fruit, vegetable, and whole grain                                                                                                                                                                                                                                                              |
|                                         |              | Ethnic <sup>d</sup>                        | Emphasized beans, corn bread/tortillas, and mustard greens loaded on this factor                                                                                                                                                                                                                          |
|                                         |              | Low-fat <sup>d</sup>                       | Emphasized skim milk and behavior-related items                                                                                                                                                                                                                                                           |
|                                         |              | Cluster 1 <sup>d</sup>                     | Less likely to mention whole grains and low-fat or skim milk, and to remove fat from meat and poultry                                                                                                                                                                                                     |
|                                         |              | Cluster 2 <sup>d</sup>                     | Less likely to mention most fruits and vegetables                                                                                                                                                                                                                                                         |
|                                         |              | Cluster 3 <sup>d</sup>                     | Less likely to mention most fruits and high-fiber cereals                                                                                                                                                                                                                                                 |
|                                         |              | Cluster 4 <sup>d</sup>                     | Highest proportion reporting weekly use of most items                                                                                                                                                                                                                                                     |
| Kant et al, <sup>41</sup> 2009 (US)     | A priori     | DBS                                        | Positive: vegetables, fruits, whole grains, lean meat, low-fat dairy; negative: added solid fat                                                                                                                                                                                                           |
| Kappeler et al, <sup>42</sup> 2013 (US) | A priori     | HEI                                        | Positive: vegetables, fruits, grains 6-11 servings/d = 10, variety; negative: meat, milk, total fat, SFA, cholesterol; neutral: sodium                                                                                                                                                                    |
| Kim et al, <sup>43</sup> 2013 (Korea)   | A priori     | Healthy diet score                         | Positive: vegetables and fruits, brown rice, fish; negative: sugar-sweetened beverages (coffee and soft drinks), sodium                                                                                                                                                                                   |
| Kim et al, <sup>44</sup> 2018 (US)      | A priori     | hPDI                                       | Positive: vegetables, legumes, fruits, whole grains, sugar-sweetened and artificially sweetened beverages, sweets and desserts, tea and coffee                                                                                                                                                            |
|                                         |              | uPDI                                       | Negative: potatoes, refined grains, fish or seafood, meat, fruit juices, egg, miscellaneous animal foods, dairy, animal fat                                                                                                                                                                               |
|                                         |              | PDI                                        | Positive: vegetables, potatoes, legumes, fruits, fruit juices, nuts, whole grains, refined grains, tea and coffee, sugar-sweetened and artificially sweetened beverages, sweets and desserts; negative: fish or seafood, meat, eggs, miscellaneous animal foods, dairy, animal fat                        |
| Kim et al, <sup>45</sup> 2019 (US)      | A priori     | hPDI                                       | Positive: vegetables, legumes, fruits, whole grains, sugar-sweetened and artificially sweetened beverages, sweets and desserts, tea and coffee                                                                                                                                                            |
|                                         |              | uPDI                                       | Negative: potatoes, refined grains, fish or seafood, meat, fruit juices, egg, miscellaneous animal foods, dairy, animal fat                                                                                                                                                                               |

|                                                                                                                                                 |          |                                                                   |                                                                                                                                                                                                                                                                                    |
|-------------------------------------------------------------------------------------------------------------------------------------------------|----------|-------------------------------------------------------------------|------------------------------------------------------------------------------------------------------------------------------------------------------------------------------------------------------------------------------------------------------------------------------------|
|                                                                                                                                                 |          | Provegetarian food pattern; Provegetarian Diet Index <sup>d</sup> | Positive: vegetables, potatoes, legumes, fruits, nuts, cereals, olive oil; negative: fish and other seafood, meats and meat products, eggs, dairy products, animal fats                                                                                                            |
|                                                                                                                                                 |          | PDI                                                               | Positive: vegetables, potatoes, legumes, fruits, fruit juices, nuts, whole grains, refined grains, tea and coffee, sugar-sweetened and artificially sweetened beverages, sweets and desserts; negative: fish or seafood, meat, eggs, miscellaneous animal foods, dairy, animal fat |
| Knoops et al, <sup>46</sup> 2004 (Belgium, Denmark, Finland, France, Greece, Hungary, Italy, the Netherlands, Portugal, Spain, and Switzerland) | A priori | mMDS                                                              | Positive: vegetables and potatoes, legumes, fruits, nuts and seeds, grains, fish, MUFA/SFA; negative: meat and meat products, dairy products                                                                                                                                       |
| Knoops et al, <sup>47</sup> 2006 (Belgium, Denmark, Finland, France, Greece, Italy, the Netherlands, Portugal, Spain, and Switzerland)          | A priori | mMDS                                                              | Positive: vegetables, legumes, nuts and seeds, fruits, cereals, fish, MUFA/SFA; negative: meat and poultry, dairy products; neutral: alcohol                                                                                                                                       |
|                                                                                                                                                 |          | MAI                                                               | Positive: vegetables, potatoes, legumes, fruits, cereals, MUFA, wine; negative: meat and poultry, eggs, milk and milk products, sugar, SFA                                                                                                                                         |
| Kurotani et al, <sup>48</sup> 2016 (Japan)                                                                                                      | A priori | Japanese Food Guide score                                         | Positive: vegetable dishes, fruits, grain dishes, fish and meat dishes, milk; negative: alcohol and snacks, total energy intake                                                                                                                                                    |
|                                                                                                                                                 |          | Modified Japanese Food Guide score                                | Positive: vegetable dishes, fruits, grain dishes, fish and meat dishes; white: red meat, milk; negative: alcohol and snacks, total energy intake                                                                                                                                   |
| Kurotani et al, <sup>49</sup> 2019 (Japan)                                                                                                      | A priori | Japanese Food Guide, according to Japanese ADI                    | Positive: vegetable dishes, fruits, grain dishes, fish and meat dishes, milk; negative: alcohol and snacks, total energy intake                                                                                                                                                    |
| Lagiou et al, <sup>50</sup> 2006 (Sweden)                                                                                                       | A priori | MDS                                                               | Positive: vegetables, legumes, fruits, nuts, cereals, fish, MUFA/SFA; negative: red and processed meat, dairy products; neutral: alcohol                                                                                                                                           |
| Lasheras et al, <sup>51</sup> 2000 (Spain)                                                                                                      | A priori | mMDS                                                              | Positive: vegetables, legumes, fruits, cereals (including breads, potatoes), MUFA/SFA; negative: meat and meat products, milk and dairy products; neutral: alcohol                                                                                                                 |

|                                                                                                                                |          |                       |                                                                                                                                                                                                                                                                                                                                                        |
|--------------------------------------------------------------------------------------------------------------------------------|----------|-----------------------|--------------------------------------------------------------------------------------------------------------------------------------------------------------------------------------------------------------------------------------------------------------------------------------------------------------------------------------------------------|
| Lassale et al, <sup>52</sup> 2016<br>(Denmark, France, Germany, Greece, Italy, the Netherlands, Norway, Spain, Sweden, and UK) | A priori | DASH score            | Positive: vegetables (not potatoes and legumes), nuts and legumes, fruit and fruit juice, whole grains, low-fat dairy; negative: red and processed meat, sweetened beverages, sodium                                                                                                                                                                   |
|                                                                                                                                |          | MDS                   | Positive: vegetables, legumes, fruits, nuts, cereals, fish, MUFA/SFA; negative: red and processed meat, dairy products; neutral: alcohol                                                                                                                                                                                                               |
|                                                                                                                                |          | rMED                  | Positive: vegetables (not potatoes), legumes, fruits, nuts, and Seeds (not juice), whole grains, refined flour, pasta, rice, bread, grains, fish, olive oil; negative: total and processed meat; neutral: alcohol                                                                                                                                      |
|                                                                                                                                |          | MSDPS                 | Positive: vegetables, potatoes and other starchy foods, legumes, olives, nuts, fruits, whole grains, fish and other seafood, poultry, eggs, meat, dairy, sweets, olive oil, wine                                                                                                                                                                       |
|                                                                                                                                |          | DQI-I                 | Positive: vegetables, fruits, cereals, PUFA/SFA, protein, calcium, iron, vitamin C; negative component: total fat, SFA, cholesterol, sodium, empty-energy foods; neutral: carbohydrate to protein to fat ratio                                                                                                                                         |
|                                                                                                                                |          | HEI 2010              | Positive: total vegetables, greens and beans, total fruit, whole fruit, whole grains, seafood and plant proteins, total protein foods, dairy, fatty acids; negative: refined grains, added sugars in “empty calories,” solid fats in empty calories, sodium                                                                                            |
|                                                                                                                                |          | HNFI                  | Positive: cabbage, root vegetables, apples and pears, rye bread, oatmeal, fish                                                                                                                                                                                                                                                                         |
|                                                                                                                                |          | HLI-Diet              | Positive: vegetables, fruits, fatty fish, PUFA/SFA; negative: margarine                                                                                                                                                                                                                                                                                |
| Lim et al, <sup>53</sup> 2018 (Korea)                                                                                          | A priori | DQI-K                 | Positive: vegetables, fruits, whole grain; negative: sweetened beverages, total fat, SFA, cholesterol, protein, sodium                                                                                                                                                                                                                                 |
| Limongi et al, <sup>54</sup> 2017 (Italy)                                                                                      | A priori | MDS                   | Positive: vegetables, legumes, fruits, whole grain products, fish and seafood (not breaded), poultry (not breaded), olive oil; negative: red and processed meat, eggs, sweets; neutral: milk and dairy products                                                                                                                                        |
| Liu et al, <sup>55</sup> 2019 (US)                                                                                             | A priori | DST based on HEI 2005 | Positive: vegetables, whole fruit and juice, total and whole grains, lean proteins (chicken or turkey; fish or seafood, not fried), dietary supplement use; negative: added fats, sugars, and sweets (including alcoholic beverages), processed meats (cold cuts, hot dogs, lunch/deli meats, bacon or sausage); neutral: dairy (milk, cheese, yogurt) |
| Loprinzi et al, <sup>56</sup> 2018 (US)                                                                                        | A priori | AHEI 2005             | Positive: total vegetables, dark green/orange vegetables, legumes, total fruit, whole fruit, whole grains, total grains, meat and beans, milk,                                                                                                                                                                                                         |

|                                                     |          |                            |                                                                                                                                                                                                                                                                                                                                                                                                                                                                                        |
|-----------------------------------------------------|----------|----------------------------|----------------------------------------------------------------------------------------------------------------------------------------------------------------------------------------------------------------------------------------------------------------------------------------------------------------------------------------------------------------------------------------------------------------------------------------------------------------------------------------|
|                                                     |          |                            | yogurt, cheese, soy beverages, healthy oils; negative: SFA, solid fats, alcohol, added sugars, sodium                                                                                                                                                                                                                                                                                                                                                                                  |
| Mai et al, <sup>57</sup> 2005 (US)                  | A priori | RFS                        | Positive: tomatoes, broccoli, spinach, mustard, turnip, collard greens, carrots or mixed vegetables and carrots, green salad, sweet potatoes, yams, other potatoes, dried beans, apples or pears, oranges, cantaloupe, orange or grapefruit juice, grapefruit, other fruit juices, dark breads (whole wheat, rye, pumpernickel), cornbread, tortillas and grits, high-fiber cereals, cooked cereals, fish (baked or broiled), chicken or turkey (baked or stewed), milk (skim, 1%, 2%) |
| Martínez-Gómez et al, <sup>58</sup> 2013 (Spain)    | A priori | Healthy diet score         | Positive: vegetables, fruits, whole grains, fish, vegetable fats; negative: red and processed meat, animal fats                                                                                                                                                                                                                                                                                                                                                                        |
| Martínez-González et al, <sup>59</sup> 2012 (Spain) | A priori | MDS                        | Positive: vegetables, legumes, fruits, nuts, cereals, fish, MUFA/SFA; negative: red and processed meat, dairy products; neutral: alcohol                                                                                                                                                                                                                                                                                                                                               |
| Martínez-González et al, <sup>60</sup> 2014 (Spain) | A priori | Provegetarian food pattern | Positive: vegetables, potatoes, legumes, fruits, nuts, cereal, olive oil; negative: fish and other seafood, meats and meat products, eggs, dairy products, animal fat                                                                                                                                                                                                                                                                                                                  |
| McCullough et al, <sup>61</sup> 2011 (US)           | A priori | Healthy diet score         | Positive: vegetables and fruits, fruit and vegetable variety, fruit, whole grains; negative: red and processed meat                                                                                                                                                                                                                                                                                                                                                                    |
| McNaughton et al, <sup>62</sup> 2012 (UK)           | A priori | MDS                        | Positive: vegetables, legumes, fruits, nuts, cereals, fish, MUFA/SFA; negative: red and processed meat, dairy products; neutral: alcohol                                                                                                                                                                                                                                                                                                                                               |
|                                                     |          | RFS                        | Positive: tomatoes, broccoli, spinach, mustard, turnip, collard greens, carrots or mixed vegetables and carrots, green salad, sweet potatoes, yams, other potatoes, dried beans, apples or pears, oranges, cantaloupe, orange or grapefruit juice, grapefruit, other fruit juices, dark breads (whole wheat, rye, pumpernickel), cornbread, tortillas and grits, high-fiber cereals, cooked cereals, fish (baked or broiled), chicken or turkey (baked or stewed), milk (skim, 1%, 2%) |
|                                                     |          | Healthy diet score         | Positive: vegetables and fruits, pulses and nuts, fish, dietary fiber, calcium; negative: red and meat products, total nonmilk extrinsic sugars, SFA, cholesterol; neutral: PUFA, carbohydrates, protein                                                                                                                                                                                                                                                                               |
| Menotti et al, <sup>63</sup> 2012 (Italy)           | A priori | MAI                        | Positive: vegetables, legumes, fruit (fresh and dry), cereals, fish, virgin olive oil, wine; negative: cakes, pies, cookies, sugar, meat and poultry, eggs, milk, cheese, sweet beverages, animal fats and margarines                                                                                                                                                                                                                                                                  |

|                                                                                                                               |          |                                                   |                                                                                                                                                                                                                                                                                                                                                                                                                                                                                        |
|-------------------------------------------------------------------------------------------------------------------------------|----------|---------------------------------------------------|----------------------------------------------------------------------------------------------------------------------------------------------------------------------------------------------------------------------------------------------------------------------------------------------------------------------------------------------------------------------------------------------------------------------------------------------------------------------------------------|
| Menotti et al, <sup>64</sup> 2017<br>(Croatia, Finland, Greece, Italy, Japan, the Netherlands, Serbia, and US)                | A priori | MAI; wine was modified to all alcoholic beverages | Positive: vegetables, potatoes, legumes, fruits, cereals, MUFA, alcohol; negative: meat and poultry, eggs, milk and milk products; sugar, SFA                                                                                                                                                                                                                                                                                                                                          |
| Michels and Wolk, <sup>65</sup> 2002<br>(Sweden)                                                                              | A priori | NRFS                                              | Negative: white bread, sweets (combined buns/cakes and biscuits/wafers/rusks and gateau/pastries), pork, beef and veal, minced meat, hamburgers, meatballs, sausage (as main dish), meat or sausage (on sandwiches), liver and kidney, blood pudding, liver pate, cheese (28% fat), butter (80% fat), cream or crème fraiche, potato chips, popcorn, fried potatoes or french fries, mayonnaise, ice cream                                                                             |
|                                                                                                                               |          | RFS                                               | Positive: tomatoes, broccoli, spinach, mustard, turnip, collard greens, carrots or mixed vegetables and carrots, green salad, sweet potatoes, yams, other potatoes, dried beans, apples or pears, oranges, cantaloupe, orange or grapefruit juice, grapefruit, other fruit juices, dark breads (whole wheat, rye, pumpernickel), cornbread, tortillas and grits, high-fiber cereals, cooked cereals, fish (baked or broiled), chicken or turkey (baked or stewed), milk (skim, 1%, 2%) |
| Mitrou et al, <sup>66</sup> 2007 (US)                                                                                         | A priori | MDS                                               | Positive: vegetables, legumes, fruits, nuts, cereals, fish, MUFA/SFA; negative: red and processed meat, dairy products; neutral: alcohol                                                                                                                                                                                                                                                                                                                                               |
|                                                                                                                               |          | tMED                                              | Positive: vegetables (not potatoes), legumes, fruits, nuts, whole grains, fish, MUFA/SFA; negative: red and processed meat, dairy products; neutral: alcohol                                                                                                                                                                                                                                                                                                                           |
| Mokhtari et al, <sup>67</sup> 2019 (Iran)                                                                                     | A priori | DASH score                                        | Positive: vegetables (not potatoes and legumes), nuts and legumes, fruit and fruit juice, whole grains, low-fat dairy; negative: red and processed meat, sweetened beverages, sodium                                                                                                                                                                                                                                                                                                   |
| Muller et al, <sup>68</sup> 2016<br>(Denmark, France, Germany, Greece, Italy, the Netherlands, Norway, Spain, Sweden, and UK) | A priori | WCRF/AICR score (diet only)                       | Positive: vegetables and fruits, dietary fiber; negative: red and processed meat, sugary drinks, alcohol, sodium, energy-dense foods                                                                                                                                                                                                                                                                                                                                                   |
| Mursu et al, <sup>69</sup> 2013 (US)                                                                                          |          | AHEI 2010                                         | Positive: vegetables (not potatoes, french fries), fruits, legumes and nuts, whole grains, long-chain fats (EPA + DHA), PUFA; negative: red and                                                                                                                                                                                                                                                                                                                                        |

|                                                   |          |                                        |                                                                                                                                                                                                                                                                                                                                                                                                                |
|---------------------------------------------------|----------|----------------------------------------|----------------------------------------------------------------------------------------------------------------------------------------------------------------------------------------------------------------------------------------------------------------------------------------------------------------------------------------------------------------------------------------------------------------|
|                                                   |          |                                        | processed meat, sugar-sweetened beverages and fruit juices, trans fatty acids, sodium; neutral: alcohol                                                                                                                                                                                                                                                                                                        |
|                                                   | A priori | Diet quality score                     | Positive: green vegetables, other vegetables, tomatoes, legumes, beans, soy products, fruits, nuts, seeds, whole grains, fish, poultry, low-fat dairy, oil, tea, coffee, beer, wine, liquor; negative: fried potatoes, red meat, liver, processed meat, butter, whole-fat dairy, soft drinks, sweets, salty snacks, fried foods; neutral: potatoes, fruit juices, chocolate, diet soft drinks, eggs, margarine |
| Nakamura et al, <sup>70</sup> 2009 (Japan)        | A priori | Reduced-salt Japanese diet score       | Positive: tsukemono (pickled vegetables), fish; negative: noodles, eggs, meat; neutral: occasional drinking                                                                                                                                                                                                                                                                                                    |
| Neelakantan et al, <sup>71</sup> 2018 (Singapore) | A priori | aMED                                   | Positive: vegetables (not potatoes), legumes, fruits, nuts, whole grains, fish, MUFA/SFA; negative: red and processed meat; neutral: alcohol                                                                                                                                                                                                                                                                   |
|                                                   |          | DASH score                             | Positive: vegetables (not potatoes and legumes), nuts and legumes, fruit and fruit juice, whole grains, low-fat dairy; negative: red and processed meat, sweetened beverages, sodium                                                                                                                                                                                                                           |
|                                                   |          | AHEI                                   | Positive: vegetables (not potatoes, french fries), fruits, legumes and nuts, whole grains, long-chain fats (EPA + DHA), PUFA; negative: red and processed meat, sugar-sweetened beverages and fruit juices, trans fatty acids, sodium; neutral: alcohol                                                                                                                                                        |
| Nilsson et al, <sup>72</sup> 2012 (Sweden)        | A priori | Traditional Sami diet score            | Positive: berries, fatty fish, red meat, total fat; negative: bread, fiber                                                                                                                                                                                                                                                                                                                                     |
| Oba et al, <sup>73</sup> 2009 (Japan)             | A priori | Japanese Food Guide Spinning Top score | Positive: vegetable dishes, fruit, grain dishes, fish and meat dishes, milk, alcohol, energy from snacks                                                                                                                                                                                                                                                                                                       |
| Okada et al, <sup>74</sup> 2018 (Japan)           | A priori | Japan food score                       | Positive: vegetables (spinach or garland chrysanthemum, carrots or pumpkin, tomatoes, cabbage or head lettuce and Chinese cabbage), Japanese pickles, fungi, seaweeds, beans and bean products (boiled beans and tofu), fruits, fish (fresh)                                                                                                                                                                   |
| Olsen et al, <sup>75</sup> 2011 (Denmark)         | A priori | HNFI                                   | Positive: cabbage, root vegetables, apples and pears, rye bread, oatmeal, fish                                                                                                                                                                                                                                                                                                                                 |

|                                                   |              |                                 |                                                                                                                                                                                                                                                             |
|---------------------------------------------------|--------------|---------------------------------|-------------------------------------------------------------------------------------------------------------------------------------------------------------------------------------------------------------------------------------------------------------|
| Osler et al, <sup>76</sup> 2001 (Denmark)         | A priori     | Healthy food index <sup>d</sup> | Positive: Not consuming butter, lard, or margarine daily; consuming raw or boiled vegetables at least once daily; consuming either coarse white or coarse rye bread at least once daily and/or fruit at least once daily                                    |
|                                                   | A posteriori | Prudent <sup>d</sup>            | Wholemeal bread (and inversely with other types), pasta, rice, oatmeal products, fruits, vegetables, and fish                                                                                                                                               |
|                                                   |              | Western <sup>d</sup>            | High intake of meats, sausages, potatoes, butter, and white bread                                                                                                                                                                                           |
| Panizza et al, <sup>77</sup> 2018 (US)            | A priori     | HEI 2015                        | Positive: total vegetables, greens and beans, total fruit, whole fruit, whole grains, seafood and plant proteins, total protein foods, dairy, PUFA+MUFA/SFA; negative: refined grains, added sugars, SFA, sodium                                            |
| Park, Steck, Fung, et al, <sup>78</sup> 2016 (US) | A priori     | MedDietScore                    | Positive: vegetables, potatoes, legumes, fruits, whole grains, fish, olive oil; negative: red and processed meat, poultry, full-fat dairy, alcohol                                                                                                          |
| Park, Fung, Steck, et al, <sup>79</sup> 2016 (US) | A priori     | HEI                             | Positive: vegetables, fruits, grains 6-11 servings/d = 10, variety; negative: meat, milk, total fat, SFA, cholesterol; neutral: sodium                                                                                                                      |
| Prinelli et al, <sup>80</sup> 2015 (Italy)        | A priori     | MedDietScore                    | Positive: vegetables, potatoes, legumes, fruits, whole grains, fish, olive oil; negative: red and processed meat, poultry, full-fat dairy, alcohol                                                                                                          |
|                                                   |              | MDS                             | Positive: vegetables, legumes, fruits, nuts, cereals, fish, MUFA/SFA; negative: red and processed meat, dairy products; neutral: alcohol                                                                                                                    |
| Reedy et al, <sup>81</sup> 2014 (US)              | A priori     | AHEI 2010                       | Positive: vegetables (not potatoes, french fries), fruits, legumes and nuts, whole grains, long-chain fats (EPA + DHA), PUFA; negative: red and processed meat, sugar-sweetened beverages and fruit juices, trans fatty acids, sodium; neutral: alcohol     |
|                                                   |              | aMED                            | Positive: vegetables (not potatoes), legumes, fruits, nuts, whole grains, fish, MUFA/SFA; negative: red and processed meat; neutral: alcohol                                                                                                                |
|                                                   |              | DASH score                      | Positive: vegetables (not potatoes and legumes), nuts and legumes, fruit and fruit juice, whole grains, low-fat dairy; negative: red and processed meat, sweetened beverages, sodium                                                                        |
|                                                   |              | HEI 2010                        | Positive: total vegetables, greens and beans, total fruit, whole fruit, whole grains, seafood and plant proteins, total protein foods, dairy, fatty acids; negative: refined grains, added sugars in “empty calories,” solid fats in empty calories, sodium |
| Roswall et al, <sup>82</sup> 2015 (Sweden)        | A priori     | HNFI                            | Positive: cabbage, root vegetables, apples and pears, rye bread, oatmeal, fish                                                                                                                                                                              |

|                                                     |          |                |                                                                                                                                                                                                                                                         |
|-----------------------------------------------------|----------|----------------|---------------------------------------------------------------------------------------------------------------------------------------------------------------------------------------------------------------------------------------------------------|
| Seymour et al, <sup>83</sup> 2003 (US)              | A priori | DQI            | Positive: vegetables and fruits, breads, cereals, legumes, calcium;<br>negative: total fat, SFA, cholesterol, protein, sodium                                                                                                                           |
| Shah et al, <sup>84</sup> 2018 (US)                 | A priori | MDS            | Positive: vegetables, legumes, fruits, nuts, cereals, fish, MUFA/SFA;<br>negative: red and processed meat, dairy products; neutral: alcohol                                                                                                             |
|                                                     |          | DASH score     | Positive: vegetables (not potatoes and legumes), nuts and legumes, fruit and fruit juice, whole grains, low-fat dairy; negative: red and processed meat, sweetened beverages, sodium                                                                    |
| Shahar et al, <sup>85</sup> 2009 (US)               | A priori | HEI            | Positive: vegetables, fruits, grains 6-11 servings/d = 10, variety;<br>negative: meat, milk, total fat, SFA, cholesterol; neutral: sodium                                                                                                               |
| Shivappa et al, <sup>86</sup> 2017 (UK)             |          | AHEI 2010      | Positive: vegetables (not potatoes, french fries), fruits, legumes and nuts, whole grains, long-chain fats (EPA + DHA), PUFA; negative: red and processed meat, sugar-sweetened beverages and fruit juices, trans fatty acids, sodium; neutral: alcohol |
| Shvetsov et al, <sup>87</sup> 2016 (US)             |          | aMED, Q5 vs Q1 | Positive: vegetables (not potatoes), legumes, fruits, nuts, whole grains, fish, MUFA/SFA; negative: red and processed meat; neutral: alcohol                                                                                                            |
| Sijtsma et al, <sup>88</sup> 2015 (the Netherlands) | A priori | DHNaFS         | Positive: vegetables, potatoes, legumes (protein-rich plant foods), fruit, whole grains, fish, lean meat, eggs, low-fat milk and yogurt, vegetable oils and soft margarines, noncaloric drinks (tea, coffee, water)                                     |
|                                                     |          | DUNaFS         | Positive: processed vegetables, refined grains, high-fat meat, processed meat, full-fat milk, cheese, fruit juice and sugar-sweetened beverages, butter and hard margarines, ready meals and soups, spreads and snacks                                  |
| Sjögren et al, <sup>89</sup> 2010 (Sweden)          | A priori | mMDS           | Positive: vegetables and legumes, fruits, cereals and potatoes, fish, PUFA/SFA, alcohol; negative: meat and meat products, milk and milk products                                                                                                       |
| Sotos-Prieto et al, <sup>90</sup> 2017 (US)         | A priori | aMED           | Positive: vegetables (not potatoes), legumes, fruits, nuts, whole grains, fish, MUFA/SFA; negative: red and processed meat; neutral: alcohol                                                                                                            |
|                                                     |          | DASH score     | Positive: vegetables (not potatoes and legumes), nuts and legumes, fruit and fruit juice, whole grains, low-fat dairy; negative: red and processed meat, sweetened beverages, sodium                                                                    |
|                                                     |          | AHEI           | Positive: vegetables (not potatoes, french fries), fruits, legumes and nuts, whole grains, long-chain fats (EPA + DHA), PUFA; negative: red and processed meat, sugar-sweetened beverages and fruit juices, trans fatty acids, sodium; neutral: alcohol |



|                                                                                    |              |                      |                                                                                                                                                                                                               |
|------------------------------------------------------------------------------------|--------------|----------------------|---------------------------------------------------------------------------------------------------------------------------------------------------------------------------------------------------------------|
| Stefler et al, <sup>91</sup> 2017 (Poland, Russian Federation, and Czech Republic) | A priori     | Revised MDS          | Positive: vegetables, legumes, fruits, nuts, cereals, fish, olive oil; negative: meat and meat products, dairy products; neutral: alcohol                                                                     |
|                                                                                    |              | mMDS                 | Positive: vegetables, legumes, fruits, cereals, fish, MUFA+PUFA/SFA; negative: meat, dairy products; neutral: alcohol                                                                                         |
| Struijk et al, <sup>92</sup> 2014 (the Netherlands)                                | A priori     | mMDS adherence       | Positive: vegetables, legumes and nuts, fruits, grains, fish and seafood, MUFA+PUFA to SFA ratio; negative: meat, dairy; neutral: alcohol                                                                     |
|                                                                                    |              | DHD-I                | Scored from 0 to 10: vegetables, fruit, fiber, fish, SFA, trans fatty acids, salt, alcohol                                                                                                                    |
|                                                                                    | A posteriori | Prudent <sup>d</sup> | High intake of fish and shellfish, raw vegetables, wine, and high-fiber cereals                                                                                                                               |
|                                                                                    |              | Western <sup>d</sup> | High intake of french fries, fast food, low-fiber products, alcoholic drinks (except wine), and sugar-sweetened drinks                                                                                        |
| Thorpe et al, <sup>93</sup> 2013 (US)                                              | A priori     | HEI                  | Positive: vegetables, fruits, grains 6-11 servings/d = 10, variety; negative: meat, milk, total fat, SFA, cholesterol; neutral: sodium                                                                        |
| Tognon et al, <sup>94</sup> 2011 (Sweden)                                          | A priori     | mMDS (refined MDS)   | Positive: vegetables and potatoes, legumes, nuts, seeds, fruit and fresh juices, whole grain cereals, fish and fish products, MUFA+PUFA/SFA, alcohol; negative: meat, meat products, eggs, dairy products     |
|                                                                                    |              | mMDS, aMED (HALE)    | Positive: vegetables and potatoes, legumes, nuts, seeds, fruit and fresh juices, cereals, fish and fish products, MUFA/SFA; negative: meat, meat products, eggs, dairy products                               |
| Tognon et al, <sup>95</sup> 2012 (Sweden)                                          | A priori     | mMDS, refined        | Positive: vegetables and potatoes, legumes, nuts, seeds, fruit and fresh juices, whole grain cereals, fish and fish products, MUFA+PUFA/SFA, alcohol; negative: meat, meat products, eggs, dairy products     |
| Tognon et al, <sup>96</sup> 2014 (Denmark)                                         | A priori     | mMDS                 | Positive: vegetables, fruits, cereals, fish and fish products, MUFA+PUFA/SFA, alcohol; negative: meat, meat products, eggs, dairy products                                                                    |
| Tong et al, <sup>97</sup> 2016 (UK)                                                | A priori     | Literature-based MDS | Positive: vegetables, legumes, fruits, nuts, cereals, fish, olive oil; negative: meat, dairy products; neutral: alcohol                                                                                       |
|                                                                                    |              | mMDS                 | Positive: vegetables (not potatoes), legumes, fruits, nuts, seeds (not juice), whole grains, refined flour, pasta, rice, bread, grains, fish, olive oil; negative: total and processed meat; neutral: alcohol |

|                                                                                                                          |          |                                |                                                                                                                                                                                                                                                                    |
|--------------------------------------------------------------------------------------------------------------------------|----------|--------------------------------|--------------------------------------------------------------------------------------------------------------------------------------------------------------------------------------------------------------------------------------------------------------------|
|                                                                                                                          |          | PyrMDS                         | Positive: vegetables, legumes, fruits, nuts 1-2/d or 0/d, cereals, fish, white meat, eggs, dairy, olive oil; negative: potatoes, red meat, processed meat, sweets, alcohol                                                                                         |
|                                                                                                                          |          | Tertiles of the MDS            | Positive: vegetables, legumes, fruits, cereals, fish, olive oil; negative: meat, dairy products; neutral: alcohol                                                                                                                                                  |
| Trichopoulou et al, <sup>98</sup> 2003 (Greece)                                                                          | A priori | MDS                            | Positive: vegetables, legumes, fruits, nuts, cereals, fish, MUFA/SFA; negative: red and processed meat, dairy products; neutral: alcohol                                                                                                                           |
| Trichopoulou et al, <sup>99</sup> 2005 (Denmark, France, Germany, Greece, Italy, the Netherlands, Spain, Sweden, and UK) | A priori | mMDS                           | Positive: vegetables (not potatoes), legumes, fruits, nuts, and Seeds (not juice), whole grains, refined flour, pasta, rice, bread, grains, fish, olive oil; negative: total and processed meat; neutral: alcohol                                                  |
| Trichopoulou et al, <sup>100</sup> 2009 (Greece)                                                                         | A priori | MDS                            | Positive: vegetables, legumes, fruits, nuts, cereals, fish, MUFA/SFA; negative: red and processed meat, dairy products; neutral: alcohol                                                                                                                           |
| van Dam et al, <sup>101</sup> 2008 (US)                                                                                  | A priori | AHEI 2010                      | Positive: total vegetables, greens and beans, total fruit, whole fruit, whole grains, seafood and plant proteins, total protein foods, dairy, fatty acids (0-10); negative: refined grains, added sugars in “empty calories,” solid fats in empty calories, sodium |
| van den Brandt, <sup>102</sup> 2011 (the Netherlands)                                                                    | A priori | aMED                           | Positive: vegetables (not potatoes), legumes, fruits, nuts, whole grains, fish, MUFA/SFA; negative: red and processed meat; neutral: alcohol                                                                                                                       |
| van Lee et al, <sup>103</sup> 2016 (the Netherlands)                                                                     | A priori | DHD-I                          | Positive: vegetables, fruits, fish, dietary fiber; negative: SFA, trans fatty acids, alcohol, sodium                                                                                                                                                               |
| Voortman et al, <sup>104</sup> 2017 (the Netherlands)                                                                    | A priori | Dutch Dietary Guidelines score | Positive: vegetables, legumes, fruits, nuts, whole grains, fish, dairy products, UFA and oils, tea; negative: replace refined with whole-grain products, red meat, processed meat, alcohol, sodium                                                                 |
| Vormund et al, <sup>105</sup> 2015 (Switzerland)                                                                         | A priori | mMDS <sup>d</sup>              | Positive: vegetables, salad, fruits, nuts, whole grains, fish, MUFA/SFA; negative: red and processed meat, dairy products; neutral: alcohol                                                                                                                        |
|                                                                                                                          |          | aMED, mMDS                     | Positive: vegetables, salad, fruits, nuts, whole grains, fish, MUFA/SFA, dairy products; negative: red and processed meat; neutral: alcohol                                                                                                                        |
|                                                                                                                          |          | mMDS                           | Positive: vegetables, salad, fruits, nuts, whole grains, fish, MUFA/SFA; negative: red and processed meat; neutral: alcohol                                                                                                                                        |

|                                                                             |              |                                      |                                                                                                                                                                                                                                                                    |
|-----------------------------------------------------------------------------|--------------|--------------------------------------|--------------------------------------------------------------------------------------------------------------------------------------------------------------------------------------------------------------------------------------------------------------------|
| Wahlqvist et al, <sup>106</sup> 2005 (Australia, Greece, Japan, and Sweden) | A priori     | MDS                                  | Positive: vegetables, legumes, fruits, nuts, cereals, fish, MUFA/SFA; negative: red and processed meat, dairy products; neutral: alcohol                                                                                                                           |
| Warensjö Lemming et al, <sup>107</sup> 2018 (Sweden)                        | A priori     | aMED                                 | Positive: vegetables and fruits, legumes and nuts, nonrefined, high-fiber grains, fish, fermented dairy products, olive oil, rapeseed oil; negative: red and processed meat; neutral: alcohol                                                                      |
|                                                                             |              | HNFI                                 | Positive: cabbage, root vegetables, apples and pears, rye bread, oatmeal, fish                                                                                                                                                                                     |
| Whalen et al, <sup>108</sup> 2017 (US)                                      | A priori     | MedDietScore                         | Positive: vegetables, fruits, nuts (1-5 by quintiles), fish, lean meat (poultry, lean beef); negative: red and processed meat, sodium; neutral: grains and starches, dairy foods, alcohol                                                                          |
|                                                                             |              | Paleolithic diet score               | Positive: vegetables, fruit and vegetable diversity; fruits, nuts, fish, lean meat, calcium (from nondairy foods); negative: grains and starches, baked goods, red and processed meat, dairy foods, alcohol, sodium                                                |
| Yu et al, <sup>109</sup> 2015 (US)                                          | A priori     | HEI 2010                             | Positive: total vegetables, greens and beans, total fruit, whole fruit, whole grains, seafood and plant proteins, total protein foods, dairy, fatty acids (0-10); negative: refined grains, added sugars in “empty calories,” solid fats in empty calories, sodium |
| Zaslavsky et al, <sup>110</sup> 2017 (US)                                   | A priori     | DASH score                           | Positive: vegetables (not potatoes and legumes), nuts and legumes, fruit and fruit juice, whole grains, low-fat dairy; negative: red and processed meat, sweetened beverages, sodium                                                                               |
|                                                                             |              | aMED, <sup>d</sup> MDS               | Positive: vegetables, legumes, fruits, nuts, cereals, fish, MUFA/SFA; negative: red and processed meat, dairy products; neutral: alcohol                                                                                                                           |
| Zaslavsky et al, <sup>111</sup> 2018 (Sweden)                               | A priori     | aMED                                 | Positive: vegetables (not potatoes), legumes, fruits, nuts, whole grains, fish, MUFA/SFA; negative: red and processed meat; neutral: alcohol                                                                                                                       |
| Anderson et al, <sup>112</sup> 2011 (US)                                    | A posteriori | Healthy foods <sup>d</sup>           | Higher intake of low-fat dairy products, fruit, whole grains, poultry, fish and vegetables; lower consumption of meat, fried foods, sweets, high-energy drinks, and added fat                                                                                      |
|                                                                             |              | High-fat dairy products <sup>d</sup> | Higher intake of foods such as ice cream, cheese, and 2% and whole milk and yogurt; lower intake of poultry, low-fat dairy products, rice, and pasta                                                                                                               |

|                                                                                                                            |              |                                             |                                                                                                                                                                                                        |
|----------------------------------------------------------------------------------------------------------------------------|--------------|---------------------------------------------|--------------------------------------------------------------------------------------------------------------------------------------------------------------------------------------------------------|
|                                                                                                                            |              | Meat, fried foods, and alcohol <sup>d</sup> | NR: higher intake of meat, fried poultry, beer, liquor, rice, pasta, and mixed dishes, snacks, nuts, high-energy-density drinks, mayonnaise and salad dressing                                         |
|                                                                                                                            |              | Breakfast cereal <sup>d</sup>               | NR: higher intake of cold breakfast cereal, fiber/bran and other cold breakfast cereal; lower intake of dark yellow vegetables, refined grains, and nuts                                               |
|                                                                                                                            |              | Refined grains <sup>d</sup>                 | NR: higher intake of processed meat; lower intake of liquor, whole grains, cold breakfast cereal, fiber/bran and other cold breakfast cereal                                                           |
|                                                                                                                            |              | Sweets and desserts <sup>d</sup>            | Higher intake of doughnuts, cake, cookies, pudding, chocolate, and candy; lower intake of fruit, fish, other seafood, and dark green vegetables                                                        |
| Atkins et al, <sup>113</sup> 2016 (UK)                                                                                     | A posteriori | High-fat/low-fiber <sup>d</sup>             | High in red meat, meat products, white bread, fried potato, and eggs                                                                                                                                   |
|                                                                                                                            |              | Prudent <sup>d</sup>                        | High in poultry, fish, fruits, vegetables, legumes, pasta, rice, wholemeal bread, eggs, and olive oil                                                                                                  |
|                                                                                                                            |              | High sugar <sup>d</sup>                     | High in biscuits, puddings, chocolates, sweets, sweet spreads, breakfast cereals                                                                                                                       |
| Bamia et al, <sup>114</sup> 2007 (Denmark, France, Germany, Greece, Italy, the Netherlands, Norway, Spain, Sweden, and UK) | A posteriori | Plant-based <sup>d</sup>                    | Higher plant foods such as vegetables and vegetable oils, fruits, pasta, rice, other grains and legumes; poor in potatoes, margarines, and nonalcoholic beverages                                      |
| Brunner et al, <sup>115</sup> 2008 (UK)                                                                                    | A posteriori | Unhealthy <sup>d</sup>                      | Higher-than-average consumption of meat and sausages, white bread, fries, and full-cream milk; average consumption of wine and beer; very low consumption of fruit and vegetables                      |
|                                                                                                                            |              | Sweets <sup>d</sup>                         | Higher-than-average consumption of biscuits, cakes, meat, sausages and savory pies, white bread, full-cream milk, butter, and wine and beer; average intake of fruit and vegetables                    |
|                                                                                                                            |              | Mediterranean-like <sup>d</sup>             | Higher-than-average consumption of wholemeal bread, fruits, vegetables, pasta and rice, and wine and beer; low intake of full-cream milk but high intake of butter; average consumption of white bread |

|                                               |              |                                                                         |                                                                                                                                                                                                                                                     |
|-----------------------------------------------|--------------|-------------------------------------------------------------------------|-----------------------------------------------------------------------------------------------------------------------------------------------------------------------------------------------------------------------------------------------------|
|                                               |              | Healthy <sup>d</sup>                                                    | Higher-than-average consumption of wholemeal bread, fruits and vegetables, and polyunsaturated margarine; average to low consumption of red meat, sweet foods, and wine and beer                                                                    |
| Granic et al, <sup>116</sup> 2013 (Sweden)    | A posteriori | Moderate intake and starch diet <sup>d</sup>                            | Medium intake of all foods: beef, pork, sausage, egg and egg dishes, fish and seafood, fruits and vegetables, potatoes, sweets, and milk; except for high intake of flour-based foods, pastries, and sandwiches                                     |
|                                               |              | Moderate intake with low flour-based food diet <sup>d</sup> [reference] | Moderate consumption of 8 food items: beef, pork, sausage, egg and egg dishes, fish and seafood, fruits and vegetables, potatoes, coffee cake and pastries, sweets, sandwich, and milk; minimal intake of flour-based dishes, low in refined starch |
|                                               |              | Meat and starch diet <sup>d</sup>                                       | Higher consumption of potatoes, milk, sandwiches, pork and sausage-based dishes                                                                                                                                                                     |
|                                               |              | Low meat intake diet <sup>d</sup>                                       | Lower intake of 8 food groups, including meat-based, egg-based, and potato-based dishes                                                                                                                                                             |
| Hamer et al, <sup>117</sup> 2010 (UK)         | A posteriori | Mediterranean <sup>d</sup>                                              | High consumption of fruits and raw vegetables, oily fish, coffee, and wine                                                                                                                                                                          |
|                                               |              | Health aware <sup>d</sup>                                               | High consumption of low-fat/high-fiber foods, such as boiled potatoes, green vegetables, and wholemeal bread                                                                                                                                        |
|                                               |              | Traditional <sup>d</sup>                                                | High consumption of white bread, eggs, bacon, and ham                                                                                                                                                                                               |
|                                               |              | Sweet and fat <sup>d</sup>                                              | High consumption of butter, whole milk, preserves, cream, buns, cakes, puddings, and pastries                                                                                                                                                       |
| Heidemann et al, <sup>118</sup> 2008 (US)     | A posteriori | Prudent <sup>d</sup>                                                    | High consumption of vegetables, fruit, legumes, fish, poultry, and whole grains                                                                                                                                                                     |
|                                               |              | Western <sup>d</sup>                                                    | High consumption of red meat, processed meat, refined grains, french fries, and sweets and desserts                                                                                                                                                 |
| Hoffmann et al, <sup>119</sup> 2005 (Germany) | A posteriori | PCA pattern 1                                                           | Higher in potatoes, vegetables, legumes, bread, all types of meat, eggs, sauces, and soups                                                                                                                                                          |
|                                               |              | PCA pattern 2                                                           | Higher in vegetables, fruits, dairy products, other cereals, vegetable oils, nonalcoholic beverages; lower in alcoholic beverages other than wine                                                                                                   |
|                                               |              | RRR pattern 1                                                           | Higher in meat, butter, sauces, and eggs; lower in bread and fruits                                                                                                                                                                                 |
|                                               |              | RRR pattern 2                                                           | Higher in legumes, poultry, fish, and margarine; lower in butter, sugar, and cakes                                                                                                                                                                  |

|                                                      |              |                                     |                                                                                                                                                                                                                                                    |
|------------------------------------------------------|--------------|-------------------------------------|----------------------------------------------------------------------------------------------------------------------------------------------------------------------------------------------------------------------------------------------------|
| Hsiao et al, <sup>120</sup> 2013 (US)                | A posteriori | Sweets and dairy <sup>d</sup>       | High consumption of baked goods, milk, sweetened coffee and tea, and dairy-based dessert food groups; lower intake of poultry                                                                                                                      |
|                                                      |              | Western <sup>d</sup>                | High consumption of bread, eggs, fats, fried vegetables, miscellaneous (sauces, condiments, etc.), alcohol, and soft drinks; lower intake of milk and whole fruit                                                                                  |
|                                                      |              | Health conscious <sup>d</sup>       | High consumption of pasta, noodles, rice, whole fruit, poultry, nuts, fish, and vegetables; lower intake of fried vegetables, processed meats, and soft drinks                                                                                     |
| Krieger et al, <sup>121</sup> 2018 (Switzerland)     | A posteriori | Sausage and vegetables <sup>d</sup> | High consumption of sausages and cooked vegetables and overall low dietary variety                                                                                                                                                                 |
|                                                      |              | Meat and salad <sup>d</sup>         | High consumption of meat and salad and overall low dietary variety                                                                                                                                                                                 |
|                                                      |              | Fish <sup>d</sup>                   | High consumption of fish and absence of meat-based products                                                                                                                                                                                        |
|                                                      |              | Traditional <sup>d</sup>            | High consumption of dairy products, eggs, chocolate, dark bread, and sausages with overall high dietary variety                                                                                                                                    |
|                                                      |              | High-fiber foods <sup>d</sup>       | High consumption of yogurt, salad, vegetables, fruits, and dark bread with overall high dietary variety                                                                                                                                            |
| Martínez-González et al, <sup>122</sup> 2015 (Spain) | A posteriori | Western <sup>d</sup>                | High consumption of high-fat processed meats and red meats, alcohol, refined grains, canned fish, whole-fat dairy products, sauces, eggs, processed meals, commercial bakery products, and chocolates; lower consumption of low-fat dairy products |
|                                                      |              | Mediterranean <sup>d</sup>          | High consumption of vegetables, EVOO, walnuts, oily fish and canned fish, fruits, other nuts, whole-wheat bread, white fish, and low-fat dairy products; low consumption of refined grains and other olive oils different from EVOO                |
| Masala et al, <sup>123</sup> 2007 (Italy)            | A posteriori | Prudent <sup>d</sup>                | High consumption of cooked vegetables, legumes, fish, and seed oil                                                                                                                                                                                 |
|                                                      |              | Pasta and meat <sup>d</sup>         | High consumption of pasta and other grains, tomato sauce, red and processed meats, added animal fat, white bread and wine; low consumption of yogurt                                                                                               |
|                                                      |              | Olive oil and salad <sup>d</sup>    | High consumption of olive oil, raw vegetables (tomatoes; leafy and root vegetables), soups, and white meat such as chicken and turkey                                                                                                              |
|                                                      |              | Sweets and dairy <sup>d</sup>       | High consumption of added sugar, cakes, ice cream, coffee, eggs, butter, milk, and cheese                                                                                                                                                          |
|                                                      | A posteriori | Factor 1 <sup>d</sup>               | High consumption of sugar, milk, meat, fruit, pastries, and cheese                                                                                                                                                                                 |

|                                                      |              |                                                 |                                                                                                                                                                                                       |
|------------------------------------------------------|--------------|-------------------------------------------------|-------------------------------------------------------------------------------------------------------------------------------------------------------------------------------------------------------|
| Menotti et al, <sup>124</sup> 2012 (Italy)           |              | Factor 2 <sup>d</sup>                           | High consumption of bread, cereals, vegetables, fish, potatoes, and oils                                                                                                                              |
|                                                      |              | Factor 3 <sup>d</sup>                           | High consumption of eggs and alcoholic beverages                                                                                                                                                      |
| Menotti et al, <sup>125</sup> 2014 (Italy)           | A posteriori | Factor 2 <sup>d</sup>                           | High consumption of bread, cereals, vegetables, fish, potatoes, and oils; diet score 3 [reference]                                                                                                    |
| Menotti et al, <sup>126</sup> 2016 (Italy)           | A posteriori | Factor 2, <sup>d</sup> Q5 vs Q1 [reference]     | High consumption of bread, cereals, vegetables, fish, potatoes, and oils; adherence divided into quintiles and arbitrarily named as follows:                                                          |
|                                                      |              | Non-Mediterranean diet <sup>d</sup> [reference] | Q1 of Factor 2                                                                                                                                                                                        |
|                                                      |              | Prudent diet <sup>d</sup>                       | Q2, Q3, and Q4 of Factor 2                                                                                                                                                                            |
|                                                      |              | Mediterranean diet <sup>d</sup>                 | Q5 of Factor 2                                                                                                                                                                                        |
| Nanri et al, <sup>127</sup> 2017 (Japan)             | A posteriori | Prudent <sup>d</sup>                            | High consumption of vegetables; fruit; soy products; potatoes; seaweed; mushrooms; and fish, including oily fish, seafood other than fish, and fish products                                          |
|                                                      |              | Westernized <sup>d</sup>                        | High consumption of meat, including pork and beef; processed meat; bread; dairy products; coffee; black tea; soft drinks; dressing; sauce; and mayonnaise                                             |
|                                                      |              | Traditional Japanese <sup>d</sup>               | High consumption of salmon, salty fish, oily fish, seafood other than fish, and pickles                                                                                                               |
| Odegaard et al, <sup>128</sup> 2014 (Singapore)      | A posteriori | Vegetable-, fruit-, and soy-rich <sup>d</sup>   | Predominantly consisting of vegetables, fruits, and soy-based items                                                                                                                                   |
|                                                      |              | Dim sum- and meat-rich <sup>d</sup>             | Prominent contributors were a variety of foods, predominantly dim sum, fresh and processed meats and seafood, noodle and rice dishes, sweetened foods, and deep-fried foods                           |
| Waijers et al, <sup>129</sup> 2006 (the Netherlands) | A posteriori | Mediterranean-like <sup>d</sup>                 | High consumption of pasta and rice, sauces, fish, and vegetables in combination with vegetable oils, wine, and other cereals; potatoes, bread, and margarine contributed negatively to this component |
|                                                      |              | Traditional Dutch dinner <sup>d</sup>           | High consumption of meat, potatoes, vegetables, eggs, and alcoholic beverages; low consumption of dairy products, sweets, and pastries                                                                |
|                                                      |              | Healthy traditional <sup>d</sup>                | High consumption of vegetables, fruits, dairy products, potatoes, legumes, and nonalcoholic beverages; low consumption of butter and alcoholic beverages                                              |

|                                                   |                        |                                            |                                                                                                                                                                                                                                                               |
|---------------------------------------------------|------------------------|--------------------------------------------|---------------------------------------------------------------------------------------------------------------------------------------------------------------------------------------------------------------------------------------------------------------|
| Zazpe et al, <sup>130</sup> 2014 (Spain)          | A posteriori           | Western <sup>d</sup>                       | High consumption of red meat, processed meats, potatoes, processed meals, fast food, full-fat dairy products, sauces, commercial bakery products, eggs, sugar-sweetened sodas, refined grains, and sugary products; low consumption of low-fat dairy products |
|                                                   |                        | Mediterranean <sup>d</sup>                 | High consumption of vegetables, fish and seafood, fruits, olive oil, low-fat dairy products, poultry, whole-wheat bread, nuts, juices, and legumes                                                                                                            |
|                                                   |                        | Alcoholic beverages <sup>d</sup>           | High consumption of alcohol: wine, beer, and other alcoholic beverages                                                                                                                                                                                        |
| Zhao et al, <sup>131</sup> 2019 (Japan)           | A posteriori           | Meat-fat pattern <sup>d</sup>              | High consumption of oils and fats, other cereals, meat, seasoning, potatoes, sugar, and noodles                                                                                                                                                               |
|                                                   |                        | Healthy pattern <sup>d</sup>               | High consumption of vegetables, fruits, mushrooms, algae, seafood, beans, and seasoning                                                                                                                                                                       |
|                                                   |                        | Dairy-bread pattern <sup>d</sup>           | High consumption of dairy products and bread; low intake of rice                                                                                                                                                                                              |
| Mihirshahi et al, <sup>132</sup> 2017 (Australia) | Other: animal products | Vegetarian <sup>d</sup>                    | Never eats any beef, lamb, pork, chicken, turkey, duck, processed meat, fish, or seafood                                                                                                                                                                      |
|                                                   |                        | Semivegetarian <sup>d</sup>                | Eats meat $\leq 1$ wk                                                                                                                                                                                                                                         |
|                                                   |                        | Pescovegetarian <sup>d</sup>               | Eats fish or seafood but not beef, lamb, pork, chicken, turkey, duck, or processed meat                                                                                                                                                                       |
|                                                   |                        | Nonvegetarian (some analyses) <sup>d</sup> | Combined semivegetarian, pescovegetarian, and regular meat eater                                                                                                                                                                                              |
| Song et al, <sup>133</sup> 2016 (US)              | Other: animal products | Regular meat eater <sup>d</sup>            | Consumes meat, including fish or seafood                                                                                                                                                                                                                      |
|                                                   |                        | Animal protein <sup>d</sup>                | Major sources included processed and unprocessed red meat, poultry, dairy products, fish, and egg                                                                                                                                                             |
| Key et al, <sup>134</sup> 2009 (UK)               | Other: animal products | Plant protein <sup>d</sup>                 | Major sources included bread, cereals, pasta, nuts, beans, and legumes                                                                                                                                                                                        |
|                                                   |                        | Meat eater <sup>d</sup>                    | Eats meat                                                                                                                                                                                                                                                     |
|                                                   |                        | Fish eater <sup>d</sup>                    | Does not eat meat but eats fish                                                                                                                                                                                                                               |
|                                                   |                        | Vegetarian <sup>d</sup>                    | Does not eat meat or fish but eats dairy products or eggs or both; also analyzed combined with vegan                                                                                                                                                          |
|                                                   |                        | Vegan <sup>d</sup>                         | Eats no animal products                                                                                                                                                                                                                                       |
|                                                   |                        | Nonvegetarian <sup>d</sup>                 | Meat eaters and fish eaters combined                                                                                                                                                                                                                          |
|                                                   |                        | Nonvegetarian <sup>d</sup>                 | Eats nonfish meats $\geq 1$ /mo; fish and all meats $\geq 1$ /wk                                                                                                                                                                                              |



|                                                   |                                                                               |                                                                                                                                                                                |                                                                                                                                                                                                                        |
|---------------------------------------------------|-------------------------------------------------------------------------------|--------------------------------------------------------------------------------------------------------------------------------------------------------------------------------|------------------------------------------------------------------------------------------------------------------------------------------------------------------------------------------------------------------------|
| Orlich et al, <sup>135</sup> 2013 (US and Canada) | Other: animal products                                                        | Semivegetarian <sup>d</sup>                                                                                                                                                    | Eats nonfish meats $\geq 1$ /mo; all meats combined 1/mo but $< 1$ /wk                                                                                                                                                 |
|                                                   |                                                                               | Pescovegetarian <sup>d</sup>                                                                                                                                                   | Eats fish $\geq 1$ /mo; all other meats $< 1$ /mo                                                                                                                                                                      |
|                                                   |                                                                               | Lacto-ovo vegetarian <sup>d</sup>                                                                                                                                              | Eats eggs and dairy $\geq 1$ /mo; fish and all other meats $< 1$ /mo                                                                                                                                                   |
|                                                   |                                                                               | Vegan <sup>d</sup>                                                                                                                                                             | Eats eggs and dairy, fish, and all other meats $< 1$ /mo                                                                                                                                                               |
| Chang-Claude et al, <sup>136</sup> 2005 (Germany) | Other: animal products                                                        | Vegetarian <sup>d</sup>                                                                                                                                                        | Vegetarian-combined vegan: avoids meat, fish, eggs, and dairy products; lacto-ovo vegetarian: avoids meat and fish but eats eggs and/or dairy products; nonvegetarian: occasionally or regularly eats meat and/or fish |
|                                                   |                                                                               | Lacto-ovo vegetarian <sup>d</sup>                                                                                                                                              |                                                                                                                                                                                                                        |
|                                                   |                                                                               | Nonvegetarian <sup>d</sup>                                                                                                                                                     |                                                                                                                                                                                                                        |
| Héroux et al, <sup>137</sup> 2010 (US)            | Other: RRR                                                                    | Response variables: unfavorable total and high-density lipoprotein cholesterol, triglyceride, glucose, blood pressure, uric acid, white blood cell, and body mass index values | Higher in processed and red meat, white potato products, non-whole grains, and added fat; lower in noncitrus fruit                                                                                                     |
| Meyer et al, <sup>138</sup> 2011 (Germany)        | Other: RRR, partial least squares regression, principal components regression | Response variables: IL-6, IL-18, and C-reactive protein                                                                                                                        | Lower intake of meat and beer; higher intake of fresh and cooked vegetables, fresh fruit, wholemeal bread, cereals and muesli, curd, nuts, sweet bread spread, and tea                                                 |
| Schnabel et al, <sup>139</sup> 2019 (France)      | Other                                                                         | Ultraprocessed <sup>d</sup>                                                                                                                                                    | 4th level of NOVA Food Classification System                                                                                                                                                                           |
| Kim et al, <sup>140</sup> 2019 (US)               | Other                                                                         | Ultraprocessed <sup>d</sup>                                                                                                                                                    | 4th level of NOVA Food Classification System by quartiles of intake in times/d:                                                                                                                                        |

|                                               |       |                             |                                                                                                                                                                 |
|-----------------------------------------------|-------|-----------------------------|-----------------------------------------------------------------------------------------------------------------------------------------------------------------|
|                                               |       |                             | <ul style="list-style-type: none"> <li>• Q1: 0 to &lt;2.6</li> <li>• Q2: 2.6 to &lt;3.8</li> <li>• Q3: 3.8 to &lt;5.2</li> <li>• Q4: 5.2 to &lt;29.8</li> </ul> |
| Rico-Campà et al, <sup>141</sup> 2019 (Spain) | Other | Ultraprocessed <sup>d</sup> | 4th level of NOVA Food Classification System in quarters: Q1: low; Q2: low-medium; Q3: medium-high; and Q4: high                                                |

Abbreviations: ADI, area deprivation index; AHEI, alternative healthy eating index; AICR, American Institute for Cancer Research; AIDI, anti-inflammatory diet index; aMED, alternate Mediterranean diet score; arMED, adapted relative Mediterranean diet score; DASH, Dietary Approaches to Stop Hypertension; DBS, dietary behavior score; DHA, docosahexaenoic acid; DHD, Dutch Healthy Diet; DHD-I, Dutch Healthy Diet index; DHNaFS, Dutch Healthy Nutrient and Food Score; DQI, Diet Quality Index; DQI-I, DQI-International; DQI-K, DQI for Koreans; DQI-SNR, DQI-Swedish Nutrition Recommendations; DST, dietary screening tool; DUNaFS, Dutch Undesirable Nutrient and Food Score; EPA, eicosapentaenoic acid; EVOO, extra virgin olive oil; HALE, Healthy Aging: a Longitudinal Study in Europe; HEI, Healthy Eating Index; HLI, healthy lifestyle index; HNFI, Healthy Nordic Food Index; hPDI, healthful plant-based diet index; IL, interleukin; MAI, Mediterranean Adequacy Index; MDS, Mediterranean diet score; MEDAS, Mediterranean Diet Adherence Screener; MedDietScore, Mediterranean-based diet score; MIND, Mediterranean-DASH Intervention for Neurodegenerative Delay; mMDS, modified MDS; MQHD, moderation-quantified healthy diet; MSDPS, Mediterranean-style dietary pattern score; MUFA, monounsaturated fatty acids; NR, not reported; NRFS, nonrecommended food score; PCA, principal component analysis; PDI, plant-based diet index; PUFA, polyunsaturated fatty acids; PyrMDS, Mediterranean Diet Pyramid Score; Q, quintile or quartile; RCT, randomized clinical trial; RFBS, recommended food and behavior score; RFS, recommended food score; rMED, relative Mediterranean diet score; RRR, reduced rank regression; SFA, saturated fatty acids; tMED, traditional Mediterranean diet score; UFA, unsaturated fatty acids; uPDI, unhealthful PDI; WCRF, World Cancer Research Fund.

<sup>a</sup>Adapted from the 2020 Dietary Guidelines Advisory Committee and Nutrition Evidence Systematic Review Team.<sup>142</sup>

<sup>b</sup>The original reference for the index/score is provided when available, after the name of the dietary pattern examined in the included article.

<sup>c</sup>Components from the dietary patterns examined by index or score analysis were scored as positive, negative, or neutral. Neutral items, such as alcoholic beverages, are typically scored as positive within a specified threshold (eg, 0.5-1.5 servings/d for women; 1.5-2.5 servings/d for men) or in moderate amounts (eg, 10-25 g/d) as reported by the included article.

<sup>d</sup>The name or label of the dietary pattern was assigned by the authors of the article.

eTable 2. Results by All Included Articles for Dietary Pattern and All-Cause Mortality (ACM) Analyses<sup>a,b</sup>

| Source                           | No. <sup>c</sup> | Intervention or exposure  | Subgroups | Results                                                                                                                                                                                                                       | Unaccounted for key confounders <sup>d</sup> |
|----------------------------------|------------------|---------------------------|-----------|-------------------------------------------------------------------------------------------------------------------------------------------------------------------------------------------------------------------------------|----------------------------------------------|
| Estruch et al, <sup>1</sup> 2018 | 7237             | Control                   | NA        | <ul style="list-style-type: none"> <li>Incident rate/1000 persons-years, 11.7 (95% CI, 9.6-14.0)</li> <li>Absolute 5 y ACM risk, 5.4% (95% CI, 4.4%-6.7%)</li> <li>ITT analyses, 1 [Reference]</li> </ul>                     | NA                                           |
|                                  |                  | Mediterranean diet + EVOO | NA        | <ul style="list-style-type: none"> <li>Incident ACM rate/1000 persons-years, 10.0 (95% CI, 8.2-11.9)</li> <li>Absolute 5 y ACM risk, 4.4% (95% CI, 3.6%- 5.4%)</li> <li>ITT analyses, HR: 0.90 (95% CI, 0.69-1.18)</li> </ul> | NA                                           |
|                                  |                  | Mediterranean diet + nuts | NA        | <ul style="list-style-type: none"> <li>Incident ACM rate/1000 persons-year, 11.2 (95% CI, 9.3-13.4)</li> <li>Absolute 5 y ACM risk, 5.4% (95% CI, 4.4%- 6.6%)</li> <li>ITT analyses, HR: 1.12 (95% CI, 0.86-1.47)</li> </ul>  | NA                                           |
| Abe et al, <sup>2</sup> 2020     | 14<br>764        | Japanese Diet Index       | NA        | <ul style="list-style-type: none"> <li>Q1, 1 [Reference]</li> <li>Q2, HR: 0.92 (95% CI, 0.85-1.00)</li> </ul>                                                                                                                 | NA                                           |

|                                   |           |                       |                     |                                                                                                                                                                                                                                                                                        |    |
|-----------------------------------|-----------|-----------------------|---------------------|----------------------------------------------------------------------------------------------------------------------------------------------------------------------------------------------------------------------------------------------------------------------------------------|----|
|                                   |           |                       |                     | <ul style="list-style-type: none"> <li>• Q3, HR: 0.91 (95% CI, 0.83-0.99)</li> <li>• Q4, HR: 0.91 (95% CI, 0.83-0.99);<br/><i>P</i> for trend = .03</li> </ul>                                                                                                                         |    |
| Akbaraly et al, <sup>3</sup> 2011 | 7319      | AHEI 2010             | NA                  | <ul style="list-style-type: none"> <li>• B (SE): -0.01 (0.00); <i>P</i> &lt; .001</li> </ul>                                                                                                                                                                                           | NA |
| Al Rifai et al, <sup>4</sup> 2018 | 1601      | MDS                   | NA                  | <ul style="list-style-type: none"> <li>• Q4 vs Q1-Q3, HR: 0.84 (95% CI, 0.64- 1.11)</li> <li>• Q4 vs Q1-Q3 (accelerated failure-time model): HR: 1.09 (95% CI, 0.95-1.26)</li> </ul>                                                                                                   | NA |
| Atkins et al, <sup>5</sup> 2014   | 3133      | Elderly Dietary Index | NA                  | <ul style="list-style-type: none"> <li>• Q1, 1 [Reference]</li> <li>• Q2, HR: 0.85 (95% CI, 0.70-1.03)</li> <li>• Q3, HR: 0.89 (95% CI, 0.72-1.10)</li> <li>• Q4, HR: 0.75 (95% CI, 0.60-0.94);<br/><i>P</i> for trend = .03</li> </ul>                                                | NA |
| Baden et al, <sup>6</sup> 2019    | 47<br>455 | hPDI                  | Female participants | <ul style="list-style-type: none"> <li>• Q1, HR: 1.09 (95% CI, 1.03-1.16)</li> <li>• Q2, HR: 1.00 (95% CI, 0.95-1.07)</li> <li>• Q3, 1 [Reference]</li> <li>• Q4, HR: 0.97 (95% CI, 0.91-1.03)</li> <li>• Q5, HR: 0.90 (95% CI, 0.85-0.96);<br/><i>P</i> for trend &lt;.001</li> </ul> | NA |
|                                   |           |                       | Male participants   | <ul style="list-style-type: none"> <li>• Q1, HR: 1.10 (95% CI, 1.02-1.19)</li> <li>• Q2, HR: 1.04 (95% CI, 0.96-1.12)</li> </ul>                                                                                                                                                       | NA |

|  |  |  |                              |                                                                                                                                                                                                                                                                                        |    |
|--|--|--|------------------------------|----------------------------------------------------------------------------------------------------------------------------------------------------------------------------------------------------------------------------------------------------------------------------------------|----|
|  |  |  |                              | <ul style="list-style-type: none"> <li>• Q3, 1 [Reference]</li> <li>• Q4, HR: 0.92 (95% CI, 0.85-1.00)</li> <li>• Q5, HR: 0.90 (95% CI, 0.82-0.98);<br/><i>P</i> for trend &lt;.001</li> </ul>                                                                                         |    |
|  |  |  | Female and male participants | <ul style="list-style-type: none"> <li>• Q1, HR: 1.10 (95% CI, 1.05-1.15)</li> <li>• Q3, 1 [Reference]</li> <li>• Q5, HR: 0.90 (95% CI, 0.85-0.95);<br/><i>P</i> for trend &lt;.001</li> </ul>                                                                                         | NA |
|  |  |  |                              | <ul style="list-style-type: none"> <li>• 8 y and 16 y change in hPDI, risk: 16% (95% CI, 13%-18%)</li> <li>• Q2, HR: 1.02 (95% CI, 0.97-1.07)</li> <li>• Q3, 1 [Reference]</li> <li>• Q4, HR: 0.95 (95% CI, 0.90-1.00)</li> </ul>                                                      |    |
|  |  |  | Female participants          | <ul style="list-style-type: none"> <li>• Q1, HR: 0.91 (95% CI, 0.85-0.98);<br/><i>P</i> for trend &lt;.001</li> <li>• Q2, HR: 0.97 (95% CI, 0.91-1.03)</li> <li>• Q3, 1 [Reference]</li> <li>• Q4, HR: 1.07 (95% CI, 1.01-1.14)</li> <li>• Q5, HR: 1.14 (95% CI, 1.08-1.21)</li> </ul> | NA |
|  |  |  | Male participants            | <ul style="list-style-type: none"> <li>• Q1, HR: 0.96 (95% CI, 0.88-1.05)</li> <li>• Q2, HR: 1.05 (95% CI, 0.97-1.13)</li> <li>• Q3, 1 [Reference]</li> </ul>                                                                                                                          | NA |

|  |  |     |                              |                                                                                                                                                                                                                                                                                 |    |
|--|--|-----|------------------------------|---------------------------------------------------------------------------------------------------------------------------------------------------------------------------------------------------------------------------------------------------------------------------------|----|
|  |  |     |                              | <ul style="list-style-type: none"> <li>• Q4, HR: 1.03 (95% CI, 0.95-1.12)</li> <li>• Q5, HR: 1.09 (95% CI, 1.00-1.17);<br/>P for trend = .03</li> </ul>                                                                                                                         |    |
|  |  |     | Female and male participants | <ul style="list-style-type: none"> <li>• Q1, HR: 0.93 (95% CI, 0.88-0.98);<br/>P for trend &lt;.001</li> <li>• Q2, HR: 1.00 (95% CI, 0.95-1.05)</li> <li>• Q3, 1 [Reference]</li> <li>• Q4, HR: 1.06 (95% CI, 1.01-1.11)</li> <li>• Q5, HR: 1.12 (95% CI, 1.07-1.18)</li> </ul> | NA |
|  |  | PDI | Female participants          | <ul style="list-style-type: none"> <li>• Q1, HR: 1.07 (95% CI, 1.01-1.14);<br/>P for trend &lt;.001</li> <li>• Q2, HR: 1.02 (95% CI, 0.96-1.09)</li> <li>• Q3, 1 [Reference]</li> <li>• Q4, HR: 0.96 (95% CI, 0.91-1.02)</li> <li>• Q5, HR: 0.95 (95% CI, 0.89-1.01)</li> </ul> | NA |
|  |  |     | Male participants            | <ul style="list-style-type: none"> <li>• Q1, HR: 1.13 (95% CI, 1.04-1.23);<br/>P for trend &lt;.001</li> <li>• Q2, HR: 1.03 (95% CI, 0.95-1.12)</li> <li>• Q3, 1 [Reference]</li> <li>• Q4, HR: 0.93 (95% CI, 0.85-1.01)</li> <li>• Q5, HR: 0.96 (95% CI, 0.88-1.04)</li> </ul> | NA |

|                                   |            |      |                              |                                                                                                                                                                                                                                                                                    |                |
|-----------------------------------|------------|------|------------------------------|------------------------------------------------------------------------------------------------------------------------------------------------------------------------------------------------------------------------------------------------------------------------------------|----------------|
|                                   |            |      | Female and male participants | <ul style="list-style-type: none"> <li>• Q1, HR: 1.09 (95% CI, 1.04-1.15): <i>P</i> for trend &lt;.001</li> <li>• Q2, HR: 1.03 (95% CI, 0.98-1.08)</li> <li>• Q3, 1 [Reference]</li> <li>• Q4, HR: 0.95 (95% CI, 0.91-1.00)</li> <li>• Q5, HR: 0.95 (95% CI, 0.90-1.00)</li> </ul> | NA             |
| Behrens et al, <sup>7</sup> 2013  | 170<br>672 | aMED | Female participants          | <ul style="list-style-type: none"> <li>• ≤Q3, 1 [Reference]</li> <li>• ≥Q4, RR: 0.87 (95% CI, 0.82-0.91); PAR, 9 (95% CI, 6-12)</li> </ul>                                                                                                                                         | NA             |
|                                   |            |      | Male participants            | <ul style="list-style-type: none"> <li>• ≤Q3, 1 [Reference]</li> <li>• ≥Q4, RR: 0.85 (95% CI, 0.82-0.88); PAR, 10 (8-12)</li> </ul>                                                                                                                                                |                |
|                                   |            |      | Female and male participants | <ul style="list-style-type: none"> <li>• ≤Q3, 1 [Reference]</li> <li>• ≥Q4, RR: 0.86 (95% CI, 0.83-0.88); PAR, 10 (8-11)</li> </ul>                                                                                                                                                | NA             |
| Bellavia et al, <sup>8</sup> 2016 | 71<br>333  | mMDS | NA                           | <ul style="list-style-type: none"> <li>• ACM:</li> <li>• Continuous, HR: 0.96 (95% CI, 0.95-0.97)</li> <li>• Lowest mMDS, 0-2: 1 [Reference]</li> <li>• Middle mMDS, 3-5, HR: 0.90 (95% CI, 0.86-0.95)</li> </ul>                                                                  | Race/ethnicity |

|                                    |        |             |                     |                                                                                                                                                                                                                                                          |                |
|------------------------------------|--------|-------------|---------------------|----------------------------------------------------------------------------------------------------------------------------------------------------------------------------------------------------------------------------------------------------------|----------------|
|                                    |        |             |                     | <ul style="list-style-type: none"> <li>• Highest mMDS, 6-8, HR: 0.81 (95% CI, 0.75-0.86)</li> <li>• Categorical extremes, 0 vs 8, HR: 0.71 (95% CI, 0.65-0.79)</li> </ul>                                                                                |                |
| Biesbroek et al, <sup>9</sup> 2017 | 35 031 | DASH score  | Female participants | <ul style="list-style-type: none"> <li>• Continuous, HR: 0.96 (95% CI, 0.92- 0.99)</li> <li>• T1, 1 [Reference]</li> <li>• T2, HR: 0.94 (95% CI, 0.85-1.03)</li> <li>• T3, HR: 0.94 (95% CI, 0.86-1.03)</li> </ul>                                       | Race/ethnicity |
|                                    |        |             | Male participants   | <ul style="list-style-type: none"> <li>• Continuous, male, HR: 0.92 (95% CI, 0.86-0.99)</li> <li>• T1, 1 [Reference]</li> <li>• T2, HR: 1.04 (95% CI, 0.89-1.22)</li> <li>• T3, HR: 0.87 (95% CI, 0.74-1.04);<br/><i>P</i> for trend = .15</li> </ul>    | NA             |
|                                    |        | DHD15-index | Female participants | <ul style="list-style-type: none"> <li>• Continuous, female, HR: 0.92 (95% CI, 0.88-0.96)</li> <li>• T1, 1 [Reference]</li> <li>• T2, HR: 0.86 (95% CI, 0.78-0.93)</li> <li>• T3, HR: 0.85 (95% CI, 0.78-0.94);<br/><i>P</i> for trend = .001</li> </ul> | NA             |
|                                    |        |             | Male participants   | <ul style="list-style-type: none"> <li>• Continuous, male, HR: 0.88 (95% CI, 0.82-0.95)</li> </ul>                                                                                                                                                       | NA             |



|                                   |       |            |    |                                                                                                                                                                                                                                                                                                                                                                                                                                                                                                      |                                   |
|-----------------------------------|-------|------------|----|------------------------------------------------------------------------------------------------------------------------------------------------------------------------------------------------------------------------------------------------------------------------------------------------------------------------------------------------------------------------------------------------------------------------------------------------------------------------------------------------------|-----------------------------------|
|                                   |       |            |    | <ul style="list-style-type: none"> <li>• T1, 1 [Reference]</li> <li>• T2, HR: 1.04 (95% CI, 0.88-1.21); <i>P</i> for trend = .04</li> <li>• T3, HR: 0.84 (95% CI, 0.69-0.98); <i>P</i> for trend = .04</li> </ul>                                                                                                                                                                                                                                                                                    |                                   |
| Bittoni et al, <sup>10</sup> 2015 | 8950  | HEI        | NA | <ul style="list-style-type: none"> <li>• HEI&lt;50 vs &gt;80; HR: 1.58 (95% CI, 1.45-1.77); <i>P</i> &lt; .001</li> </ul>                                                                                                                                                                                                                                                                                                                                                                            | Alcohol intake; physical activity |
| Bo et al, <sup>11</sup> 2016      | 1658  | MDS        | NA | <ul style="list-style-type: none"> <li>• Per-unit increase, at low CVD risk, HR: 0.83 (95% CI, 0.72-0.96); <i>P</i> = .01</li> <li>• Per-unit increase, at high CVD risk (<math>\geq 10</math>), HR: 1.02 (95% CI, 0.90-1.15); <i>P</i> = .81</li> <li>• Per-unit increase, all, HR: 0.94 (95% CI, 0.85-1.03); <i>P</i> = .20</li> <li>• Low, 1 [Reference]</li> <li>• Medium, HR: 0.80 (95% CI, 0.60-1.06); <i>P</i> = .12</li> <li>• High, HR: 0.85 (95% CI, 0.54-1.35); <i>P</i> = .50</li> </ul> | Race/ethnicity                    |
| Boggs et al, <sup>12</sup> 2015   | 37001 | DASH score | NA | <ul style="list-style-type: none"> <li>• Q1, 1 [Reference]</li> <li>• Q2, HR: 0.86 (95% CI, 0.75-1.0)</li> <li>• Q3, HR: 0.83 (95% CI, 0.71- 0.97)</li> <li>• Q4, HR: 0.75 (95% CI, 0.63-0.89)</li> </ul>                                                                                                                                                                                                                                                                                            | NA                                |

|                                    |      |                      |                     |                                                                                                                                                                                                                                                                                                  |                      |
|------------------------------------|------|----------------------|---------------------|--------------------------------------------------------------------------------------------------------------------------------------------------------------------------------------------------------------------------------------------------------------------------------------------------|----------------------|
|                                    |      |                      |                     | <ul style="list-style-type: none"> <li>Q5, HR: 0.75 (95% CI, 0.63-0.89); <i>P</i> for trend &lt;.001</li> </ul>                                                                                                                                                                                  |                      |
|                                    |      | Prudent <sup>e</sup> | NA                  | <ul style="list-style-type: none"> <li>Q1, 1 [Reference]</li> <li>Q2, HR: 1.05 (95% CI, 0.90-1.23)</li> <li>Q3, HR: 0.92 (95% CI, 0.78-1.08)</li> <li>Q4, HR: 0.99 (95% CI, 0.85-1.17)</li> <li>Q5 HR: 1.01 (95% CI, 0.86-1.2); <i>P</i> for trend = .98</li> </ul>                              | NA                   |
|                                    |      | Western <sup>e</sup> | NA                  | <ul style="list-style-type: none"> <li>Q1, 1 [Reference]</li> <li>Q2, HR: 1.10 (95% CI, 0.93-1.29)</li> <li>Q3, HR: 1.16 (95% CI, 0.99-1.37)</li> <li>Q4, HR: 1.18 (95% CI, 1.00-1.39)</li> <li>Q5, HR: 1.37 (95% CI, 1.17-1.6); <i>P</i> for trend &lt;.001</li> </ul>                          | NA                   |
| Bonaccio et al, <sup>13</sup> 2018 | 5200 | MDS                  | Female participants | <ul style="list-style-type: none"> <li>Poor (0-3), 1 [Reference]</li> <li>Average (4-6), HR: 0.88 (95% CI, 0.69-1.12)</li> <li>High (7-9), HR: 0.71 (95% CI, 0.42-1.17)</li> <li>1-unit increase, HR: 0.95 (95% CI, 0.88-1.02)</li> <li>2-unit increase, HR: 0.90 (95% CI, 0.77-1.04)</li> </ul> | Race/ethnicity<br>NR |

|                                   |      |                                                    |                              |                                                                                                                                                                                                                                                                                                                     |                                  |
|-----------------------------------|------|----------------------------------------------------|------------------------------|---------------------------------------------------------------------------------------------------------------------------------------------------------------------------------------------------------------------------------------------------------------------------------------------------------------------|----------------------------------|
|                                   |      |                                                    | Male participants            | <ul style="list-style-type: none"> <li>• 1-unit increase, HR: 0.94 (95% CI, 0.89-0.99)</li> <li>• 2-unit increase, HR: 0.88 (95% CI, 0.79-0.98)</li> <li>• Poor (0-3), 1 [Reference]</li> <li>• Average (4-6), HR: 0.83 (95% CI, 0.69-1.01)</li> <li>• High (7-9), HR: 0.75 (95% CI, 0.56-1.01)</li> </ul>          | NA                               |
|                                   |      |                                                    | Female and male participants | <ul style="list-style-type: none"> <li>• Poor (0-3), 1 [Reference]</li> <li>• Average (4-6), HR: 0.87 (95% CI, 0.75-1.01)</li> <li>• High (7-9), HR: 0.75 (95% CI, 0.58-0.97)</li> <li>• 1-unit increase, HR: 0.94 (95% CI, 0.90-0.98)</li> <li>• 2-unit increase, HR (95% CI): 0.89 (95% CI, 0.81-0.97)</li> </ul> | NA                               |
| Bongard et al, <sup>14</sup> 2016 | 960  | Programme National Nutrition Santé Guideline Score | NA                           | <ul style="list-style-type: none"> <li>• Per 1 unit increase, RR (95% CI): 0.96 (95% CI, 0.83-1.12) <i>P</i> = .63</li> </ul>                                                                                                                                                                                       | Race/ethnicity                   |
| Booth et al, <sup>15</sup> 2016   | 5709 | MDS                                                | NA                           | <ul style="list-style-type: none"> <li>• Q1, 1 [Reference]</li> <li>• Q2, HR: 0.95 (95% CI, 0.73-1.22)</li> <li>• Q3, HR: 0.7 (95% CI, 0.52-0.94)</li> </ul>                                                                                                                                                        | Physical activity; anthropometry |

|                                            |           |       |                     |                                                                                                                                                                                                                                                                          |                     |
|--------------------------------------------|-----------|-------|---------------------|--------------------------------------------------------------------------------------------------------------------------------------------------------------------------------------------------------------------------------------------------------------------------|---------------------|
|                                            |           |       |                     | <ul style="list-style-type: none"> <li>Q4, HR: 0.61 (95% CI, 0.46-0.82); <i>P</i> for trend &lt;.001</li> </ul>                                                                                                                                                          |                     |
| Brown et al, <sup>16</sup> 2016            | 1487      | HEI   | NA                  | <ul style="list-style-type: none"> <li>Poor, HEI: &lt;51, 1 [Reference]</li> <li>Fair, HEI: 51-80, HR: 0.74 (95% CI, 0.52-1.04)</li> <li>Good, HEI: &gt;80, HR: 0.70 (95% CI, 0.47-1.04); <i>P</i> for trend = .08</li> </ul>                                            | SES; alcohol intake |
| Buckland et al, <sup>17</sup> 2011         | 40<br>622 | arMED | NA                  | <ul style="list-style-type: none"> <li>Continuous, HR: 0.94 (95% CI, 0.90-0.97); <i>P</i> for trend &lt;.001</li> <li>Low, 1 [Reference]</li> <li>Medium, HR: 0.88 (95% CI, 0.79-0.99)</li> <li>High, HR: 0.79 (95% CI, 0.69-0.91); <i>P</i> for trend = .001</li> </ul> | Race/ethnicity      |
| Cárdenas-Fuentes et al, <sup>18</sup> 2019 | 7356      | MEDAS | NA                  | <ul style="list-style-type: none"> <li>T1, 1 [Reference]</li> <li>T2, HR: 0.56 (95% CI, 0.45-0.70)</li> <li>T3, HR: 0.47 (95% CI, 0.37-0.59); <i>P</i> for trend &lt;.001</li> </ul>                                                                                     | Race/ethnicity      |
| Chan et al, <sup>19</sup> 2019             | 2802      | DQI   | Female participants | <ul style="list-style-type: none"> <li>T1, 1 [Reference]</li> <li>T2, HR: 0.74 (95% CI, 0.58-0.96)</li> <li>T3, HR: 0.77 (95% CI, 0.5-1.0); <i>P</i> for trend = .04</li> </ul>                                                                                          | Race/ethnicity      |
|                                            |           |       | Male participants   | <ul style="list-style-type: none"> <li>T1, 1 [Reference]</li> </ul>                                                                                                                                                                                                      | NA                  |

|  |  |                                                                               |                     |                                                                                                                                                                                                             |    |
|--|--|-------------------------------------------------------------------------------|---------------------|-------------------------------------------------------------------------------------------------------------------------------------------------------------------------------------------------------------|----|
|  |  |                                                                               |                     | <ul style="list-style-type: none"> <li>• T2, HR: 0.93 (95% CI, 0.76-1.14)</li> <li>• T3, HR: 0.9 (95% CI, 0.73-1.10);<br/><i>P</i> for trend = .29</li> </ul>                                               |    |
|  |  | DASH score                                                                    | Female participants | <ul style="list-style-type: none"> <li>• High, 1 [Reference]</li> <li>• Low, HR: 1.18 (95% CI, 0.95-1.45)</li> </ul>                                                                                        | NA |
|  |  |                                                                               | Male participants   | <ul style="list-style-type: none"> <li>• High, 1 [Reference]</li> <li>• Low, HR: 1.11 (95% CI, 0.92-1.33)</li> </ul>                                                                                        | NA |
|  |  | MDS;<br>Trichopoulou, 2003                                                    | Female participants | <ul style="list-style-type: none"> <li>• 0-3, HR (95% CI): 1 [Reference]</li> <li>• 4-5, HR: 0.97 (95% CI, 0.77-1.22)</li> <li>• 6-9, HR: 0.89 (95% CI, 0.65-1.22);<br/><i>P</i> for trend = .48</li> </ul> | NA |
|  |  |                                                                               | Male participants   | <ul style="list-style-type: none"> <li>• 0-3, 1 [Reference]</li> <li>• 4-5, HR: 0.86 (95% CI, 0.71-1.03)</li> <li>• 6-9, HR: 0.96 (95% CI, 0.75-1.22);<br/><i>P</i> for trend = .48</li> </ul>              | NA |
|  |  | Mediterranean–<br>DASH Intervention<br>for<br>Neurodegenerative<br>Delay diet | Female participants | <ul style="list-style-type: none"> <li>• T1, 1 [Reference]</li> <li>• T2, HR: 0.88 (95% CI, 0.69-1.11)</li> <li>• T3, HR: 0.84 (95% CI, 0.63-1.12);<br/><i>P</i> for trend = .20</li> </ul>                 | NA |
|  |  |                                                                               | Male participants   | <ul style="list-style-type: none"> <li>• T1, 1 [Reference]</li> </ul>                                                                                                                                       | NA |

|  |  |                                          |                     |                                                                                                                                                                                        |    |
|--|--|------------------------------------------|---------------------|----------------------------------------------------------------------------------------------------------------------------------------------------------------------------------------|----|
|  |  |                                          |                     | <ul style="list-style-type: none"> <li>T2, HR: 0.95 (95% CI, 0.78-1.14)</li> <li>T3, HR: 0.85 (95% CI, 0.67-1.07);<br/><i>P</i> for trend = .17</li> </ul>                             |    |
|  |  | Okinawan diet score                      | Female participants | <ul style="list-style-type: none"> <li>T1, 1 [Reference]</li> <li>T2, HR: 0.72 (95% CI, 0.56-0.93)</li> <li>T3, HR: 0.78 (95% CI, 0.61-1.00);<br/><i>P</i> for trend = .046</li> </ul> | NA |
|  |  |                                          | Male participants   | <ul style="list-style-type: none"> <li>T1, 1 [Reference]</li> <li>T2, HR: 0.81 (95% CI, 0.65-1.01)</li> <li>T3, HR: 0.95 (95% CI, 0.78-1.16);<br/><i>P</i> for trend = .70</li> </ul>  | NA |
|  |  | Vegetable-fruits <sup>e</sup>            | Female participants | <ul style="list-style-type: none"> <li>T1, 1 [Reference]</li> <li>T2, HR: 1.04 (95% CI, 0.81-1.35)</li> <li>T3, HR: 1.04 (95% CI, 0.8-1.36);<br/><i>P</i> for trend = .74</li> </ul>   | NA |
|  |  |                                          | Male participants   | <ul style="list-style-type: none"> <li>T1, 1 [Reference]</li> <li>T2, HR: 0.82 (95% CI, 0.67-1.00)</li> <li>T3, HR: 0.86 (95% CI, 0.7-1.05);<br/><i>P</i> for trend = .12</li> </ul>   | NA |
|  |  | Snacks-drinks-milk products <sup>e</sup> | Female participants | <ul style="list-style-type: none"> <li>T1, 1 [Reference]</li> <li>T2, HR: 1.25 (95% CI, 0.97-1.6)</li> </ul>                                                                           | NA |

|                                 |           |                                     |                     |                                                                                                                                                                                                                                                                             |    |
|---------------------------------|-----------|-------------------------------------|---------------------|-----------------------------------------------------------------------------------------------------------------------------------------------------------------------------------------------------------------------------------------------------------------------------|----|
|                                 |           |                                     |                     | <ul style="list-style-type: none"> <li>T3, HR: 0.83 (95% CI, 0.62-1.11);<br/><i>P</i> for trend = .25</li> </ul>                                                                                                                                                            |    |
|                                 |           |                                     | Male participants   | <ul style="list-style-type: none"> <li>T1, 1 [Reference]</li> <li>T2, HR: 0.82 (95% CI, 0.67-1.00)</li> <li>T3, HR: 0.98 (95% CI, 0.79-1.20);<br/><i>P</i> for trend = .79</li> </ul>                                                                                       | NA |
|                                 |           | Meat-fish <sup>c</sup>              | Female participants | <ul style="list-style-type: none"> <li>T1, 1 [Reference]</li> <li>T2, HR: 0.94 (95% CI, 0.73-1.22)</li> <li>T3, HR: 1.00 (95% CI, 0.77-1.3); <i>P</i> for trend = .99</li> </ul>                                                                                            | NA |
|                                 |           |                                     | Male participants   | <ul style="list-style-type: none"> <li>T1, 1 [Reference]</li> <li>T2, HR: 0.93 (95% CI, 0.76-1.14)</li> <li>T3, HR: 0.87 (95% CI, 0.7-1.07);<br/><i>P</i> for trend = .17</li> </ul>                                                                                        | NA |
| Cheng et al, <sup>20</sup> 2018 | 35<br>221 | mMDS                                | NA                  | <ul style="list-style-type: none"> <li>Q1, 1 [Reference]</li> <li>Q2, HR: 0.95 (95% CI, 0.91-0.99)</li> <li>Q3, HR: 0.93 (95% CI, 0.89-0.98)</li> <li>Q4, HR: 0.91 (95% CI, 0.87-0.96)</li> <li>Q5, HR: 0.85 (95% CI, 0.82-0.90);<br/><i>P</i> for trend &lt;.01</li> </ul> | NA |
|                                 |           | Evolutionary-concordance diet score | NA                  | <ul style="list-style-type: none"> <li>Q1, 1 [Reference]</li> <li>Q2, HR: 0.98 (95% CI, 0.94-1.03)</li> </ul>                                                                                                                                                               | NA |

|                                         |           |                  |    |                                                                                                                                                                                                                                         |                                           |
|-----------------------------------------|-----------|------------------|----|-----------------------------------------------------------------------------------------------------------------------------------------------------------------------------------------------------------------------------------------|-------------------------------------------|
|                                         |           |                  |    | <ul style="list-style-type: none"> <li>• Q3, HR: 0.97 (95% CI, 0.92-1.01)</li> <li>• Q4, HR: 0.96 (95% CI, 0.91-1.01)</li> <li>• Q5, HR: 0.95 (95% CI, 0.91-1.00);<br/><i>P</i> for trend = .04</li> </ul>                              |                                           |
| Chrysohoou et al, <sup>21</sup> 2016    | 673       | MedDietScore     | NA | <ul style="list-style-type: none"> <li>• Energy intake/100 kcal (data NR),<br/>HR: 0.92 (95% CI, 0.86-1.00)</li> <li>• MedDietScore adherence, <i>P</i> &gt; .30</li> </ul>                                                             | Race/ethnicity;<br>SES; alcohol<br>intake |
| Cuenca-García et al, <sup>22</sup> 2014 | 12<br>449 | MDS              | NA | <ul style="list-style-type: none"> <li>• Q1, 1 [Reference]</li> <li>• Q2, HR: 1.17 (95% CI, 0.83-1.66)</li> <li>• Q3, HR: 1.21 (95% CI, 0.89-1.64)</li> <li>• Q4, HR: 1.15 (95% CI, 0.81-1.65);<br/><i>P</i> for trend = .68</li> </ul> | SES;<br>anthropometry                     |
|                                         |           | Ideal Diet Index | NA | <ul style="list-style-type: none"> <li>• Q1, 1 [Reference]</li> <li>• Q2, HR: 1.09 (95% CI, 0.82-1.45)</li> <li>• Q3, HR: 1.04 (95% CI, 0.77-1.41)</li> <li>• Q4, HR: 0.96 (95% CI, 0.68-1.34);<br/><i>P</i> for trend = .85</li> </ul> | NA                                        |
|                                         |           | DQI              | NA | <ul style="list-style-type: none"> <li>• Q1, 1 [Reference]</li> <li>• Q2, HR: 1.21 (95% CI, 0.88-0.65)</li> <li>• Q3, HR: 1.03 (95% CI, 0.75-1.42)</li> <li>• Q4, HR: 1.24 (95% CI, 0.90-1.74);<br/><i>P</i> for trend = .39</li> </ul> | NA                                        |



|                                 |           |                                    |                     |                                                                                                                                                                                                                                                                                                                                     |                     |
|---------------------------------|-----------|------------------------------------|---------------------|-------------------------------------------------------------------------------------------------------------------------------------------------------------------------------------------------------------------------------------------------------------------------------------------------------------------------------------|---------------------|
| Dai et al, <sup>23</sup> 2016   | 910       | Moderation-quantified healthy diet | NA                  | <ul style="list-style-type: none"> <li>• Overall Association, HR: 0.95 (95% CI, 0.91-1.00); <math>P = .03</math></li> <li>• Within Pair Association, HR (95% CI): 0.96 (95% CI, 0.90 to 1.03), <math>P = .24</math></li> <li>• Between Pair Association, HR (95% CI): 0.95 (95% CI, 0.89 to 1.003), <math>P = .07</math></li> </ul> | Physical activity   |
| Drake et al, <sup>24</sup> 2013 | 17<br>126 | DQI-SNR                            | Female participants | <ul style="list-style-type: none"> <li>• Predefined cutoffs:</li> <li>• Low, 1 [Reference]</li> <li>• Medium, HR: 1.03 (95% CI, 0.87-1.21)</li> <li>• High, HR: 0.93 (95% CI, 0.77-1.12); <math>P</math> for trend = .36</li> </ul>                                                                                                 | Race/ethnicity; SES |
|                                 |           |                                    |                     | <ul style="list-style-type: none"> <li>• Median-based cutoffs:</li> <li>• Low, 1 [Reference]</li> <li>• Medium, HR: 0.99 (95% CI, 0.84-1.17)</li> <li>• High, HR: 0.92 (95% CI, 0.74-1.13); <math>P</math> for trend = .32</li> </ul>                                                                                               |                     |
|                                 |           |                                    |                     | <ul style="list-style-type: none"> <li>• Quintile-based cutoffs:</li> <li>• Low, 1 [Reference]</li> <li>• Medium, HR: 0.86 (95% CI, 0.74-0.99)</li> </ul>                                                                                                                                                                           |                     |

|                                |           |     |                   |                                                                                                                                                                                                                           |               |
|--------------------------------|-----------|-----|-------------------|---------------------------------------------------------------------------------------------------------------------------------------------------------------------------------------------------------------------------|---------------|
|                                |           |     |                   | <ul style="list-style-type: none"> <li>High, HR: 0.86 (95% CI, 0.73-1.01); <i>P</i> for trend = .18</li> </ul>                                                                                                            |               |
|                                |           |     | Male participants | <ul style="list-style-type: none"> <li>Predefined cutoffs:</li> <li>Low, 1 [Reference]</li> <li>Medium, HR: 0.90 (95% CI, 0.78-1.03)</li> <li>High, HR: 0.79 (95% CI, 0.66-0.95); <i>P</i> for trend = .001</li> </ul>    | NA            |
|                                |           |     |                   | <ul style="list-style-type: none"> <li>Median-based cutoffs,</li> <li>Low, 1 [Reference]</li> <li>Medium, HR: 0.90 (95% CI, 0.78-1.04)</li> <li>High, HR: 0.92 (95% CI, 0.77-1.11); <i>P</i> for trend = .07</li> </ul>   |               |
|                                |           |     |                   | <ul style="list-style-type: none"> <li>Quintile-based cutoffs:</li> <li>Low, 1 [Reference]</li> <li>Medium, HR: 0.91 (95% CI, 0.80-1.04)</li> <li>High, HR: 0.84 (95% CI, 0.73-0.97); <i>P</i> for trend = .02</li> </ul> |               |
| Ford et al, <sup>25</sup> 2011 | 16<br>958 | HEI | NA                | <ul style="list-style-type: none"> <li>Healthy diet vs unhealthy diet HEI, HR: 0.85 (95% CI, 0.75-0.96); <i>P</i> &lt; .05</li> </ul>                                                                                     | Anthropometry |

|                                  |           |                                                      |    |                                                                                                                                                                                                                                                                                                                                    |                                     |
|----------------------------------|-----------|------------------------------------------------------|----|------------------------------------------------------------------------------------------------------------------------------------------------------------------------------------------------------------------------------------------------------------------------------------------------------------------------------------|-------------------------------------|
| Ford et al, <sup>26</sup> 2012   | 8375      | HEI                                                  | NA | <ul style="list-style-type: none"> <li>• Healthy diet vs unhealthy diet HEI, HR: 0.74 (95% CI, 0.58-0.96)</li> </ul>                                                                                                                                                                                                               | Anthropometry                       |
| Ford et al, <sup>27</sup> 2014   | 2995      | DST                                                  | NA | <ul style="list-style-type: none"> <li>• Healthy, DST score: &gt;75, 1 [Reference]</li> <li>• Unhealthy, DST score: &lt;60, HR: 1.34 (95% CI, 0.91-1.97); <i>P</i> = .14</li> <li>• Borderline, DST score: 60-75, HR: 1.13 (95% CI, 0.76-1.68); <i>P</i> = .39</li> </ul>                                                          | Race/ethnicity; SES; alcohol intake |
| Fresán et al, <sup>28</sup> 2019 | 16<br>866 | Modified 2015 Dietary Guidelines for Americans Index | NA | <ul style="list-style-type: none"> <li>• Q1, 1 [Reference]</li> <li>• Q2, HR: 0.92 (95% CI, 0.61-1.39)</li> <li>• Q3, HR: 0.89 (95% CI, 0.58-1.38)</li> <li>• Q4, HR: 0.42 (95% CI, 0.25-0.70); <i>P</i> for trend &lt;.001</li> </ul>                                                                                             | NA                                  |
| George et al, <sup>29</sup> 2014 | 63<br>805 | AHEI-2010                                            | NA | <ul style="list-style-type: none"> <li>• Q1, 1 [Reference]</li> <li>• Q2, HR (95% CI): 0.93 (95% CI, 0.86 to 1.01)</li> <li>• Q3, HR (95% CI): 0.90 (95% CI, 0.83 to 0.98)</li> <li>• Q4, HR (95% CI): 0.79 (95% CI, 0.72 to 0.86)</li> <li>• Q5, HR (95% CI): 0.82 (95% CI, 0.76 to 0.90); <i>P</i> for trend &lt;.001</li> </ul> | NA                                  |
|                                  |           | aMED                                                 | NA | <ul style="list-style-type: none"> <li>• Q1, 1 [Reference]</li> </ul>                                                                                                                                                                                                                                                              | NA                                  |

|                                  |            |            |                        |                                                                                                                                                                                                                                                                                        |                               |
|----------------------------------|------------|------------|------------------------|----------------------------------------------------------------------------------------------------------------------------------------------------------------------------------------------------------------------------------------------------------------------------------------|-------------------------------|
|                                  |            |            |                        | <ul style="list-style-type: none"> <li>• Q2, HR: 0.87 (95% CI, 0.80-0.94)</li> <li>• Q3, HR: 0.84 (95% CI, 0.77-0.91)</li> <li>• Q4, HR: 0.80 (95% CI, 0.73-0.87)</li> <li>• Q5, HR: 0.74 (95% CI, 0.68-0.81);<br/><i>P</i> for trend &lt;.001</li> </ul>                              |                               |
|                                  |            | DASH score | NA                     | <ul style="list-style-type: none"> <li>• Q1, 1 [Reference]</li> <li>• Q2, HR: 0.91 (95% CI, 0.83-0.99)</li> <li>• Q3, HR: 0.86 (95% CI, 0.80-0.93)</li> <li>• Q4, HR: 0.86 (95% CI, 0.79-0.94)</li> <li>• Q5, HR: 0.76 (95% CI, 0.70-0.83);<br/><i>P</i> for trend &lt;.001</li> </ul> | NA                            |
|                                  |            | HEI 2010   | NA                     | <ul style="list-style-type: none"> <li>• Q1, 1 [Reference]</li> <li>• Q2, HR: 0.93 (95% CI, 0.86-1.01)</li> <li>• Q3, HR: 0.82 (95% CI, 0.75-0.89)</li> <li>• Q4, HR: 0.84 (95% CI, 0.77-0.92)</li> <li>• Q5, HR: 0.76 (95% CI, 0.70-0.83);<br/><i>P</i> for trend &lt;.001</li> </ul> | NA                            |
| Harmon et al, <sup>30</sup> 2015 | 156<br>804 | aMED       | Female<br>participants | <ul style="list-style-type: none"> <li>• Q1, 1 [Reference]</li> <li>• Q2, HR: 0.90 (95% CI, 0.86-0.94)</li> <li>• Q3, HR: 0.83 (95% CI, 0.79-0.87)</li> <li>• Q4, HR: 0.84 (95% CI, 0.79-0.88)</li> </ul>                                                                              | Alcohol intake<br>(AHEI 2010) |

|  |  |            |                     |                                                                                                                                                                                                                                                                                  |    |
|--|--|------------|---------------------|----------------------------------------------------------------------------------------------------------------------------------------------------------------------------------------------------------------------------------------------------------------------------------|----|
|  |  |            |                     | <ul style="list-style-type: none"> <li>• Q5, HR: 0.78 (95% CI, 0.74-0.82);<br/>P for trend &lt;.001</li> </ul>                                                                                                                                                                   |    |
|  |  |            | Male participants   | <ul style="list-style-type: none"> <li>• Q1, 1 [Reference]</li> <li>• Q2, HR: 0.92 (95% CI, 0.88-0.97)</li> <li>• Q3, HR: 0.86 (95% CI, 0.82-0.90)</li> <li>• Q4, HR: 0.83 (95% CI, 0.79-0.87)</li> <li>• Q5, HR: 0.76 (95% CI, 0.73-0.80);<br/>P for trend &lt;.001</li> </ul>  | NA |
|  |  | AHEI 2010  | Female participants | <ul style="list-style-type: none"> <li>• Q1, 1 [Reference]</li> <li>• Q2, HR: 0.94 (95% CI, 0.90-0.99)</li> <li>• Q3, HR: 0.88 (95% CI, 0.84-0.93)</li> <li>• Q4, HR: 0.85 (95% CI, 0.81-0.90)</li> <li>• Q5, HR: 0.78 (95% CI, 0.74-0.82);<br/>P for trend &lt;.001</li> </ul>  | NA |
|  |  |            | Male participants   | <ul style="list-style-type: none"> <li>• Q1, 1 [Reference]</li> <li>• Q2, HR: 0.92 (95% CI, 0.88- 0.96)</li> <li>• Q3, HR: 0.90 (95% CI, 0.86-0.94)</li> <li>• Q4, HR: 0.88 (95% CI, 0.84-0.93)</li> <li>• Q5, HR: 0.78 (95% CI, 0.74-0.82);<br/>P for trend &lt;.001</li> </ul> | NA |
|  |  | DASH score | Female participants | <ul style="list-style-type: none"> <li>• Q1, 1 [Reference]</li> <li>• Q2, HR: 0.92 (95% CI, 0.88-0.97)</li> </ul>                                                                                                                                                                | NA |

|  |  |          |                     |                                                                                                                                                                                                                                                                                 |    |
|--|--|----------|---------------------|---------------------------------------------------------------------------------------------------------------------------------------------------------------------------------------------------------------------------------------------------------------------------------|----|
|  |  |          |                     | <ul style="list-style-type: none"> <li>• Q3, HR: 0.89 (95% CI, 0.84-0.94)</li> <li>• Q4, HR: 0.83 (95% CI, 0.79-0.87)</li> <li>• Q5, HR: 0.80 (95% CI, 0.75-0.84);<br/>P for trend &lt;.0001</li> </ul>                                                                         |    |
|  |  |          | Male participants   | <ul style="list-style-type: none"> <li>• Q1, 1 [Reference]</li> <li>• Q2, HR: 0.95 (95% CI, 0.91-1.00)</li> <li>• Q3, HR: 0.91 (95% CI, 0.87-0.96)</li> <li>• Q4, HR: 0.86 (95% CI, 0.82-0.90)</li> <li>• Q5 HR: 0.81 (95% CI, 0.77-0.85);<br/>P for trend &lt;.001</li> </ul>  | NA |
|  |  | HEI 2010 | Female participants | <ul style="list-style-type: none"> <li>• Q1, 1 [Reference]</li> <li>• Q2, HR: 0.91 (95% CI, 0.86-0.95)</li> <li>• Q3, HR: 0.90 (95% CI, 0.86-0.95)</li> <li>• Q4, HR: 0.80 (95% CI, 0.76-0.84)</li> <li>• Q5, HR: 0.79 (95% CI, 0.75-0.83);<br/>P for trend &lt;.001</li> </ul> | NA |
|  |  |          | Male participants   | <ul style="list-style-type: none"> <li>• Q1, 1 [Reference]</li> <li>• Q2, HR: 0.89 (95% CI, 0.85-0.93)</li> <li>• Q3, HR: 0.85 (95% CI, 0.81-0.89)</li> <li>• Q4, HR: 0.82 (95% CI, 0.78-0.86)</li> <li>• Q5, HR: 0.75 (95% CI, 0.71-0.79);<br/>P for trend &lt;.001</li> </ul> | NA |

|                                     |           |            |    |                                                                                                                                                                                                                                                                                        |                                   |
|-------------------------------------|-----------|------------|----|----------------------------------------------------------------------------------------------------------------------------------------------------------------------------------------------------------------------------------------------------------------------------------------|-----------------------------------|
| Hashemian et al, <sup>31</sup> 2019 | 42<br>373 | AHEI 2010  | NA | <ul style="list-style-type: none"> <li>• Q1, 1 [Reference]</li> <li>• Q2, HR: 0.95 (95% CI, 0.88-1.05)</li> <li>• Q3, HR: 0.98 (95% CI, 0.89-1.07)</li> <li>• Q4, HR: 0.94 (95% CI, 0.86-1.03)</li> <li>• Q5, HR: 0.88 (95% CI, 0.80-0.97);<br/><i>P</i> for trend = .01</li> </ul>    | Race/ethnicity;<br>alcohol intake |
|                                     |           | aMED       | NA | <ul style="list-style-type: none"> <li>• Q1, 1 [Reference]</li> <li>• Q2, HR: 0.97 (95% CI, 0.90-1.05)</li> <li>• Q3, HR: 0.87 (95% CI, 0.79-0.95)</li> <li>• Q4, HR: 0.87 (95% CI, 0.78-0.96)</li> <li>• Q5, HR: 0.80 (95% CI, 0.70-0.91);<br/><i>P</i> for trend &lt;.001</li> </ul> | NA                                |
|                                     |           | DASH score | NA | <ul style="list-style-type: none"> <li>• Q1, 1 [Reference]</li> <li>• Q2, HR: 0.97 (95% CI, 0.89-1.05)</li> <li>• Q3, HR: 0.90 (95% CI, 0.82-0.98)</li> <li>• Q4, HR: 0.92 (95% CI, 0.84-1.01)</li> <li>• Q5, HR: 0.77 (95% CI, 0.70-0.86);<br/><i>P</i> for trend &lt;.001</li> </ul> | NA                                |
|                                     |           | HEI 2015   | NA | <ul style="list-style-type: none"> <li>• Q1, 1 [Reference]</li> <li>• Q2, HR: 0.96 (95% CI, 0.87-1.05)</li> <li>• Q3, HR: 1.05 (95% CI, 0.96-1.15)</li> </ul>                                                                                                                          | NA                                |

|                                        |           |                                                        |                     |                                                                                                                                                                                                                                                                                        |                                                         |
|----------------------------------------|-----------|--------------------------------------------------------|---------------------|----------------------------------------------------------------------------------------------------------------------------------------------------------------------------------------------------------------------------------------------------------------------------------------|---------------------------------------------------------|
|                                        |           |                                                        |                     | <ul style="list-style-type: none"> <li>• Q4, HR: 0.92 (95% CI, 0.84-1.01)</li> <li>• Q5, HR: 0.92 (95% CI, 0.83-1.01);<br/><i>P</i> for trend = .051</li> </ul>                                                                                                                        |                                                         |
|                                        |           | WCRF/AICR score                                        | NA                  | <ul style="list-style-type: none"> <li>• Q1, 1 [Reference]</li> <li>• Q2, HR: 0.91 (95% CI, 0.81-1.01)</li> <li>• Q3, HR: 0.87 (95% CI, 0.78-0.98)</li> <li>• Q4, HR: 0.87 (95% CI, 0.77-0.98)</li> <li>• Q5, HR: 0.79 (95% CI, 0.70-0.90);<br/><i>P</i> for trend &lt;.001</li> </ul> | NA                                                      |
| Haveman-Nies et al, <sup>32</sup> 2002 | 1251      | Adjusted Mediterranean Diet Score; low (MDS<4) vs high | Female participants | <ul style="list-style-type: none"> <li>• HR: 1.26 (95% CI, 0.88-1.81)</li> </ul>                                                                                                                                                                                                       | Race/ethnicity                                          |
|                                        |           |                                                        | Male participants   | <ul style="list-style-type: none"> <li>• HR: 1.25 (95% CI, 0.93-1.68)</li> </ul>                                                                                                                                                                                                       | NA                                                      |
| Hodge et al, <sup>33</sup> 2011        | 40<br>470 | mMDS                                                   | Female participants | <ul style="list-style-type: none"> <li>• HR: 0.94 (95% CI, 0.92-0.97)</li> </ul>                                                                                                                                                                                                       | Race/ethnicity;<br>smoking status<br>(men)              |
|                                        |           |                                                        | Male participants   | <ul style="list-style-type: none"> <li>• HR: 0.96 (95% CI, 0.93-0.99)</li> </ul>                                                                                                                                                                                                       | NA                                                      |
| Hodge et al, <sup>34</sup> 2018        | 39<br>532 | mMDS                                                   | NA                  | <ul style="list-style-type: none"> <li>• 0-3, 1 [Reference]</li> <li>• 4-6, HR: 0.91 (95% CI, 0.87-0.96)</li> <li>• 7-9, HR: 0.86 (95% CI, 0.80-0.93)</li> <li>• Linear, HR: 0.96 (95% CI, 0.95-0.98); <i>P</i> for trend &lt;.001</li> </ul>                                          | Physical activity;<br>anthropometry<br>; smoking status |
| Hu et al, <sup>35</sup> 2020           | 12<br>413 | AHEI 2010                                              | NA                  | <ul style="list-style-type: none"> <li>• Q1, 1 [Reference]</li> <li>• Q2, HR: 0.95 (95% CI, 0.88-1.03)</li> </ul>                                                                                                                                                                      | Anthropometry                                           |



|  |  |          |    |                                                                                                                                                                                                                                                                                        |    |
|--|--|----------|----|----------------------------------------------------------------------------------------------------------------------------------------------------------------------------------------------------------------------------------------------------------------------------------------|----|
|  |  |          |    | <ul style="list-style-type: none"> <li>• Q3, HR: 0.92 (95% CI, 0.85-1.00)</li> <li>• Q4, HR: 0.84 (95% CI, 0.78-0.92)</li> <li>• Q5, HR: 0.80 (95% CI, 0.73-0.87);<br/><i>P</i> for trend &lt;.001</li> </ul>                                                                          |    |
|  |  | aMED     | NA | <ul style="list-style-type: none"> <li>• Q1, 1 [Reference]</li> <li>• Q2, HR: 0.93 (95% CI, 0.86-1.01)</li> <li>• Q3, HR: 0.93 (95% CI, 0.86-1.01)</li> <li>• Q4, HR: 0.84 (95% CI, 0.77-0.91)</li> <li>• Q5, HR: 0.76 (95% CI, 0.70-0.83);<br/><i>P</i> for trend &lt;.001</li> </ul> | NA |
|  |  | DASH     | NA | <ul style="list-style-type: none"> <li>• Q1, 1 [Reference]</li> <li>• Q2, HR: 0.94 (95% CI, 0.87-1.02)</li> <li>• Q3, HR: 0.96 (95% CI, 0.88-1.03)</li> <li>• Q4, HR: 0.93 (95% CI, 0.85-1.02)</li> <li>• Q5, HR: 0.88 (95% CI, 0.80-0.96);<br/><i>P</i> for trend &lt;.01</li> </ul>  | NA |
|  |  | HEI 2015 | NA | <ul style="list-style-type: none"> <li>• Q1, 1 [Reference]</li> <li>• Q2, HR: 0.90 (95% CI, 0.83-0.97)</li> <li>• Q3, HR: 0.85 (95% CI, 0.78-0.92)</li> <li>• Q4, HR: 0.87 (95% CI, 0.80-0.95)</li> <li>• Q5, HR: 0.82 (95% CI, 0.75-0.89);<br/><i>P</i> for trend &lt;.001</li> </ul> | NA |

|                                    |           |      |                     |                                                                                                                                                                                                                                                                                                                               |                |
|------------------------------------|-----------|------|---------------------|-------------------------------------------------------------------------------------------------------------------------------------------------------------------------------------------------------------------------------------------------------------------------------------------------------------------------------|----------------|
| Hulsegge et al, <sup>36</sup> 2016 | 5623      | mMDS | NA                  | <ul style="list-style-type: none"> <li>Increased mMDS, <math>\Delta</math> from <math>&lt;5</math> at baseline to <math>\geq 5</math> at follow-up, HR: 1.09 (95% CI, 0.73-1.63)</li> <li>Decreased mMDS, <math>\Delta \geq 5</math> at baseline and <math>&lt;5</math> at follow-up, HR: 1.19 (95% CI, 0.72-1.96)</li> </ul> | Race/ethnicity |
| Kaluzza et al, <sup>37</sup> 2009  | 40<br>837 | NRFS | NA                  | <ul style="list-style-type: none"> <li>Low, 1 [Reference]</li> <li>Medium, HR: 1.04 (95% CI, 0.96-1.14)</li> <li>High, HR: 1.21 (95% CI, 1.09-1.34); <math>P</math> for trend = .001</li> </ul>                                                                                                                               | NA             |
|                                    |           | RFS  | NA                  | <ul style="list-style-type: none"> <li>Low, 1 [Reference]</li> <li>Medium, HR: 0.92 (95% CI, 0.85-1.00)</li> <li>High, HR: 0.81 (95% CI, 0.71-0.91); <math>P</math> for trend = .001</li> </ul>                                                                                                                               | NA             |
| Kaluzza et al, <sup>38</sup> 2019  | 68<br>273 | AIDI | Female participants | <ul style="list-style-type: none"> <li>Q1, 1 [Reference]</li> <li>Q2, HR: 0.97 (95% CI, 0.91-1.03)</li> <li>Q3, HR: 0.93 (95% CI, 0.87-0.99)</li> <li>Q4, HR: 0.85 (95% CI, 0.80-0.91); <math>P</math> for trend <math>&lt;.001</math></li> <li>Per 1-point increase, HR: 0.96 (95% CI, 0.95-0.98)</li> </ul>                 | Race/ethnicity |

|                                |           |     |                              |                                                                                                                                                                                                                                                                                                                                                                       |                   |
|--------------------------------|-----------|-----|------------------------------|-----------------------------------------------------------------------------------------------------------------------------------------------------------------------------------------------------------------------------------------------------------------------------------------------------------------------------------------------------------------------|-------------------|
|                                |           |     |                              | <ul style="list-style-type: none"> <li>Per 1-point increase and 20th survival, PD: 0.2 (95% CI, 0.1-0.3)</li> </ul>                                                                                                                                                                                                                                                   |                   |
|                                |           |     | Male participants            | <ul style="list-style-type: none"> <li>Q1, 1 [Reference]</li> <li>Q2, HR: 0.89 (95% CI, 0.85-0.94)</li> <li>Q3, HR: 0.86 (95% CI, 0.81-0.92)</li> <li>Q4, HR: 0.80 (95% CI, 0.75-0.86); <i>P</i> for trend &lt;.001</li> <li>Per 1-point increase, HR: 0.95 (95% CI, 0.94-0.96)</li> <li>Per 1-point increase and survival, 20th PD: 0.2 (95% CI, 0.1-0.3)</li> </ul> | NA                |
|                                |           |     | Female and male participants | <ul style="list-style-type: none"> <li>Q1, 1 [Reference]</li> <li>Q2, HR: 0.93 (95% CI, 0.89-0.97)</li> <li>Q3, HR: 0.89 (95% CI, 0.85-0.93)</li> <li>Q4, HR: 0.82 (95% CI, 0.78-0.86); <i>P</i> for trend &lt;.001</li> <li>Per 1-point increase, HR: 0.96 (95% CI, 0.95-0.97)</li> <li>Per 1-point increase and 20th survival, PD: 0.2 (95% CI, 0.2-0.3)</li> </ul> | NA                |
| Kant et al, <sup>39</sup> 2000 | 42<br>254 | RFS | NA                           | <ul style="list-style-type: none"> <li>Q1, 1 [Reference]</li> <li>Q2, HR: 0.82 (95% CI, 0.73-0.92)</li> <li>Q3, HR: 0.71 (95% CI, 0.62-0.81)</li> </ul>                                                                                                                                                                                                               | Physical activity |

|                                |        |                                            |                     |                                                                                                                                                                                                                                            |                   |
|--------------------------------|--------|--------------------------------------------|---------------------|--------------------------------------------------------------------------------------------------------------------------------------------------------------------------------------------------------------------------------------------|-------------------|
|                                |        |                                            |                     | <ul style="list-style-type: none"> <li>• Q4, HR: 0.69 (95% CI, 0.61-0.78)</li> <li>• <math>\chi^2</math>-trend 35.64; <i>P</i> for trend &lt;.001</li> </ul>                                                                               |                   |
| Kant et al, <sup>40</sup> 2004 | 10 084 | RFBS [9-11, 12-14, $\geq 15$ vs 0-8]       | Female participants | <ul style="list-style-type: none"> <li>• 0-8, 1 [Reference]</li> <li>• 9-11, RR: 0.95 (95% CI, 0.76-1.18)</li> <li>• 12-14, RR: 0.80 (95% CI, 0.64-1.02)</li> <li>• 15, RR: 0.80 (95% CI, 0.61-1.04); <i>P</i> for trend = .04</li> </ul>  | Physical activity |
|                                |        |                                            | Male participants   | <ul style="list-style-type: none"> <li>• 0-8, 1 [Reference]</li> <li>• 9-11, RR: 0.88 (95% CI, 0.72-1.08)</li> <li>• 12-14, RR: 0.84 (95% CI, 0.68-1.03)</li> <li>• 15, RR: 0.72 (95% CI, 0.56-0.92); <i>P</i> for trend = .001</li> </ul> | NA                |
|                                |        | Fruit, vegetable, whole grain <sup>e</sup> | Female participants | <ul style="list-style-type: none"> <li>• Q1, 1 [Reference]</li> <li>• Q2, RR: 0.89 (95% CI, 0.72-1.08)</li> <li>• Q3, RR: 0.81 (95% CI, 0.64-1.02)</li> <li>• Q4, RR: 0.87 (95% CI, 0.67-1.11); <i>P</i> for trend = .09</li> </ul>        | NA                |
|                                |        |                                            | Male participants   | <ul style="list-style-type: none"> <li>• Q1, 1 [Reference]</li> <li>• Q2, RR: 0.92 (95% CI, 0.74-1.13)</li> </ul>                                                                                                                          | NA                |

|  |  |                        |                     |                                                                                                                                                                                                                                       |    |
|--|--|------------------------|---------------------|---------------------------------------------------------------------------------------------------------------------------------------------------------------------------------------------------------------------------------------|----|
|  |  |                        |                     | <ul style="list-style-type: none"> <li>• Q3, RR: 0.84 (95% CI, 0.68-1.06)</li> <li>• Q4, RR: 0.74 (95% CI, 0.57-0.95);<br/><i>P</i> for trend = .002</li> </ul>                                                                       |    |
|  |  | Ethnic <sup>e</sup>    | Female participants | <ul style="list-style-type: none"> <li>• NS, data NR</li> </ul>                                                                                                                                                                       | NA |
|  |  |                        | Male participants   | <ul style="list-style-type: none"> <li>• NS, data NR</li> </ul>                                                                                                                                                                       | NA |
|  |  | Low-fat <sup>e</sup>   | Female participants | <ul style="list-style-type: none"> <li>• NS, data NR</li> </ul>                                                                                                                                                                       | NA |
|  |  |                        | Male participants   | <ul style="list-style-type: none"> <li>• NS, data NR</li> </ul>                                                                                                                                                                       | NA |
|  |  | Cluster 1 <sup>e</sup> | Female participants | <ul style="list-style-type: none"> <li>• Cluster 1, 1 [Reference]</li> </ul>                                                                                                                                                          | NA |
|  |  | Cluster 2 <sup>e</sup> |                     | <ul style="list-style-type: none"> <li>• Cluster 2, RR: 0.93 (95% CI, 0.75-1.16)</li> </ul>                                                                                                                                           |    |
|  |  | Cluster 3 <sup>e</sup> |                     | <ul style="list-style-type: none"> <li>• Cluster 3, RR: 0.93 (95% CI, 0.74-1.17)</li> </ul>                                                                                                                                           |    |
|  |  | Cluster 4 <sup>e</sup> |                     | <ul style="list-style-type: none"> <li>• Cluster 4, RR: 0.88 (95% CI, 0.72-1.09)</li> </ul>                                                                                                                                           |    |
|  |  |                        |                     |                                                                                                                                                                                                                                       |    |
|  |  |                        | Male participants   | <ul style="list-style-type: none"> <li>• Cluster 1, 1 [Reference]</li> <li>• Cluster 2, RR: 0.94 (95% CI, 0.76-1.16)</li> <li>• Cluster 3, RR: 0.87 (95% CI, 0.71-1.07)</li> <li>• Cluster 4, RR: 0.82 (95% CI, 0.66-1.01)</li> </ul> | NA |

|                                    |            |     |                     |                                                                                                                                                                                                                                                                                        |    |
|------------------------------------|------------|-----|---------------------|----------------------------------------------------------------------------------------------------------------------------------------------------------------------------------------------------------------------------------------------------------------------------------------|----|
| Kant et al, <sup>41</sup> 2009     | 350<br>886 | DBS | Female participants | <ul style="list-style-type: none"> <li>• Q1, 1 [Reference]</li> <li>• Q2, RR: 0.90 (95% CI, 0.85-0.95)</li> <li>• Q3, RR: 0.87 (95% CI, 0.82-0.93)</li> <li>• Q4, RR: 0.80 (95% CI, 0.75-0.86)</li> <li>• Q5, RR: 0.75 (95% CI, 0.70-0.80);<br/><i>P</i> for trend &lt;.001</li> </ul> | NA |
|                                    |            |     | Male participants   | <ul style="list-style-type: none"> <li>• Q1, 1 [Reference]</li> <li>• Q2, RR: 0.90 (95% CI, 0.86-0.94)</li> <li>• Q3, RR: 0.88 (95% CI, 0.85-0.92)</li> <li>• Q4, RR: 0.83 (95% CI, 0.79-0.87)</li> <li>• Q5, RR: 0.79 (95% CI, 0.75-0.83);<br/><i>P</i> for trend &lt;.001</li> </ul> | NA |
| Kappeler et al, <sup>42</sup> 2013 | 17<br>611  | HEI | Female participants | <ul style="list-style-type: none"> <li>• HEI: &lt;51, Poor, HR: 1.00</li> <li>• HEI: 51-80, Needs Improvement, HR: 1.00 (95% CI, 0.73-1.36)</li> <li>• HEI: &gt;80, Good, HR: 0.88 (95% CI, 0.65-1.20); <i>P</i> for trend = .29</li> </ul>                                            | NA |
|                                    |            |     | Male participants   | <ul style="list-style-type: none"> <li>• HEI: &lt;51, Poor, 1 [Reference]</li> <li>• HEI: 51-80, Needs Improvement, HR: 0.85 (95% CI, 0.70-1.04)</li> <li>• HEI: &gt;80, Good, HR: 0.70 (95% CI, 0.52-0.96); <i>P</i> for trend = .02</li> </ul>                                       | NA |

|                               |        |                    |                                                                                  |                                                                                                                                                                                                                                                  |    |
|-------------------------------|--------|--------------------|----------------------------------------------------------------------------------|--------------------------------------------------------------------------------------------------------------------------------------------------------------------------------------------------------------------------------------------------|----|
|                               |        |                    | Female and male participants                                                     | <ul style="list-style-type: none"> <li>• HEI: &lt;51, Poor, 1 [Reference]</li> <li>• HEI: 51-80, Needs Improvement, HR: 0.90 (95% CI, 0.75-1.08)</li> <li>• HEI: &gt;80, Good, HR: 0.77 (95% CI, 0.63-0.94); <i>P</i> for trend = .01</li> </ul> | NA |
| Kim et al, <sup>43</sup> 2013 | 12 538 | Healthy diet score | NA                                                                               | <ul style="list-style-type: none"> <li>• &lt;2 components, 1 [Reference]</li> <li>• ≥2 components, HR: 0.81 (95% CI, 0.57-1.14)</li> </ul>                                                                                                       | NA |
| Kim et al, <sup>44</sup> 2018 | 11 879 | hPDI               | Female participants                                                              | <ul style="list-style-type: none"> <li>• ≥Median, HR: 0.94 (95% CI, 0.88-0.99)</li> <li>• &lt;Median, HR: 1.09 (95% CI, 0.98-1.19)</li> </ul>                                                                                                    | NA |
|                               |        |                    | Male participants                                                                | <ul style="list-style-type: none"> <li>• &lt;Median, HR: 1.01 (95% CI, 0.92-1.10)</li> <li>• ≥Median, HR: 0.95 (95% CI, 0.89-1.01)</li> </ul>                                                                                                    | NA |
|                               |        |                    | Female and male participants                                                     | <ul style="list-style-type: none"> <li>• ≥Median, HR: 0.95 (95% CI, 0.91-0.98)</li> <li>• &lt;Median, HR: 1.04 (95% CI, 0.97-1.12)</li> </ul>                                                                                                    | NA |
|                               |        | uPDI               | Female participants                                                              | <ul style="list-style-type: none"> <li>• HR: 1.01 (95% CI, 0.98-1.05)</li> </ul>                                                                                                                                                                 | NA |
|                               |        | Male participants  | <ul style="list-style-type: none"> <li>• HR: 1.01 (95% CI, 0.98-1.06)</li> </ul> | NA                                                                                                                                                                                                                                               |    |

|                               |           |                            |                              |                                                                                                                                                                                                                                                                           |    |
|-------------------------------|-----------|----------------------------|------------------------------|---------------------------------------------------------------------------------------------------------------------------------------------------------------------------------------------------------------------------------------------------------------------------|----|
|                               |           |                            | Female and male participants | <ul style="list-style-type: none"> <li>HR: 1.00 (95% CI, 0.98-1.04)</li> </ul>                                                                                                                                                                                            | NA |
|                               |           | PDI                        | Female participants          | <ul style="list-style-type: none"> <li>HR: 0.98 (95% CI, 0.95-1.00)</li> </ul>                                                                                                                                                                                            | NA |
|                               |           |                            | Male participants            | <ul style="list-style-type: none"> <li>HR: 1.04 (95% CI, 0.99-1.07)</li> </ul>                                                                                                                                                                                            | NA |
|                               |           |                            | Female and male participants | <ul style="list-style-type: none"> <li>HR: 1.01 (95% CI, 0.98-1.03)</li> </ul>                                                                                                                                                                                            | NA |
| Kim et al, <sup>45</sup> 2019 | 12<br>168 | hPDI                       | NA                           | <ul style="list-style-type: none"> <li>Q1, 1 [Reference]</li> <li>Q2, HR: 0.99 (95% CI, 0.91-1.07)</li> <li>Q3, HR: 0.99 (95% CI, 0.91-1.08)</li> <li>Q4, HR: 0.93 (95% CI, 0.85-1.02)</li> <li>Q5, HR: 0.91 (95% CI, 0.83-1.00);<br/><i>P</i> for trend = .03</li> </ul> | NA |
|                               |           | uPDI                       | NA                           | <ul style="list-style-type: none"> <li>Q1, 1 [Reference]</li> <li>Q2, HR: 1.04 (95% CI, 0.96-1.12)</li> <li>Q3, HR: 0.97 (95% CI, 0.89-1.05)</li> <li>Q4, HR: 1.01 (95% CI, 0.93-1.10)</li> <li>Q5, HR: 1.02 (95% CI, 0.94-1.11);<br/><i>P</i> for trend = .67</li> </ul> | NA |
|                               |           | Provegetarian food pattern | NA                           | <ul style="list-style-type: none"> <li>Q1, 1 [Reference]</li> <li>Q2, HR: 0.92 (95% CI, 0.85-0.99)</li> <li>Q3, HR: 0.89 (95% CI, 0.82-0.97)</li> </ul>                                                                                                                   | NA |



|                                    |           |                           |    |                                                                                                                                                                                                                                                                                        |                |
|------------------------------------|-----------|---------------------------|----|----------------------------------------------------------------------------------------------------------------------------------------------------------------------------------------------------------------------------------------------------------------------------------------|----------------|
|                                    |           |                           |    | <ul style="list-style-type: none"> <li>• Q4, HR: 0.84 (95% CI, 0.77-0.91)</li> <li>• Q5, HR: 0.82 (95% CI, 0.76-0.89);<br/><i>P</i> for trend &lt;.001</li> </ul>                                                                                                                      |                |
|                                    |           | PDI                       | NA | <ul style="list-style-type: none"> <li>• Q1, 1 [Reference]</li> <li>• Q2, HR: 0.89 (95% CI, 0.83-0.97)</li> <li>• Q3, HR: 0.82 (95% CI, 0.76-0.89)</li> <li>• Q4, HR: 0.82 (95% CI, 0.75-0.89)</li> <li>• Q5, HR: 0.76 (95% CI, 0.69-0.83);<br/><i>P</i> for trend &lt;.001</li> </ul> | NA             |
| Knoops et al, <sup>46</sup> 2004   | 2339      | mMDS                      | NA | <ul style="list-style-type: none"> <li>• HR: 0.77 (95% CI, 0.68-0.88)</li> </ul>                                                                                                                                                                                                       | Race/ethnicity |
| Knoops et al, <sup>47</sup> 2006   | 3117      | mMDS                      | NA | <ul style="list-style-type: none"> <li>• HR: 0.82 (95% CI, 0.75-0.91); <i>P</i> &lt; .05</li> <li>• Removing alcohol, HR: 0.78 (95% CI, 0.71-0.87); <i>P</i> &lt; .05</li> </ul>                                                                                                       | Race/ethnicity |
|                                    |           | MAI                       | NA | <ul style="list-style-type: none"> <li>• HR: 0.83 (95% CI, 0.75-0.92); <i>P</i> &lt; .05</li> <li>• Removing alcohol, HR: 0.87 (95% CI, 0.79-0.97); <i>P</i> &lt; .05</li> </ul>                                                                                                       | NA             |
| Kurotani et al, <sup>48</sup> 2016 | 79<br>594 | Japanese Food Guide score | NA | <ul style="list-style-type: none"> <li>• Q1, 1 [Reference]</li> <li>• Q2, HR: 0.92 (95% CI, 0.87-0.97)</li> <li>• Q3, HR: 0.88 (95% CI, 0.83-0.93)</li> </ul>                                                                                                                          | Race/ethnicity |

|                                    |           |                                                         |         |                                                                                                                                                                                                                                                                                                                  |                |
|------------------------------------|-----------|---------------------------------------------------------|---------|------------------------------------------------------------------------------------------------------------------------------------------------------------------------------------------------------------------------------------------------------------------------------------------------------------------|----------------|
|                                    |           |                                                         |         | <ul style="list-style-type: none"> <li>• Q4, HR: 0.85 (95% CI, 0.7-0.91); <i>P</i> for trend &lt;.001</li> <li>• Per 10-point increment, HR: 0.93 (95% CI, 0.91-0.95)</li> </ul>                                                                                                                                 |                |
|                                    |           | Modified Japanese Food Guide score                      | NA      | <ul style="list-style-type: none"> <li>• Q1, 1 [Reference]</li> <li>• Q2, HR: 0.93 (95% CI, 0.89-0.98)</li> <li>• Q3, HR: 0.84 (95% CI, 0.79-0.89)</li> <li>• Q4, HR: 0.82 (95% CI, 0.77-0.88); <i>P</i> for trend &lt;.001</li> <li>• Continuous by 10-point increment, HR: 0.93 (95% CI, 0.91-0.95)</li> </ul> | NA             |
| Kurotani et al, <sup>33</sup> 2019 | 61<br>267 | Japanese Food Guide, according to Japanese ADI tertiles | <Median | <ul style="list-style-type: none"> <li>• T1 ADI, 1 [Reference]</li> <li>• T2 ADI, HR: 1.17 (95% CI, 1.08-1.27)</li> <li>• T3 ADI, HR: 1.19 (95% CI, 1.08-1.32)</li> <li>• Across ADI tertiles, <i>P</i> for trend = .03</li> </ul>                                                                               | Alcohol intake |
|                                    |           |                                                         | ≥Median | <ul style="list-style-type: none"> <li>• T1 ADI, HR: 1.09 (95% CI, 0.99-1.19)</li> <li>• T2 ADI, HR: 1.01 (95% CI, 0.93-1.10)</li> <li>• T3 ADI, HR: 1.05 (95% CI, 0.96-1.16)</li> </ul>                                                                                                                         | NA             |

|                                    |            |            |    |                                                                                                                                                                                                                                                                          |                                              |
|------------------------------------|------------|------------|----|--------------------------------------------------------------------------------------------------------------------------------------------------------------------------------------------------------------------------------------------------------------------------|----------------------------------------------|
|                                    |            |            |    | <ul style="list-style-type: none"> <li>Across ADI tertiles, <i>P</i> for trend = .92</li> </ul>                                                                                                                                                                          |                                              |
| Lagiou et al, <sup>50</sup> 2006   | 42<br>237  | MDS        | NA | <ul style="list-style-type: none"> <li>Per 2-unit increase, HR: 0.93 (95% CI, 0.83-1.03); <i>P</i> for trend = .18</li> <li>Low (0-3), 1 [Reference]</li> <li>Middle (4-5), HR: 0.93 (95% CI, 0.78-1.13)</li> <li>High (6-9), HR: 0.85 (95% CI, 0.67-1.08)</li> </ul>    | Race/ethnicity;<br>alcohol intake<br>NR      |
| Lasheras et al, <sup>51</sup> 2000 | 161        | mMDS       | NA | <ul style="list-style-type: none"> <li>&lt;80 y, n = 74, HR: 0.69 (95% CI, 0.43-0.93); <i>P</i> = .03</li> <li>≥80 y, n = 87, HR: 1.24 (95% CI, 0.60-2.53); <i>P</i> = .55</li> </ul>                                                                                    | Race/ethnicity;<br>SES:<br>institutionalized |
| Lassale et al, <sup>52</sup> 2016  | 451<br>256 | DASH score | NA | <ul style="list-style-type: none"> <li>Q1, 1 [Reference]</li> <li>Q2, HR: 0.90 (95% CI, 0.87-0.94)</li> <li>Q3, HR: 0.85 (95% CI, 0.81-0.89)</li> <li>Q4, HR: 0.82 (95% CI, 0.78-0.86)</li> <li>Q5, HR: 0.92 (95% CI, 0.90-0.93); <i>P</i> for trend &lt;.001</li> </ul> | NA                                           |
|                                    |            | MDS        | NA | <ul style="list-style-type: none"> <li>Q1, 1 [Reference]</li> <li>Q2, HR: 0.90 (95% CI, 0.86-0.94)</li> <li>Q3, HR: 0.84 (95% CI, 0.81-0.88)</li> <li>Q4, HR: 0.79 (95% CI, 0.76-0.83)</li> </ul>                                                                        | NA                                           |

|  |  |                                           |    |                                                                                                                                                                                                                                                                                        |    |
|--|--|-------------------------------------------|----|----------------------------------------------------------------------------------------------------------------------------------------------------------------------------------------------------------------------------------------------------------------------------------------|----|
|  |  |                                           |    | <ul style="list-style-type: none"> <li>• Q5, HR: 0.91 (95% CI, 0.90-0.93);<br/><i>P</i> for trend &lt;.001</li> </ul>                                                                                                                                                                  |    |
|  |  | Mediterranean-style dietary pattern score | NA | <ul style="list-style-type: none"> <li>• Q1, 1 [Reference]</li> <li>• Q2, HR: 0.92 (95% CI, 0.89-0.96)</li> <li>• Q3, HR: 0.88 (95% CI, 0.84-0.92)</li> <li>• Q4, HR: 0.80 (95% CI, 0.76-0.84)</li> <li>• Q5, HR: 0.92 (95% CI, 0.90-0.93);<br/><i>P</i> for trend &lt;.001</li> </ul> | NA |
|  |  | Relative Mediterranean diet score         | NA | <ul style="list-style-type: none"> <li>• Q1, 1 [Reference]</li> <li>• Q2, HR: 0.87 (95% CI, 0.83-0.91)</li> <li>• Q3, HR: 0.81 (95% CI, 0.77-0.84)</li> <li>• Q4, HR: 0.77 (95% CI, 0.73-0.81)</li> <li>• Q5, HR: 0.89 (95% CI, 0.88-0.91);<br/><i>P</i> for trend &lt;.001</li> </ul> | NA |
|  |  | DQI-I                                     | NA | <ul style="list-style-type: none"> <li>• Q1, 1 [Reference]</li> <li>• Q2, HR: 0.89 (95% CI, 0.85-0.93)</li> <li>• Q3, HR: 0.81 (95% CI, 0.77-0.85)</li> <li>• Q4, HR: 0.75 (95% CI, 0.72-0.79)</li> <li>• Q5, HR: 0.90 (95% CI, 0.88-0.91);<br/><i>P</i> for trend &lt;.001</li> </ul> | NA |
|  |  | HEI 2010                                  | NA | <ul style="list-style-type: none"> <li>• Q1, 1 [Reference]</li> <li>• Q2, HR: 0.89 (95% CI, 0.85-0.93)</li> </ul>                                                                                                                                                                      | NA |

|                               |            |          |    |                                                                                                                                                                                                                                                                                        |                   |
|-------------------------------|------------|----------|----|----------------------------------------------------------------------------------------------------------------------------------------------------------------------------------------------------------------------------------------------------------------------------------------|-------------------|
|                               |            |          |    | <ul style="list-style-type: none"> <li>• Q3, HR: 0.84 (95% CI, 0.80-0.88)</li> <li>• Q4, HR: 0.82 (95% CI, 0.78-0.86)</li> <li>• Q5, HR: 0.91 (95% CI, 0.90-0.93);<br/><i>P</i> for trend &lt;.001</li> </ul>                                                                          |                   |
|                               |            | HNFI     | NA | <ul style="list-style-type: none"> <li>• Q1, 1 [Reference]</li> <li>• Q2, HR: 0.94 (95% CI, 0.90-0.98)</li> <li>• Q3, HR: 0.87 (95% CI, 0.83-0.91)</li> <li>• Q4, HR: 0.83 (95% CI, 0.79-0.87)</li> <li>• Q5, HR: 0.93 (95% CI, 0.92-0.95);<br/><i>P</i> for trend &lt;.001</li> </ul> | NA                |
|                               |            | HLL-Diet | NA | <ul style="list-style-type: none"> <li>• Q1, 1 [Reference]</li> <li>• Q2, HR: 0.91 (95% CI, 0.88-0.96)</li> <li>• Q3, HR: 0.86 (95% CI, 0.83-0.90)</li> <li>• Q4, HR: 0.83 (95% CI, 0.79-0.87)</li> <li>• Q5, HR: 0.93 (95% CI, 0.92-0.95);<br/><i>P</i> for trend &lt;.001</li> </ul> | NA                |
| Lim et al, <sup>53</sup> 2018 | 134<br>541 | DQI-K    | NA | <ul style="list-style-type: none"> <li>• Higher diet quality, 0-4, 1 [Reference]</li> <li>• Poorer diet quality, 5-9, HR: 1.23 (95% CI, 1.06-1.43)</li> <li>• Per-unit increase, HR: 1.06 (95% CI, 1.02-1.11)</li> </ul>                                                               | Physical activity |

|                                    |           |                     |    |                                                                                                                                                                                                                         |                                        |
|------------------------------------|-----------|---------------------|----|-------------------------------------------------------------------------------------------------------------------------------------------------------------------------------------------------------------------------|----------------------------------------|
| Limongi et al, <sup>54</sup> 2017  | 2665      | Mediterranean score | NA | <ul style="list-style-type: none"> <li>At ~ 4 y follow-up</li> <li>T1, 1 [Reference]</li> <li>T2, data NR</li> <li>T3, HR: 0.62 (95% CI, 0.42-0.92); <math>P = .03</math></li> </ul>                                    | Race/ethnicity; physical activity      |
|                                    |           |                     |    | <ul style="list-style-type: none"> <li>At ~ 8 y follow-up:</li> <li>T1, 1 [Reference]</li> <li>T2, HR: 0.72 (95% CI, 0.54-0.97)</li> <li>T3, HR: 0.66 (95% CI, 0.49-0.90); <math>P &lt; .01</math></li> </ul>           |                                        |
| Liu et al, <sup>55</sup> 2019      | 1990      | DST                 | NA | <ul style="list-style-type: none"> <li>Low, 1 [Reference]</li> <li>Moderate, HR: 0.93 (95% CI, 0.81-1.07)</li> <li>High, HR: 0.76 (95% CI, 0.59-0.97); <math>P</math> for trend = .04</li> </ul>                        | SES; alcohol intake; physical activity |
| Loprinzi et al, <sup>56</sup> 2018 | 1369      | AHEI 2005           | NA | <ul style="list-style-type: none"> <li>Per-unit increase, HR: 0.97 (95% CI, 0.96-0.99); <math>P = .004</math></li> <li>Meeting dietary guidelines vs not, HR: 0.60 (95% CI, 0.38-0.97); <math>P = .03</math></li> </ul> | NA                                     |
| Mai et al, <sup>57</sup> 2005      | 42<br>254 | RFS                 | NA | <ul style="list-style-type: none"> <li>Q1, 1 [Reference]</li> <li>Q2, HR: 0.87 (95% CI, 0.80-0.95)</li> </ul>                                                                                                           | NA                                     |

|                                                |           |                               |                                    |                                                                                                                                                                                                                                                                                                                                                                  |                                  |
|------------------------------------------------|-----------|-------------------------------|------------------------------------|------------------------------------------------------------------------------------------------------------------------------------------------------------------------------------------------------------------------------------------------------------------------------------------------------------------------------------------------------------------|----------------------------------|
|                                                |           |                               |                                    | <ul style="list-style-type: none"> <li>• Q3, HR: 0.78 (95% CI, 0.71-0.86)</li> <li>• Q4, HR: 0.80 (95% CI, 0.73-0.88);<br/><i>P</i> for trend &lt;.001</li> </ul>                                                                                                                                                                                                |                                  |
| Martínez-Gómez et al, <sup>58</sup><br>2013    | 3465      | Healthy diet score            | NA                                 | <ul style="list-style-type: none"> <li>• &lt;Median, 1 [Reference]</li> <li>• ≥Median, HR: 0.79 (95% CI, 0.79-0.89)</li> </ul>                                                                                                                                                                                                                                   | NA                               |
| Martínez-González et al, <sup>59</sup><br>2012 | 15<br>535 | MDS                           | Female and<br>male<br>participants | <ul style="list-style-type: none"> <li>• Low, 1 [Reference]</li> <li>• Moderate, HR: 0.58 (95% CI,<br/>0.34-0.99)</li> <li>• High, HR: 0.38 (95% CI, 0.21-<br/>0.70)</li> <li>• Per-unit increase, HR: 0.72 (95%<br/>CI, 0.58-0.91); <i>P</i> for trend = .006</li> </ul>                                                                                        | Race/ethnicity                   |
|                                                |           |                               | Female<br>participants             | <ul style="list-style-type: none"> <li>• HR: 0.83 (95% CI, 0.53-1.29); <i>P</i> =<br/>.41</li> </ul>                                                                                                                                                                                                                                                             |                                  |
| Martínez-González et al, <sup>60</sup><br>2014 | 7216      | Provegetarian food<br>pattern | NA                                 | <ul style="list-style-type: none"> <li>• Very low, &lt;30, 1 [Reference]</li> <li>• Low, 30-34, HR: 0.71 (95% CI,<br/>0.50-1.02)</li> <li>• Moderate, 35-39, HR: 0.68 (95%<br/>CI, 0.48-0.96)</li> <li>• High, 40+, HR: 0.59 (95% CI,<br/>0.40-0.88); <i>P</i> for trend = .03</li> <li>• Yearly updated, low 30-34, RR:<br/>0.76 (95% CI, 0.53-1.10)</li> </ul> | Race/ethnicity;<br>anthropometry |

|                                      |            |                    |                     |                                                                                                                                                                                                                                                                                                             |    |
|--------------------------------------|------------|--------------------|---------------------|-------------------------------------------------------------------------------------------------------------------------------------------------------------------------------------------------------------------------------------------------------------------------------------------------------------|----|
|                                      |            |                    |                     | <ul style="list-style-type: none"> <li>Yearly updated, moderate 35-39, RR: 0.79 (95% CI, 0.55-1.13)</li> <li>Yearly updated, high 40+, RR: 0.59 (95% CI, 0.39-0.89); <i>P</i> for trend = .03</li> </ul>                                                                                                    |    |
|                                      |            |                    |                     | <ul style="list-style-type: none"> <li>Q1, &lt;33, 1 [Reference]</li> <li>Q2, 33-35, HR: 0.98 (95% CI, 0.72-1.32)</li> <li>Q3, 36-37, HR: 0.81 (95% CI, 0.57-1.14)</li> <li>Q4, 38-40, HR: 0.70 (95% CI, 0.49-0.99)</li> <li>Q5: &gt;40, HR: 0.66 (95% CI, 0.46-0.96); <i>P</i> for trend = .006</li> </ul> |    |
| McCullough et al, <sup>61</sup> 2011 | 111<br>966 | Healthy diet score | Female participants | <ul style="list-style-type: none"> <li>&lt;3 score, 1 [Reference]</li> <li>3-5 score, RR: 0.91 (95% CI, 0.85-0.98)</li> <li>+6 score, RR: 0.85 (95% CI, 0.79-0.90); <i>P</i> for trend &lt;.001</li> </ul>                                                                                                  | NA |
|                                      |            |                    | Male participants   | <ul style="list-style-type: none"> <li>&lt;3 score, 1 [Reference]</li> <li>3-5 score, RR: 0.90 (95% CI, 0.86-0.95)</li> <li>+6 score, RR: 0.89 (95% CI, 0.84-0.93); <i>P</i> for trend &lt;.001</li> </ul>                                                                                                  | NA |



|                                      |     |                    |    |                                                                                                                                                                                                                                                                |                |
|--------------------------------------|-----|--------------------|----|----------------------------------------------------------------------------------------------------------------------------------------------------------------------------------------------------------------------------------------------------------------|----------------|
| McNaughton et al, <sup>62</sup> 2012 | 972 | MDS                | NA | <ul style="list-style-type: none"> <li>• Q1, 1 [Reference]</li> <li>• Q2, HR: 1.04 (95% CI, 0.85-1.27)</li> <li>• Q3, HR: 0.77 (95% CI, 0.61-0.97)</li> <li>• Q4, HR: 0.78 (95% CI, 0.62-0.98);<br/><i>P</i> for trend = .006</li> </ul>                       | Race/ethnicity |
|                                      |     | RFS                | NA | <ul style="list-style-type: none"> <li>• RFS score</li> <li>• Q1, 1 [Reference]</li> <li>• Q2, HR: 0.90 (95% CI, 0.74-1.10)</li> <li>• Q3, HR: 0.76 (95% CI, 0.61-0.96)</li> <li>• Q4, HR: 0.67 (95% CI, 0.52-0.86);<br/><i>P</i> for trend = .001</li> </ul>  | NA             |
|                                      |     |                    |    | <ul style="list-style-type: none"> <li>• RFS median</li> <li>• Q1, 1 [Reference]</li> <li>• Q2, HR: 0.78 (95% CI, 0.64-0.94)</li> <li>• Q3, HR: 0.85 (95% CI, 0.68-1.07)</li> <li>• Q4, HR: 0.63 (95% CI, 0.48-0.83);<br/><i>P</i> for trend = .003</li> </ul> |                |
|                                      |     | Healthy diet score | NA | <ul style="list-style-type: none"> <li>• Q1, 1 [Reference]</li> <li>• Q2, HR: 1.10 (95% CI, 0.90-1.35)</li> <li>• Q3, HR: 0.98 (95% CI, 0.79-1.22)</li> <li>• Q4, HR: 0.99 (95% CI, 0.79-1.24);<br/><i>P</i> for trend = .80</li> </ul>                        | NA             |

|                                      |           |      |    |                                                                                                                                                                                                                                                                                                                                                               |                                                                                               |
|--------------------------------------|-----------|------|----|---------------------------------------------------------------------------------------------------------------------------------------------------------------------------------------------------------------------------------------------------------------------------------------------------------------------------------------------------------------|-----------------------------------------------------------------------------------------------|
| Menotti et al, <sup>124</sup> 2012   | 1139      | MAI  | NA | <ul style="list-style-type: none"> <li>• 20 y follow-up, HR: 0.74 (95% CI, 0.55-0.99)</li> <li>• 40 y follow-up, HR: 0.79 (95% CI, 0.64-0.97)</li> </ul>                                                                                                                                                                                                      | Race/ethnicity;<br>SES                                                                        |
| Menotti et al, <sup>64</sup> 2017    | 12<br>696 | MAI  | NA | <ul style="list-style-type: none"> <li>• Death rates over 50 y follow-up, <math>r = -0.62</math>; <math>P &lt; .05</math></li> <li>• Death rates over 50 y Follow-up, using 25 y rates, <math>r = 0.98</math>; <math>P</math> value NR</li> <li>• Death rates over 50 y follow-up, using 45 y rates, <math>r = .99</math>; <math>P</math> value NR</li> </ul> | Race/ethnicity;<br>alcohol intake;<br>physical activity;<br>anthropometry<br>; smoking status |
| Michels and Wolk, <sup>65</sup> 2002 | 59<br>038 | NRFS | NA | <ul style="list-style-type: none"> <li>• Q1, 1 [Reference]</li> <li>• Q2, HR: 1.00 (95% CI, 0.90-1.11)</li> <li>• Q3, HR: 0.98 (95% CI, 0.88-1.09)</li> <li>• Q4, HR: 0.98 (95% CI, 0.87-1.11)</li> <li>• Q5, HR: 1.07 (95% CI, 0.88-1.31); <math>P</math> for trend = .92</li> </ul>                                                                         | Race/ethnicity;<br>physical activity;<br>smoking status                                       |
|                                      |           | RFS  | NA | <ul style="list-style-type: none"> <li>• Q1, 1 [Reference]</li> <li>• Q2, HR: 0.79 (95% CI, 0.70-0.88)</li> <li>• Q3, HR: 0.71 (95% CI, 0.63-0.80)</li> <li>• Q4, HR: 0.64 (95% CI, 0.57-0.72)</li> <li>• Q5, HR: 0.58 (95% CI, 0.50-0.68); <math>P</math> for trend <math>&lt; .001</math></li> </ul>                                                        | NA                                                                                            |

|                                    |            |                                      |                     |                                                                                                                                                                                                                                                     |                |
|------------------------------------|------------|--------------------------------------|---------------------|-----------------------------------------------------------------------------------------------------------------------------------------------------------------------------------------------------------------------------------------------------|----------------|
| Mitrou et al, <sup>66</sup> 2007   | 380<br>296 | MDS                                  | Female participants | <ul style="list-style-type: none"> <li>HR: 0.84 (95% CI, 0.79-0.89)</li> </ul>                                                                                                                                                                      | NA             |
|                                    |            |                                      | Male participants   | <ul style="list-style-type: none"> <li>HR: 0.79 (95% CI, 0.76-0.82)</li> </ul>                                                                                                                                                                      | NA             |
|                                    |            | Traditional Mediterranean diet score | Female participants | <ul style="list-style-type: none"> <li>0-3, 1 [Reference]</li> <li>4-5, HR: 0.89 (95% CI, 0.85-0.93)</li> <li>6-9, HR: 0.80 (95% CI, 0.75-0.85);<br/><i>P</i> for trend &lt;.001</li> </ul>                                                         | NA             |
|                                    |            |                                      | Male participants   | <ul style="list-style-type: none"> <li>0-3, 1 [Reference]</li> <li>4-5, HR: 0.91 (95% CI, 0.88-0.94)</li> <li>6-9, HR: 0.79 (95% CI, 0.76-0.83);<br/><i>P</i> for trend &lt;.001</li> </ul>                                                         | NA             |
| Mokhtari et al, <sup>67</sup> 2019 | 48<br>633  | DASH score                           | Female participants | <ul style="list-style-type: none"> <li>DS 9-20, 1 [Reference]</li> <li>DS 21-25, HR: 0.92 (95% CI, 0.84-1.02)</li> <li>DS 26-30, HR: 0.86 (95% CI, 0.77- 0.97)</li> <li>DS 31-39, HR: 0.90 (95% CI, 0.75-0.99); <i>P</i> for trend = .03</li> </ul> | Alcohol intake |
|                                    |            |                                      | Male participants   | <ul style="list-style-type: none"> <li>DS 9-20, 1 [Reference]</li> <li>DS 21-25, HR: 0.94 (95% CI, 0.86-1.02)</li> <li>DS 26-30, HR: 0.87 (95% CI, 0.79-0.96)</li> </ul>                                                                            | NA             |

|                                  |            |                             |                              |                                                                                                                                                                                                                                                                                                                    |                     |
|----------------------------------|------------|-----------------------------|------------------------------|--------------------------------------------------------------------------------------------------------------------------------------------------------------------------------------------------------------------------------------------------------------------------------------------------------------------|---------------------|
|                                  |            |                             |                              | <ul style="list-style-type: none"> <li>• DS 31-39, HR: 0.82 (95% CI, 0.68-0.98); <i>P</i> for trend = .003</li> </ul>                                                                                                                                                                                              |                     |
|                                  |            |                             | Female and male participants | <ul style="list-style-type: none"> <li>• DS 9-20, 1 [Reference]</li> <li>• DS 21-25, HR: 0.94 (95% CI, 0.88-1.00)</li> <li>• DS 26-30, HR: 0.87 (95% CI, 0.81-0.94)</li> <li>• DS 31-39, HR: 0.86 (95% CI, 0.75-0.98); <i>P</i> for trend &lt;.001</li> </ul>                                                      | NA                  |
| Muller et al, <sup>68</sup> 2016 | 264<br>906 | WCRF/AICR score (diet only) | NA                           | <ul style="list-style-type: none"> <li>• Unhealthy, 1 [Reference]</li> <li>• Moderately unhealthy, HR: 0.88 (95% CI, 0.83-0.93)</li> <li>• Moderately healthy, HR: 0.81 (95% CI, 0.76-0.87)</li> <li>• Healthy, HR: 0.87 (95% CI, 0.72-0.83); <i>P</i> value NR</li> </ul>                                         | Race/ethnicity; SES |
| Mursu et al, <sup>69</sup> 2013  | 29<br>634  | AHEI 2010                   | NA                           | <ul style="list-style-type: none"> <li>• Q1, 1 [Reference]</li> <li>• Q2, HR: 0.98 (95% CI, 0.92-1.03)</li> <li>• Q3, HR: 0.90 (95% CI, 0.85-0.95)</li> <li>• Q4, HR: 0.82 (95% CI, 0.77-0.87); <i>P</i> for trend &lt;.001</li> <li>• Per-SD increase, HR: 0.92 (95% CI, 0.91-0.94); <i>P</i> value NR</li> </ul> | NA                  |

|                                       |       |                                  |    |                                                                                                                                                                                                                                                                                                                    |                                        |
|---------------------------------------|-------|----------------------------------|----|--------------------------------------------------------------------------------------------------------------------------------------------------------------------------------------------------------------------------------------------------------------------------------------------------------------------|----------------------------------------|
|                                       |       | A priori diet quality score      | NA | <ul style="list-style-type: none"> <li>• Q1, 1 [Reference]</li> <li>• Q2, HR: 0.93 (95% CI, 0.88-0.98)</li> <li>• Q3, HR: 0.87 (95% CI, 0.82-0.92)</li> <li>• Q4, HR: 0.80 (95% CI, 0.76-0.85); <i>P</i> for trend &lt;.001</li> <li>• Per-SD increase, HR: 0.92 (95% CI, 0.90-0.94); <i>P</i> value NR</li> </ul> | NA                                     |
| Nakamura et al, <sup>70</sup> 2009    | 9086  | Reduced-salt Japanese diet score | NA | <ul style="list-style-type: none"> <li>• Score 0-2, 1 [Reference]</li> <li>• Score 3, HR: 0.92 (95% CI, 0.83-1.04)</li> <li>• Score 4-7, HR: 0.78 (95% CI, 0.70-0.88); <i>P</i> for trend &lt;.001</li> </ul>                                                                                                      | SES; alcohol intake; physical activity |
| Neelakantan et al, <sup>71</sup> 2018 | 57078 | aMED                             | NA | <ul style="list-style-type: none"> <li>• Q1, 1 [Reference]</li> <li>• Q2, HR: 0.96 (95% CI, 0.92-1.01)</li> <li>• Q3, HR: 0.93 (95% CI, 0.89-0.98)</li> <li>• Q4, HR: 0.88 (95% CI, 0.83-0.92)</li> <li>• Q5, HR: 0.80 (95% CI, 0.76-0.85); <i>P</i> for trend &lt;.001</li> </ul>                                 | NA                                     |
|                                       |       | DASH score                       | NA | <ul style="list-style-type: none"> <li>• Q1, 1 [Reference]</li> <li>• Q2, HR: 0.91 (95% CI, 0.86-0.96)</li> <li>• Q3, HR: 0.87 (95% CI, 0.82-0.92)</li> <li>• Q4, HR: 0.85 (95% CI, 0.80-0.89)</li> </ul>                                                                                                          | NA                                     |

|                                   |           |                                        |                     |                                                                                                                                                                                                                                                                          |                |
|-----------------------------------|-----------|----------------------------------------|---------------------|--------------------------------------------------------------------------------------------------------------------------------------------------------------------------------------------------------------------------------------------------------------------------|----------------|
|                                   |           |                                        |                     | <ul style="list-style-type: none"> <li>Q5, HR: 0.80 (95% CI, 0.75-0.84); <i>P</i> for trend &lt;.001</li> </ul>                                                                                                                                                          |                |
|                                   |           | aHEI                                   | NA                  | <ul style="list-style-type: none"> <li>Q1, 1 [Reference]</li> <li>Q2, HR: 0.93 (95% CI, 0.88-0.98)</li> <li>Q3, HR: 0.89 (95% CI, 0.85-0.93)</li> <li>Q4, HR: 0.86 (95% CI, 0.82-0.90)</li> <li>Q5, HR: 0.82 (95% CI, 0.78-0.86); <i>P</i> for trend &lt;.001</li> </ul> | NA             |
| Nilsson et al, <sup>72</sup> 2012 | 77<br>319 | Sami diet score                        | Female participants | <ul style="list-style-type: none"> <li>HR: 1.03 (95% CI, 0.99-1.07); <i>P</i> = .13</li> </ul>                                                                                                                                                                           | Race/ethnicity |
|                                   |           |                                        | Male participants   | <ul style="list-style-type: none"> <li>HR: 1.04 (95% CI, 1.01-1.07); <i>P</i> = .02</li> </ul>                                                                                                                                                                           | NA             |
| Oba et al, <sup>73</sup> 2009     | 29<br>079 | Japanese Food Guide Spinning Top score | Female participants | <ul style="list-style-type: none"> <li>Q1, 1 [Reference]</li> <li>Q2, HR: 0.87 (95% CI, 0.73-1.05)</li> <li>Q3, HR: 0.86 (95% CI, 0.72-1.04)</li> <li>Q4, HR: 0.78 (95% CI, 0.65-0.94); <i>P</i> for trend = .01</li> </ul>                                              | NA             |
|                                   |           |                                        | Male participants   | <ul style="list-style-type: none"> <li>Q1, 1 [Reference]</li> <li>Q2, HR: 0.90 (95% CI, 0.76-1.06)</li> <li>Q3, HR: 0.87 (95% CI, 0.73-1.02)</li> <li>Q4, HR: 1.01 (95% CI, 0.86-1.19); <i>P</i> for trend = .91</li> </ul>                                              | NA             |

|                                 |           |                  |                     |                                                                                                                                                                                                                                                                                                       |                |
|---------------------------------|-----------|------------------|---------------------|-------------------------------------------------------------------------------------------------------------------------------------------------------------------------------------------------------------------------------------------------------------------------------------------------------|----------------|
| Okada et al, <sup>74</sup> 2018 | 58<br>767 | Japan food score | Female participants | <ul style="list-style-type: none"> <li>Score 0-2, 1 [Reference]</li> <li>Score 3, HR: 0.92 (95% CI, 0.82-1.03)</li> <li>Score 4, HR: 0.99 (95% CI, 0.89-1.09)</li> <li>Score 5, HR: 0.85 (95% CI, 0.77-0.94)</li> <li>Score 6-7, HR: 0.82 (95% CI, 0.75-0.90); <i>P</i> for trend &lt;.001</li> </ul> | NA             |
|                                 |           |                  | Male participants   | <ul style="list-style-type: none"> <li>Score 0-2, 1 [Reference]</li> <li>Score 3, HR: 0.96 (95% CI, 0.88-1.04)</li> <li>Score 4, HR: 0.92 (95% CI, 0.84-1.00)</li> <li>Score 5, HR: 0.95 (95% CI, 0.88-1.03)</li> <li>Score 6-7, HR: 0.93 (95% CI, 0.86-1.01); <i>P</i> for trend = .07</li> </ul>    | NA             |
| Olsen et al, <sup>75</sup> 2011 | 50<br>290 | HNFI             | Female participants | <ul style="list-style-type: none"> <li>per 1-point, RR: 0.96 (95% CI, 0.92-1.00); <i>P</i> for trend = .03</li> <li>0, 1 [Reference]</li> <li>1, RR: 0.96 (95% CI, 0.75-1.23)</li> <li>2, RR: 0.87 (95% CI, 0.68-1.10)</li> <li>3, RR: 0.81 (95% CI, 0.63-1.04)</li> </ul>                            | Race/ethnicity |

|                                 |      |                                 |                     |                                                                                                                                                                                                                                                                                                                                                                                                                         |                     |
|---------------------------------|------|---------------------------------|---------------------|-------------------------------------------------------------------------------------------------------------------------------------------------------------------------------------------------------------------------------------------------------------------------------------------------------------------------------------------------------------------------------------------------------------------------|---------------------|
|                                 |      |                                 |                     | <ul style="list-style-type: none"> <li>• 4, RR: 0.81 (95% CI, 0.62-1.05)</li> <li>• 5, RR: 0.84 (95% CI, 0.63-1.12)</li> <li>• 6, RR: 0.75 (95% CI, 0.49-1.15)</li> </ul>                                                                                                                                                                                                                                               |                     |
|                                 |      |                                 | Male participants   | <ul style="list-style-type: none"> <li>• per 1-point, RR: 0.96 (95% CI, 0.92- 0.99); <i>P</i> for trend = .005</li> <li>• 0, 1 [Reference]</li> <li>• 1, RR: 0.76 (95% CI, 0.61-0.94)</li> <li>• 2, RR: 0.69 (95% CI, 0.55-0.85)</li> <li>• 3, RR: 0.68 (95% CI, 0.55-0.85)</li> <li>• 4, RR: 0.64 (95% CI, 0.51-0.81)</li> <li>• 5, RR: 0.67 (95% CI, 0.52-0.85)</li> <li>• 6, RR: 0.64 (95% CI, 0.46-0.89)</li> </ul> | NA                  |
| Osler et al, <sup>76</sup> 2001 | 5872 | Healthy food index <sup>c</sup> | Female participants | <ul style="list-style-type: none"> <li>• per SD, HR: 0.96 (95% CI, 0.85-1.09)</li> <li>• 0 point, 1 [Reference]</li> <li>• 1 point, HR: 0.80 (95% CI, 0.53-1.20)</li> <li>• 2 points, HR: 0.71 (95% CI, 0.46-1.07)</li> <li>• 3 + 4 points, HR: 0.82 (95% CI, 0.54-1.25)</li> </ul>                                                                                                                                     | Age; race/ethnicity |
|                                 |      |                                 | Male participants   | <ul style="list-style-type: none"> <li>• per SD, HR: 0.86 (95% CI, 0.86-1.05)</li> </ul>                                                                                                                                                                                                                                                                                                                                | NA                  |



|  |  |                      |                     |                                                                                                                                                                                                                                                           |    |
|--|--|----------------------|---------------------|-----------------------------------------------------------------------------------------------------------------------------------------------------------------------------------------------------------------------------------------------------------|----|
|  |  |                      |                     | <ul style="list-style-type: none"> <li>• 0 point, 1 [Reference]</li> <li>• 1 point, HR: 0.73 (95% CI, 0.56-0.98)</li> <li>• 2 points, HR: 0.78 (95% CI, 0.59-1.02)</li> <li>• 3 + 4 points, HR: 0.82 (95% CI, 0.58-1.14)</li> </ul>                       |    |
|  |  | Prudent <sup>c</sup> | Female participants | <ul style="list-style-type: none"> <li>• per SD, HR: 0.74 (95% CI, 0.64-0.85)</li> <li>• Q1, 1 [Reference]</li> <li>• Q2, HR: 0.69 (95% CI, 0.50-0.96)</li> <li>• Q3, HR: 0.57 (95% CI, 0.40-0.82)</li> <li>• Q4, HR: 0.46 (95% CI, 0.30-0.72)</li> </ul> | NA |
|  |  |                      | Male participants   | <ul style="list-style-type: none"> <li>• per SD, HR: 0.84 (95% CI, 0.75-0.93)</li> <li>• Q1, 1 [Reference]</li> <li>• Q2, HR: 0.87 (95% CI, 0.68-1.11)</li> <li>• Q3, HR: 0.71 (95% CI, 0.53-0.96)</li> <li>• Q4, HR: 0.70 (95% CI, 0.49-1.00)</li> </ul> | NA |
|  |  | Western <sup>c</sup> | Female participants | <ul style="list-style-type: none"> <li>• per SD, HR: 0.91 (95% CI, 0.80-1.03)</li> <li>• Q1, 1 [Reference]</li> <li>• Q2, HR: 0.93 (95% CI, 0.67-1.29)</li> </ul>                                                                                         | NA |

|                                              |            |              |                               |                                                                                                                                                                                                                                                                                |    |
|----------------------------------------------|------------|--------------|-------------------------------|--------------------------------------------------------------------------------------------------------------------------------------------------------------------------------------------------------------------------------------------------------------------------------|----|
|                                              |            |              |                               | <ul style="list-style-type: none"> <li>• Q3, HR: 0.65 (95% CI, 0.44-0.94)</li> <li>• Q4, HR: 0.87 (95% CI, 0.59-1.29)</li> </ul>                                                                                                                                               |    |
|                                              |            |              | Male participants             | <ul style="list-style-type: none"> <li>• per SD, HR: 1.01 (95% CI, 0.90-1.12)</li> <li>• Q1, 1 [Reference]</li> <li>• Q2, HR: 0.81 (95% CI, 0.60-1.09)</li> <li>• Q3, HR: 0.97 (95% CI, 0.73-1.29)</li> <li>• Q4, HR: 0.92 (95% CI, 0.69-1.23)</li> </ul>                      | NA |
| Panizza et al, <sup>77</sup> 2018            | 156<br>804 | HEI 2015     | Female participants           | <ul style="list-style-type: none"> <li>• Q1, 1 [Reference]</li> <li>• Q2, HR: 0.92 (95% CI, 0.89-0.96)</li> <li>• Q3, HR: 0.87 (95% CI, 0.84-0.91)</li> <li>• Q4, HR: 0.82 (95% CI, 0.79-0.86)</li> <li>• Q5, HR: 0.79 (95% CI, 0.76-0.82); <math>P &lt; .05</math></li> </ul> | NA |
|                                              |            |              | Male participants             | <ul style="list-style-type: none"> <li>• Q1, 1 [Reference]</li> <li>• Q2, HR: 0.93 (95% CI, 0.90-0.97)</li> <li>• Q3, HR: 0.89 (95% CI, 0.85-0.92)</li> <li>• Q4, HR: 0.85 (95% CI, 0.81-0.88)</li> <li>• Q5, HR: 0.79 (95% CI, 0.76-0.82); <math>P &lt; .05</math></li> </ul> | NA |
| Park, Steck, Fung, et al, <sup>78</sup> 2016 | 1739       | MedDietScore | Metabolically healthy obesity | <ul style="list-style-type: none"> <li>• T1, 1 [Reference]</li> </ul>                                                                                                                                                                                                          | NA |

|                                              |      |     |                                               |                                                                                                                                                                                                                                                           |    |
|----------------------------------------------|------|-----|-----------------------------------------------|-----------------------------------------------------------------------------------------------------------------------------------------------------------------------------------------------------------------------------------------------------------|----|
|                                              |      |     |                                               | <ul style="list-style-type: none"> <li>• T2, HR: 0.35 (95% CI, 0.19-0.64)</li> <li>• T3, HR: 0.44 (95% CI, 0.26-0.75);<br/><i>P</i> for trend &lt;.001</li> <li>• per 5-pt increase, HR: 0.59 (95% CI, 0.37-0.94)</li> </ul>                              |    |
|                                              |      |     | Metabolically unhealthy obesity               | <ul style="list-style-type: none"> <li>• T1, 1 [Reference]</li> <li>• T2, HR: 0.74 (95% CI, 0.58-0.95)</li> <li>• T3, HR: 0.92 (95% CI, 0.48-1.76);<br/><i>P</i> for trend = .66</li> <li>• per 5-pt increase, HR: 0.96 (95% CI, 0.78-1.17)</li> </ul>    | NA |
| Park, Fung, Steck, et al, <sup>79</sup> 2016 | 2103 | HEI | Metabolically healthy normal weight phenotype | <ul style="list-style-type: none"> <li>• T1, 1 [Reference]</li> <li>• T2, HR: 0.64 (95% CI, 0.39-1.05)</li> <li>• T3, HR: 0.68 (95% CI, 0.44-1.05);<br/><i>P</i> for trend = .09</li> <li>• per unit increase, HR: 0.83 (95% CI, 0.70-1.00)</li> </ul>    | NA |
|                                              |      |     | Metabolically obese normal weight phenotype   | <ul style="list-style-type: none"> <li>• T1, 1 [Reference]</li> <li>• T2, HR: 0.59 (95% CI, 0.44-0.79)</li> <li>• T3, HR: 0.54 (95% CI, 0.39-0.75);<br/><i>P</i> for trend &lt;.001</li> <li>• Per-unit increase, HR: 0.78 (95% CI, 0.68-0.90)</li> </ul> | NA |

|                                    |            |              |                     |                                                                                                                                                                                                                                                                                   |                |
|------------------------------------|------------|--------------|---------------------|-----------------------------------------------------------------------------------------------------------------------------------------------------------------------------------------------------------------------------------------------------------------------------------|----------------|
| Prinelli et al, <sup>80</sup> 2015 | 974        | MedDietScore |                     | <ul style="list-style-type: none"> <li>• Low, 1 [Reference]</li> <li>• Medium, HR: 0.79 (95% CI, 0.43-1.12)</li> <li>• High, HR: 0.62 (95% CI, 0.43-0.89); <i>P</i> for trend = .01</li> <li>• Per-unit increase, HR: 0.95 (95% CI, 0.92-0.98)</li> </ul>                         | Race/ethnicity |
|                                    |            | MDS          |                     | <ul style="list-style-type: none"> <li>• Tertiles, [Reference] NR, HR: 0.69 (95% CI, 0.46-1.03); <i>P</i> for trend = .07</li> </ul>                                                                                                                                              | NA             |
| Reedy et al, <sup>81</sup> 2014    | 424<br>662 | AHEI 2010    | Female participants | <ul style="list-style-type: none"> <li>• Q1, 1 [Reference]</li> <li>• Q2, HR: 0.91 (95% CI, 0.88-0.94)</li> <li>• Q3, HR: 0.85 (95% CI, 0.83-0.88)</li> <li>• Q4, HR: 0.85 (95% CI, 0.82-0.88)</li> <li>• Q5, HR: 0.76 (95% CI, 0.74-0.79); <i>P</i> for trend &lt;.05</li> </ul> | NA             |
|                                    |            |              | Male participants   | <ul style="list-style-type: none"> <li>• Q1, 1 [Reference]</li> <li>• Q2, HR: 0.91 (95% CI, 0.89-0.93)</li> <li>• Q3, HR: 0.88 (95% CI, 0.86-0.91)</li> <li>• Q4, HR: 0.83 (95% CI, 0.81-0.86)</li> <li>• Q5, HR: 0.76 (95% CI, 0.76-0.80); <i>P</i> for trend &lt;.05</li> </ul> | NA             |

|  |  |            |                     |                                                                                                                                                                                                                                                                                       |    |
|--|--|------------|---------------------|---------------------------------------------------------------------------------------------------------------------------------------------------------------------------------------------------------------------------------------------------------------------------------------|----|
|  |  | aMED       | Female participants | <ul style="list-style-type: none"> <li>• Q1, 1 [Reference]</li> <li>• Q2, HR: 0.94 (95% CI, 0.90-0.97)</li> <li>• Q3, HR: 0.89 (95% CI, 0.86-0.92)</li> <li>• Q4, HR: 0.83 (95% CI, 0.80-0.86)</li> <li>• Q5, HR: 0.76 (95% CI, 0.73-0.79);<br/><i>P</i> for trend &lt;.05</li> </ul> | NA |
|  |  |            | Male participants   | <ul style="list-style-type: none"> <li>• Q1, 1 [Reference]</li> <li>• Q2, HR: 0.92 (95% CI, 0.90-0.94)</li> <li>• Q3, HR: 0.88 (95% CI, 0.85-0.90)</li> <li>• Q4, HR: 0.83 (95% CI, 0.81-0.85)</li> <li>• Q5, HR: 0.77 (95% CI, 0.75-0.79);<br/><i>P</i> for trend &lt;.05</li> </ul> | NA |
|  |  | DASH score | Female participants | <ul style="list-style-type: none"> <li>• Q1, 1 [Reference]</li> <li>• Q2, HR: 0.93 (95% CI, 0.90-0.96)</li> <li>• Q3, HR: 0.87 (95% CI, 0.84-0.89)</li> <li>• Q4, HR: 0.82 (95% CI, 0.79-0.85)</li> <li>• Q5, HR: 0.78 (95% CI, 0.75-0.81);<br/><i>P</i> for trend &lt;.05</li> </ul> | NA |
|  |  |            | Male participants   | <ul style="list-style-type: none"> <li>• Q1, 1 [Reference]</li> <li>• Q2, HR: 0.95 (95% CI, 0.92-0.97)</li> <li>• Q3, HR: 0.90 (95% CI, 0.88-0.93)</li> </ul>                                                                                                                         | NA |

|                                   |           |          |                     |                                                                                                                                                                                                                                                                                       |                |
|-----------------------------------|-----------|----------|---------------------|---------------------------------------------------------------------------------------------------------------------------------------------------------------------------------------------------------------------------------------------------------------------------------------|----------------|
|                                   |           |          |                     | <ul style="list-style-type: none"> <li>• Q4, HR: 0.87 (95% CI, 0.85-0.90)</li> <li>• Q5, HR: 0.83 (95% CI, 0.80-0.85);<br/><i>P</i> for trend &lt;.05</li> </ul>                                                                                                                      |                |
|                                   |           | HEI 2010 | Female participants | <ul style="list-style-type: none"> <li>• Q1, 1 [Reference]</li> <li>• Q2, HR: 0.88 (95% CI, 0.85-0.91)</li> <li>• Q3, HR: 0.88 (95% CI, 0.85-0.91)</li> <li>• Q4, HR: 0.82 (95% CI, 0.79-0.85)</li> <li>• Q5, HR: 0.77 (95% CI, 0.74-0.80);<br/><i>P</i> for trend &lt;.05</li> </ul> | NA             |
|                                   |           |          | Male participants   | <ul style="list-style-type: none"> <li>• Q1, 1 [Reference]</li> <li>• Q2, HR: 0.91 (95% CI, 0.88-0.93)</li> <li>• Q3, HR: 0.86 (95% CI, 0.83-0.88)</li> <li>• Q4, HR: 0.83 (95% CI, 0.81-0.85)</li> <li>• Q5, HR: 0.78 (95% CI, 0.76-0.80);<br/><i>P</i> for trend &lt;.05</li> </ul> | NA             |
| Roswall et al, <sup>82</sup> 2015 | 44<br>961 | HNFI     | NA                  | <ul style="list-style-type: none"> <li>• Per-unit increase and MRR, MRR: 0.94 (95% CI, 0.91-0.97); <i>P</i> &lt; .001</li> <li>• low 0-1, 1 [Reference]</li> <li>• middle 2-3, MRR: 0.88 (95% CI, 0.79-0.99)</li> <li>• high 4-6, MRR: 0.82 (95% CI, 0.71-0.93)</li> </ul>            | Race/ethnicity |

|                                   |            |            |                     |                                                                                                                                                                                                                                                                                                         |                                     |
|-----------------------------------|------------|------------|---------------------|---------------------------------------------------------------------------------------------------------------------------------------------------------------------------------------------------------------------------------------------------------------------------------------------------------|-------------------------------------|
| Seymour et al, <sup>83</sup> 2003 | 115<br>833 | DQI        | Female participants | <ul style="list-style-type: none"> <li>• High, 1 [Reference]</li> <li>• Medium-high, RR: 1.09 (95% CI, 0.87-1.38)</li> <li>• Medium, RR: 1.15 (95% CI, 0.91-1.45)</li> <li>• Medium-low, RR: 1.31 (95% CI, 1.04-1.65)</li> <li>• Low, RR: 1.23 (95% CI, 0.84-1.81); <i>P</i> for trend = .02</li> </ul> | Anthropometry                       |
|                                   |            |            | Male participants   | <ul style="list-style-type: none"> <li>• High, 1 [Reference]</li> <li>• Medium-high, RR: 1.06 (95% CI, 0.85-1.31)</li> <li>• Medium, RR: 1.08 (95% CI, 0.88-1.33)</li> <li>• Medium-low, RR: 1.17 (95% CI, 0.96-1.44)</li> <li>• Low, RR: 1.19 (95% CI, 0.94-1.49); <i>P</i> for trend = .04</li> </ul> | NA                                  |
| Shah et al, <sup>84</sup> 2018    | 11<br>376  | MDS        | NA                  | <ul style="list-style-type: none"> <li>• MDS, HR: 0.99 (95% CI, 0.94-1.04)</li> </ul>                                                                                                                                                                                                                   | Race/ethnicity; SES; alcohol intake |
|                                   |            | DASH score | NA                  | <ul style="list-style-type: none"> <li>• DASH score, HR: 0.94 (95% CI, 0.89-0.99)</li> </ul>                                                                                                                                                                                                            | NA                                  |
| Shahar et al, <sup>85</sup> 2009  | 285        | HEI        | NA                  | <ul style="list-style-type: none"> <li>• HEI: &lt;51, Poor, 1 [Reference]</li> </ul>                                                                                                                                                                                                                    | Physical activity                   |

|                                    |            |           |                             |                                                                                                                                                                                                         |               |
|------------------------------------|------------|-----------|-----------------------------|---------------------------------------------------------------------------------------------------------------------------------------------------------------------------------------------------------|---------------|
|                                    |            |           |                             | <ul style="list-style-type: none"> <li>• HEI: 51-80, Fair, HR: 1.52 (95% CI, 0.7-3.5)</li> <li>• HEI: <math>\geq</math>80, Good, HR: 1.9 (95% CI, 0.7-5.2); <i>P</i> for trend = .26</li> </ul>         |               |
| Shivappa et al, <sup>86</sup> 2017 | 7627       | AHEI 2010 | NA                          | <ul style="list-style-type: none"> <li>• HR: 0.82 (95% CI, 0.76-0.88); <i>P</i> &lt; .001</li> </ul>                                                                                                    | NA            |
| Shvetsov et al, <sup>87</sup> 2016 | 193<br>527 | aMED      | NA                          | <ul style="list-style-type: none"> <li>• aMED (Q5 vs Q1), HR: 0.77 (95% CI, 0.74-0.80)</li> <li>• aMED-e (Q5 vs Q1), HR: 0.79 (95% CI, 0.76-0.82)</li> </ul>                                            | NA            |
| Sijtsma et al, <sup>88</sup> 2015  | 826        | DHNaFS    | Male participants, with CVD | <ul style="list-style-type: none"> <li>• T1, 1 [Reference]</li> <li>• T2, HR: 0.58 (95% CI, 0.39-0.86)</li> <li>• T3, HR: 0.67 (95% CI, 0.45-0.99); <i>P</i> for trend = .11</li> </ul>                 | Anthropometry |
|                                    |            |           | Male participants, non-CVD  | <ul style="list-style-type: none"> <li>• ACM:</li> <li>• T1, 1 [Reference]</li> <li>• T2, HR: 1.04 (95% CI, 0.84-1.29)</li> <li>• T3, HR: 0.97 (95% CI, 0.76-1.23); <i>P</i> for trend = .82</li> </ul> | NA            |
|                                    |            | DUNaFS    | Male participants, with CVD | <ul style="list-style-type: none"> <li>• T1, 1 [Reference]</li> <li>• T2, HR: 0.98 (95% CI, 0.67-1.42)</li> <li>• T3, HR: 0.79 (95% CI, 0.50-1.24); <i>P</i> for trend = .53</li> </ul>                 | NA            |



|                                        |           |            |                            |                                                                                                                                                                                                                                                                                    |                |
|----------------------------------------|-----------|------------|----------------------------|------------------------------------------------------------------------------------------------------------------------------------------------------------------------------------------------------------------------------------------------------------------------------------|----------------|
|                                        |           |            | Male participants, non-CVD | <ul style="list-style-type: none"> <li>• T1, 1 [Reference]</li> <li>• T2, HR: 0.81 (95% CI, 0.65-1.00)</li> <li>• T3, HR: 0.86 (95% CI, 0.67-1.10); <i>P</i> for trend = .16</li> </ul>                                                                                            | NA             |
| Sjögren et al, <sup>89</sup> 2010      | 924       | mMDS       | NA                         | <ul style="list-style-type: none"> <li>• Per-SD increase, HR: 0.83 (95% CI, 0.70-0.99)</li> <li>• Low 0-2, 1 [Reference]</li> <li>• Medium 3-5, HR: 0.73 (95% CI, 0.52-1.00)</li> <li>• High 6-8, HR: 0.56 (95% CI, 0.33-0.96); <i>P</i> for trend = .02</li> </ul>                | Race/ethnicity |
| Sotos-Prieto et al, <sup>90</sup> 2017 | 73<br>739 | aMED       | NA                         | <ul style="list-style-type: none"> <li>• Q1, HR: 1.06 (95% CI, 0.99-1.13)</li> <li>• Q2, HR: 0.97 (95% CI, 0.91-1.04)</li> <li>• Q3, 1 [Reference]</li> <li>• Q4, HR: 0.93 (95% CI, 0.87-0.98)</li> <li>• Q5, HR: 0.84 (95% CI, 0.78-0.91); <i>P</i> for trend &lt;.001</li> </ul> | NA             |
|                                        |           | DASH score | NA                         | <ul style="list-style-type: none"> <li>• Q1, HR: 1.06 (95% CI, 1.00-1.12)</li> <li>• Q2, HR: 1.01 (95% CI, 0.94-1.07)</li> <li>• Q3, 1 [Reference]</li> <li>• Q4, HR: 0.93 (95% CI, 0.87-1.00)</li> </ul>                                                                          | NA             |

|                                   |           |      |    |                                                                                                                                                                                                                                                                                                                                                                                |                                  |
|-----------------------------------|-----------|------|----|--------------------------------------------------------------------------------------------------------------------------------------------------------------------------------------------------------------------------------------------------------------------------------------------------------------------------------------------------------------------------------|----------------------------------|
|                                   |           |      |    | <ul style="list-style-type: none"> <li>Q5, HR: 0.89 (95% CI, 0.84-0.95); <i>P</i> for trend &lt;.001</li> </ul>                                                                                                                                                                                                                                                                |                                  |
|                                   |           | aHEI | NA | <ul style="list-style-type: none"> <li>Q1, HR: 1.12 (95% CI, 1.05-1.19)</li> <li>Q2, HR: 1.06 (95% CI, 1.00-1.13)</li> <li>Q3, 1 [Reference]</li> <li>Q4, HR: 0.94 (95% CI, 0.88-1.01)</li> <li>Q5, HR: 0.91 (95% CI, 0.85-0.97); <i>P</i> for trend &lt;.001</li> </ul>                                                                                                       | NA                               |
| Stefler et al, <sup>91</sup> 2017 | 19<br>333 | mMDS | NA | <ul style="list-style-type: none"> <li>Per-SD increase HR: 0.93 (95% CI, 0.88-0.98); <i>P</i> for trend = .01</li> <li>Low 0-7, 1 [Reference]</li> <li>Moderate 8-10, HR: 0.85 (95% CI, 0.75-0.90)</li> <li>High 11-17, HR: 0.85 (95% CI, 0.73-1.00); <i>P</i> for trend = .03</li> <li>per 1000 person-years, Low 12.2, Moderate 9.0, High 7.3; <i>P</i> &lt; .001</li> </ul> | Race/ethnicity;<br>anthropometry |
|                                   |           | mMDS | NA | <ul style="list-style-type: none"> <li>Per-SD increase, HR: 0.95 (95% CI, 0.90, 1.01); <i>P</i> = .11</li> <li>Low 0-3, 1 [Reference]</li> <li>Moderate 4-5, HR: 0.90 (95% CI, 0.79-1.02)</li> <li>High 6-9, HR: 0.88 (95% CI, 0.76-1.03)</li> </ul>                                                                                                                           | NA                               |

|                                   |           |         |    |                                                                                                                                                                                                                                                                                                                                                |                |
|-----------------------------------|-----------|---------|----|------------------------------------------------------------------------------------------------------------------------------------------------------------------------------------------------------------------------------------------------------------------------------------------------------------------------------------------------|----------------|
| Struijk et al, <sup>92</sup> 2014 | 33<br>066 | mMDS    | NA | <ul style="list-style-type: none"> <li>• Per-SD increase, DALY: -0.13 (95% CI, -0.20 to -0.06)</li> <li>• 0-3, 1 [Reference]</li> <li>• 4-5, DALY: -0.16 (95% CI, -0.32 to -0.01)</li> <li>• 6-9, DALY: -0.34 (95% CI, -0.52 to -0.16); <i>P</i> for trend = .01</li> </ul>                                                                    | Race/ethnicity |
|                                   |           | DHD     | NA | <ul style="list-style-type: none"> <li>• Per-SD increase, DALY: -0.05 (95% CI, -0.11 to 0.01)</li> <li>• T1, [Reference]</li> <li>• T2, DALY: 0.07 (95% CI, -0.09 to 0.23)</li> <li>• T3, DALY: -0.08 (95% CI, -0.25 to -0.09); <i>P</i> for trend = .31</li> </ul>                                                                            | NA             |
|                                   |           | Prudent | NA | <ul style="list-style-type: none"> <li>• Prudent v. Western Ref, DALY: -0.16 (95% CI, -0.29 to -0.02)</li> <li>• Per-SD increase, DALY: -0.05 (95% CI, -0.14 to -0.04)</li> <li>• T1, 1 [Reference]</li> <li>• T2, DALY: -0.06 (95% CI, -0.22 to -0.09)</li> <li>• T3, DALY: -0.1 (95% CI, -0.34 to -0.1); <i>P</i> for trend = .23</li> </ul> | NA             |

|                                  |      |                       |    |                                                                                                                                                                                                                                                                                                                                                    |                                                                  |
|----------------------------------|------|-----------------------|----|----------------------------------------------------------------------------------------------------------------------------------------------------------------------------------------------------------------------------------------------------------------------------------------------------------------------------------------------------|------------------------------------------------------------------|
|                                  |      | Western               | NA | <ul style="list-style-type: none"> <li>• Prudent v. Western Ref, DALY: -0.16 (95% CI, -0.29 to -0.02)</li> <li>• Per-SD increase, DALY: -0.16 (95% CI, -0.24 to -0.08)</li> <li>• T1, 1 [Reference]</li> <li>• T2, DALY: -0.13 (95% CI, -0.30 to -0.01)</li> <li>• T3, DALY: -0.34 (95% CI, -0.52 to -0.16); <i>P</i> for trend &lt;.01</li> </ul> | NA                                                               |
| Thorpe et al, <sup>93</sup> 2013 | 2029 | HEI                   | NA | <ul style="list-style-type: none"> <li>• 25-44 y, HR: 0.49 (95% CI, 0.14-1.76)</li> <li>• 45-64 y, HR: 1.40 (95% CI, 0.44-4.45)</li> <li>• &gt;65 y, HR: 1.22 (95% CI, 0.48-3.14)</li> </ul>                                                                                                                                                       | Alcohol intake; physical activity; anthropometry; smoking status |
| Tognon et al, <sup>94</sup> 2011 | 1037 | Refined MDS           | NA | <ul style="list-style-type: none"> <li>• Continuous, HR: 0.93 (95% CI, 0.89-0.98)</li> <li>• Categorical, highest 4 levels vs others, HR: 0.82 (95% CI, 0.67-0.99)</li> </ul>                                                                                                                                                                      | Race/ethnicity                                                   |
|                                  |      | aMED, mMDS/HALE, mMDS | NA | <ul style="list-style-type: none"> <li>• Continuous, HR: 0.97 (95% CI, 0.92-1.02)</li> <li>• Categorical, highest 4 levels vs others, HR: 0.94 (95% CI, 0.79-1.11)</li> </ul>                                                                                                                                                                      | NA                                                               |

|                                  |           |      |                              |                                                                                                                                                                                               |                |
|----------------------------------|-----------|------|------------------------------|-----------------------------------------------------------------------------------------------------------------------------------------------------------------------------------------------|----------------|
| Tognon et al, <sup>95</sup> 2012 | 77<br>151 | MDS  | Female participants          | <ul style="list-style-type: none"> <li>• Per-unit, HR: 0.96 (95% CI, 0.92-1.00)</li> <li>• BMI&lt;30, HR: 0.95 (95% CI, 0.91-0.99)</li> <li>• BMI≥30, HR: 0.95 (95% CI, 0.87-1.05)</li> </ul> | Race/ethnicity |
|                                  |           |      | Male participants            | <ul style="list-style-type: none"> <li>• Per-unit, HR: 0.96 (95% CI, 0.93-0.99)</li> <li>• BMI&lt;30, HR: 0.95 (95% CI, 0.91-0.98)</li> <li>• BMI≥30, HR: 1.03 (95% CI, 0.95-1.12)</li> </ul> | NA             |
|                                  |           |      | Female and male participants | <ul style="list-style-type: none"> <li>• Per-unit, HR: 0.96 (95% CI, 0.93-0.98)</li> <li>• BMI&lt;30, HR: 0.95 (95% CI, 0.92-0.97)</li> <li>• BMI≥30, HR: 0.99 (95% CI, 0.93-1.06)</li> </ul> | NA             |
| Tognon et al, <sup>96</sup> 2014 | 1849      | mMDS | NA                           | <ul style="list-style-type: none"> <li>• Score 1, HR: 0.95 (95% CI, 0.91-1.00)</li> <li>• Score 2, HR: 0.94 (95% CI, 0.88-0.99)</li> <li>• Score 3, HR: 0.93 (95% CI, 0.87-0.98)</li> </ul>   | Race/ethnicity |

|                                        |           |                      |    |                                                                                                                                                                                                                                                                                                                                                                                                                                                                                    |                |
|----------------------------------------|-----------|----------------------|----|------------------------------------------------------------------------------------------------------------------------------------------------------------------------------------------------------------------------------------------------------------------------------------------------------------------------------------------------------------------------------------------------------------------------------------------------------------------------------------|----------------|
| Tong et al, <sup>97</sup> 2016         | 23<br>902 | Literature-based MDS | NA | <ul style="list-style-type: none"> <li>HR: 0.97 (95% CI, 0.94-0.99)</li> </ul>                                                                                                                                                                                                                                                                                                                                                                                                     | Race/ethnicity |
|                                        |           | mMDS                 | NA | <ul style="list-style-type: none"> <li>HR: 0.96 (95% CI, 0.93-0.98)</li> </ul>                                                                                                                                                                                                                                                                                                                                                                                                     | NA             |
|                                        |           | PyrMDS               | NA | <ul style="list-style-type: none"> <li>HR: 0.93 (95% CI, 0.93-0.98)</li> <li>Top 5% PyrMDS, n = 23 902, ACM incidence, 138.4/10 000 person-years, 7.5% cases preventable, PAF: 5.4% (95% CI, 1.3-9.5)</li> <li>Top 5% PyrMDS at high risk, n = 15 767, incidence, 191.3/10000 person-years, 10.9% cases preventable, PAF: 5.7% (95% CI, 1.6-9.8)</li> <li>Top 30% PyrMDS, ACM incidence, 138.4/10 000 person-years, 5.2% cases preventable, PAF: 3.8% (95% CI, 0.8-6.8)</li> </ul> | NA             |
|                                        |           | Tertiles of the MDS  | NA | <ul style="list-style-type: none"> <li>HR: 0.97 (95% CI, 0.94-0.99)</li> </ul>                                                                                                                                                                                                                                                                                                                                                                                                     | NA             |
| Trichopoulou et al, <sup>98</sup> 2003 | 22<br>043 | MDS                  | NA | <ul style="list-style-type: none"> <li>Per 2-pt increase, HR: 0.75 (95% CI, 0.64-0.87); P &lt; .001</li> </ul>                                                                                                                                                                                                                                                                                                                                                                     | Race/ethnicity |
| Trichopoulou et al, <sup>99</sup> 2005 | 74<br>607 | mMDS                 | NA | <ul style="list-style-type: none"> <li>Per 2-pt increase, HR: 0.93 (95% CI, 0.88-0.99); P = .09</li> <li>Low 0-3, 1 [Reference]</li> </ul>                                                                                                                                                                                                                                                                                                                                         | Race/ethnicity |

|                                         |            |           |                     |                                                                                                                                                                                                                                                                                                                                          |                        |
|-----------------------------------------|------------|-----------|---------------------|------------------------------------------------------------------------------------------------------------------------------------------------------------------------------------------------------------------------------------------------------------------------------------------------------------------------------------------|------------------------|
|                                         |            |           |                     | <ul style="list-style-type: none"> <li>Middle 4-5, HR: 0.93 (95% CI, 0.87-1.01); <i>P</i> for heterogeneity = .74</li> <li>Highest 6-9, HR: 0.91 (95% CI, 0.82-1.02); <i>P</i> for heterogeneity = .38</li> </ul>                                                                                                                        |                        |
| Trichopoulou et al, <sup>100</sup> 2009 | 23<br>349  | MDS       | NA                  | <ul style="list-style-type: none"> <li>Per 2-pt increase, HR: 0.86 (95% CI, 0.80-0.93); <i>P</i> &lt; .001</li> </ul>                                                                                                                                                                                                                    | Race/ethnicity         |
| van Dam et al, <sup>101</sup> 2008      | 77<br>782  | AHEI 2010 | NA                  | <ul style="list-style-type: none"> <li>Q1, 1 [Reference]</li> <li>Q2, RR: 0.85 (95% CI, 0.79-0.90)</li> <li>Q3, RR: 0.80 (95% CI, 0.75-0.85)</li> <li>Q4, RR: 0.76 (95% CI, 0.71-0.81)</li> <li>Q5, RR: 0.65 (95% CI, 0.61-0.70)</li> <li>Q1, Q2, Q3 vs Q4 or Q5, RR: 1.25 (95% CI, 1.19-1.30); PAR: 12.9% (95% CI, 9.6-16.2)</li> </ul> | Race/ethnicity;<br>SES |
| van den Brandt, <sup>102</sup> 2011     | 120<br>852 | aMED      | Female participants | <ul style="list-style-type: none"> <li>Per 2-point increase, HR: 0.84 (0.79-0.91); <i>P</i> &lt; .001</li> <li>0-3, 1 [Reference]</li> <li>4-5, HR: 0.80 (95% CI, 0.69-0.93)</li> <li>6-9, HR: 0.69 (95% CI, 0.58-0.82)</li> </ul>                                                                                                       | Race/ethnicity         |
|                                         |            |           | Male participants   | <ul style="list-style-type: none"> <li>Per 2-point increase, HR: 0.94 (95% CI, 0.87-1.02); <i>P</i> = .13</li> </ul>                                                                                                                                                                                                                     | NA                     |

|                                     |           |                                |                     |                                                                                                                                                                                                                                                                                                                                            |                                      |
|-------------------------------------|-----------|--------------------------------|---------------------|--------------------------------------------------------------------------------------------------------------------------------------------------------------------------------------------------------------------------------------------------------------------------------------------------------------------------------------------|--------------------------------------|
|                                     |           |                                |                     | <ul style="list-style-type: none"> <li>• 0-3, 1 [Reference]</li> <li>• 4-5, HR: 0.90 (95% CI, 0.77-1.06)</li> <li>• 6-9, HR: 0.89 (95% CI, 0.74-1.07)</li> </ul>                                                                                                                                                                           |                                      |
| van Lee et al, <sup>103</sup> 2016  | 3593      | DHD-I                          | NA                  | <ul style="list-style-type: none"> <li>• Per 10-point increment, HR: 0.94 (95% CI, 0.90-0.98)</li> <li>• Q1, 1 [Reference]</li> <li>• Q2, HR: 0.94 (95% CI, 0.82-1.06)</li> <li>• Q3, HR: 0.93 (95% CI, 0.82-1.06)</li> <li>• Q4, HR: 0.81 (95% CI, 0.71-0.93);<br/><i>P</i> for trend = .006</li> </ul>                                   | Race/ethnicity;<br>anthropometry     |
| Voortman et al, <sup>104</sup> 2017 | 9701      | Dutch dietary guidelines score | NA                  | <ul style="list-style-type: none"> <li>• Continuous, HR: 0.97 (95% CI, 0.95-0.98)</li> <li>• Q1, 1 [Reference]</li> <li>• Q2, HR: 0.95 (95% CI, 0.86-1.04)</li> <li>• Q3, HR: 0.93 (95% CI, 0.85-1.02)</li> <li>• Q4, HR: 0.88 (95% CI, 0.80-0.97)</li> <li>• Q5, HR: 0.86 (95% CI, 0.78-0.95);<br/><i>P</i> for trend &lt;.001</li> </ul> | Race/ethnicity                       |
| Vormund et al, <sup>105</sup> 2015  | 17<br>861 | Classic MDS                    | Female participants | <ul style="list-style-type: none"> <li>• HR: 1.00 (95% CI, 0.97-1.04)</li> </ul>                                                                                                                                                                                                                                                           | Race/ethnicity;<br>physical activity |
|                                     |           |                                | Male participants   | <ul style="list-style-type: none"> <li>• HR: 0.96 (95% CI, 0.93-0.98)</li> </ul>                                                                                                                                                                                                                                                           | NA                                   |



|                                             |           |                              |                              |                                                                                                                                                                             |                                                                                                                                |
|---------------------------------------------|-----------|------------------------------|------------------------------|-----------------------------------------------------------------------------------------------------------------------------------------------------------------------------|--------------------------------------------------------------------------------------------------------------------------------|
|                                             |           |                              | Female and male participants | <ul style="list-style-type: none"> <li>HR: 0.97 (95% CI, 0.95-1.00)</li> </ul>                                                                                              | NA                                                                                                                             |
|                                             |           | aMED, mMDS                   | Female participants          | <ul style="list-style-type: none"> <li>HR: 0.96 (95% CI, 0.94-0.98)</li> </ul>                                                                                              | NA                                                                                                                             |
|                                             |           |                              | Male participants            | <ul style="list-style-type: none"> <li>HR: 0.98 (95% CI, 0.95-1.02)</li> </ul>                                                                                              | NA                                                                                                                             |
|                                             |           |                              | Female and male participants | <ul style="list-style-type: none"> <li>HR: 0.94 (95% CI, 0.92-0.97)</li> </ul>                                                                                              | NA                                                                                                                             |
|                                             |           |                              | mMDS                         | Female participants                                                                                                                                                         | <ul style="list-style-type: none"> <li>4-6, HR: 0.90 (95% CI, 0.80-1.02)</li> <li>6-9, HR: 0.92 (95% CI, 0.80-1.05)</li> </ul> |
|                                             |           | Male participants            |                              | <ul style="list-style-type: none"> <li>4-6, HR: 0.83 (95% CI, 0.74-0.92)</li> <li>6-9, HR: 0.83 (95% CI, 0.73-0.94)</li> </ul>                                              | NA                                                                                                                             |
|                                             |           | Female and male participants |                              | <ul style="list-style-type: none"> <li>4-6, HR: 0.86 (95% CI, 0.79-0.93)</li> <li>6-9, HR: 0.86 (95% CI, 0.78-0.94)</li> </ul>                                              | NA                                                                                                                             |
| Wahlqvist et al, <sup>106</sup> 2005        | 636       | MDS                          | NA                           | <ul style="list-style-type: none"> <li>Reduced death risk of 13% (1%-24%); HR: 0.87 (95% CI, 0.76-0.99)</li> </ul>                                                          | Physical activity; anthropometry; smoking status                                                                               |
| Warensjö Lemming et al, <sup>107</sup> 2018 | 38<br>428 | aMED                         | NA                           | <ul style="list-style-type: none"> <li>Per-unit increase, HR: 0.94 (95% CI, 0.92-0.95)</li> <li>Low, 1 [Reference]</li> <li>Medium, HR: 0.87 (95% CI, 0.82-0.91)</li> </ul> | Age; race/ethnicity; alcohol intake                                                                                            |

|                                   |       |                        |    |                                                                                                                                                                                                                                                                                       |                |
|-----------------------------------|-------|------------------------|----|---------------------------------------------------------------------------------------------------------------------------------------------------------------------------------------------------------------------------------------------------------------------------------------|----------------|
|                                   |       |                        |    | <ul style="list-style-type: none"> <li>• High, HR: 0.76 (95% CI, 0.82-0.90)</li> <li>• Per-category, HR: 0.87 (95% CI, 0.8-0.90)</li> </ul>                                                                                                                                           |                |
|                                   |       | HNFI                   | NA | <ul style="list-style-type: none"> <li>• Per-unit increase, HR: 1.00 (95% CI, 0.99-1.02)</li> <li>• Low, 1 [Reference]</li> <li>• Medium, HR: 0.96 (95% CI, 0.91-1.00)</li> <li>• High, HR: 0.98 (95% CI, 0.91-1.06)</li> <li>• Per category, HR: 0.98 (95% CI, 0.95-1.02)</li> </ul> | NA             |
| Whalen et al, <sup>108</sup> 2017 | 21423 | MedDietScore           | NA | <ul style="list-style-type: none"> <li>• Q1, 1 [Reference]</li> <li>• Q2, HR: 0.90 (95% CI, 0.80-1.02)</li> <li>• Q3, HR: 0.82 (95% CI, 0.72-0.92)</li> <li>• Q4, HR: 0.79 (95% CI, 0.69-0.90)</li> <li>• Q5, HR: 0.64 (95% CI, 0.55-0.74)</li> </ul>                                 | Alcohol intake |
|                                   |       | Paleolithic diet score | NA | <ul style="list-style-type: none"> <li>• Q1, 1 [Reference]</li> <li>• Q2, HR: 0.95 (95% CI, 0.84-1.08)</li> <li>• Q3, HR: 0.94 (95% CI, 0.83-1.07)</li> <li>• Q4, HR: 0.87 (95% CI, 0.77-0.99)</li> <li>• Q5, HR: 0.77 (95% CI, 0.67-0.89)</li> </ul>                                 | NA             |

|                                      |           |                                             |    |                                                                                                                                                                                                                                                                                        |                |
|--------------------------------------|-----------|---------------------------------------------|----|----------------------------------------------------------------------------------------------------------------------------------------------------------------------------------------------------------------------------------------------------------------------------------------|----------------|
| Yu et al, <sup>109</sup> 2015        | 77<br>572 | HEI 2010                                    | NA | <ul style="list-style-type: none"> <li>• Q1, 1 [Reference]</li> <li>• Q2, HR: 0.99 (95% CI, 0.92-1.06)</li> <li>• Q3, HR: 0.95 (95% CI, 0.89-1.03)</li> <li>• Q4, HR: 0.93 (95% CI, 0.86-1.00)</li> <li>• Q5, HR: 0.80 (95% CI, 0.73-0.86);<br/><i>P</i> for trend &lt;.001</li> </ul> | NA             |
| Zaslavsky et al, <sup>110</sup> 2017 | 10<br>431 | DASH score                                  | NA | <ul style="list-style-type: none"> <li>• Q1, 1 [Reference]</li> <li>• Q2, HR: 0.97 (95% CI, 0.88-1.07)</li> <li>• Q3, HR: 0.95 (95% CI, 0.86-1.05)</li> <li>• Q4, HR: 0.88 (95% CI, 0.79-0.98);<br/><i>P</i> for trend = .02</li> </ul>                                                | Alcohol intake |
|                                      |           | aMED                                        | NA | <ul style="list-style-type: none"> <li>• Q1, 1 [Reference]</li> <li>• Q2, HR: 0.98 (95% CI, 0.89-1.08)</li> <li>• Q3, HR: 0.91 (95% CI, 0.81-1.03)</li> <li>• Q4, HR: 0.86 (95% CI, 0.76-0.97);<br/><i>P</i> for trend = .006</li> </ul>                                               | NA             |
| Zaslavsky et al, <sup>111</sup> 2018 | 10<br>431 | aMED                                        | NA | <ul style="list-style-type: none"> <li>• Per-unit increase, HR (95% CI):<br/>0.96 (0.943 to 0.985), <i>P</i> = .001</li> </ul>                                                                                                                                                         | NA             |
| Anderson et al, <sup>112</sup> 2011  | 2582      | Healthy foods <sup>e</sup>                  | NA | <ul style="list-style-type: none"> <li>• 1 [Reference]</li> </ul>                                                                                                                                                                                                                      | Anthropometry  |
|                                      |           | High-fat dairy products <sup>e</sup>        | NA | <ul style="list-style-type: none"> <li>• RR: 1.40 (95% CI, 1.04-1.88)</li> </ul>                                                                                                                                                                                                       | NA             |
|                                      |           | Meat, fried foods, and alcohol <sup>e</sup> | NA | <ul style="list-style-type: none"> <li>• RR: 1.21 (95% CI, 0.92-1.60)</li> </ul>                                                                                                                                                                                                       | NA             |

|                                   |      |                                  |    |                                                                                                                                                                                                                                                                                                                 |    |
|-----------------------------------|------|----------------------------------|----|-----------------------------------------------------------------------------------------------------------------------------------------------------------------------------------------------------------------------------------------------------------------------------------------------------------------|----|
|                                   |      | Breakfast cereal <sup>e</sup>    | NA | <ul style="list-style-type: none"> <li>RR: 1.16 (95% CI, 0.86-1.56)</li> </ul>                                                                                                                                                                                                                                  | NA |
|                                   |      | Refined grains <sup>e</sup>      | NA | <ul style="list-style-type: none"> <li>RR: 1.08 (95% CI, 0.80-1.45)</li> </ul>                                                                                                                                                                                                                                  | NA |
|                                   |      | Sweets and desserts <sup>e</sup> | NA | <ul style="list-style-type: none"> <li>RR: 1.37 (95% CI, 1.02-1.86)</li> </ul>                                                                                                                                                                                                                                  | NA |
| Atkins et al, <sup>113</sup> 2016 | 3226 | High-fat/low-fiber <sup>e</sup>  | NA | <ul style="list-style-type: none"> <li>Q1, 1 [Reference]</li> <li>Q2, HR: 1.1 (95% CI, 0.88-1.38)</li> <li>Q3, HR: 1.11 (95% CI, 0.88-1.39)</li> <li>Q4, HR: 1.44 (95% CI, 1.13-1.84);<br/><i>P</i> for trend = .007</li> <li>Rate/1000 person-years, Q1: 22.65; Q2: 24.62; Q3: 30.59; and Q4: 35.69</li> </ul> | NA |
|                                   |      | Prudent <sup>e</sup>             | NA | <ul style="list-style-type: none"> <li>Q1, 1 [Reference]</li> <li>Q2, HR: 0.77 (95% CI, 0.63-0.95)</li> <li>Q3, HR: 0.93 (95% CI, 0.75-1.14)</li> <li>Q4, HR: 0.83 (95% CI, 0.66-1.04);<br/><i>P</i> for trend = .28</li> <li>Rate/1000 person-years, Q1: 36.66; Q2: 26.64; Q3: 25.15; and Q4: 24.97</li> </ul> | NA |
|                                   |      | High sugar <sup>e</sup>          | NA | <ul style="list-style-type: none"> <li>Q1, 1 [Reference]</li> <li>Q2, HR: 1.06 (95% CI, 0.85-1.31)</li> <li>Q3, HR: 0.91 (95% CI, 0.72-1.15)</li> </ul>                                                                                                                                                         | NA |

|                                    |           |                                              |    |                                                                                                                                                                                                                                                                  |                |
|------------------------------------|-----------|----------------------------------------------|----|------------------------------------------------------------------------------------------------------------------------------------------------------------------------------------------------------------------------------------------------------------------|----------------|
|                                    |           |                                              |    | <ul style="list-style-type: none"> <li>• Q4, HR: 1.0 (95% CI, 0.77-1.29); <i>P</i> for trend = .71</li> <li>• Rate/1000 person-years, Q1: 27.32; Q2: 28; Q3: 26.56; and Q4: 31.18</li> </ul>                                                                     |                |
| Bamia et al, <sup>114</sup> 2007   | 74<br>607 | Plant-based <sup>e</sup>                     | NA | <ul style="list-style-type: none"> <li>• Per SD, HR (95% CI): 0.86, (0.77 to 0.95), <i>P</i> = .06</li> <li>• T1, [Ref]</li> <li>• T2, HR (95% CI): 0.90 (0.84 to 0.98); <i>P</i> = .502;</li> <li>• T3, HR: 0.89 (95% CI, 0.79-0.99); <i>P</i> = .12</li> </ul> | Race/ethnicity |
| Brunner et al, <sup>115</sup> 2008 | 7731      | Unhealthy <sup>e</sup>                       | NA | <ul style="list-style-type: none"> <li>• 1 [Reference]</li> </ul>                                                                                                                                                                                                | NA             |
|                                    |           | Sweet <sup>e</sup>                           | NA | <ul style="list-style-type: none"> <li>• HR: 0.90 (95% CI, 0.63-1.27); <i>P</i> = .55</li> </ul>                                                                                                                                                                 | NA             |
|                                    |           | Mediterranean-like <sup>e</sup>              | NA | <ul style="list-style-type: none"> <li>• HR: 0.81 (95% CI, 0.57-1.15); <i>P</i> = .23</li> </ul>                                                                                                                                                                 | NA             |
|                                    |           | Healthy <sup>e</sup>                         | NA | <ul style="list-style-type: none"> <li>• HR: 0.95 (95% CI, 0.74-1.22); <i>P</i> = .69</li> </ul>                                                                                                                                                                 | NA             |
| Granic et al, <sup>116</sup> 2013  | 12<br>830 | Moderate intake and starch diet <sup>e</sup> | NA | <ul style="list-style-type: none"> <li>• ACM<math>\geq</math>20+ y past baseline, HR: 1.09 (95% CI, 1.02-1.17); <i>P</i> = .01</li> <li>• ACM at follow-up 10+ y past baseline, HR: 1.05 (95% CI, 0.99-1.12); <i>P</i> = .13</li> </ul>                          | Race/ethnicity |

|                                  |      |                                                                         |    |                                                                                                                                                                                                                             |                |
|----------------------------------|------|-------------------------------------------------------------------------|----|-----------------------------------------------------------------------------------------------------------------------------------------------------------------------------------------------------------------------------|----------------|
|                                  |      | Moderate intake with low flour-based food diet <sup>e</sup> [reference] | NA | <ul style="list-style-type: none"> <li>• 1 [Reference]</li> </ul>                                                                                                                                                           |                |
|                                  |      | Meat and starch diet <sup>e</sup>                                       | NA | <ul style="list-style-type: none"> <li>• ACM<math>\geq</math>20+ y past baseline, HR: 1.07 (95% CI, 1.00-1.14); <i>P</i> = .054</li> <li>• ACM 10+ y past baseline, HR: 1.04 (95% CI, 0.98-1.11); <i>P</i> = .20</li> </ul> | NA             |
|                                  |      | Low meat intake diet <sup>e</sup>                                       | NA | <ul style="list-style-type: none"> <li>• ACM 10+ y past baseline, HR: 1.02 (95% CI, 0.96-1.08); <i>P</i> = .47</li> <li>• ACM 20+ y past baseline, HR: 1.03 (95% CI, 0.97-1.10); <i>P</i> = .39</li> </ul>                  | NA             |
| Hamer et al, <sup>117</sup> 2010 | 1017 | Mediterranean <sup>e</sup>                                              | NA | <ul style="list-style-type: none"> <li>• T1, 1 [Reference]</li> <li>• T2, HR: 0.81 (95% CI, 0.67-0.97)</li> <li>• T3, HR: 0.82 (95% CI, 0.68-1.00); <i>P</i> for trend = .04</li> </ul>                                     | Race/ethnicity |
|                                  |      | Health aware <sup>e</sup>                                               | NA | <ul style="list-style-type: none"> <li>• T1, 1 [Reference]</li> <li>• T2, HR: 1.04 (95% CI, 0.86-1.25)</li> <li>• T3, HR: 0.93 (95% CI, 0.76-1.13); <i>P</i> for trend = .53</li> </ul>                                     | NA             |
|                                  |      | Traditional <sup>e</sup>                                                | NA | <ul style="list-style-type: none"> <li>• T1, 1 [Reference]</li> <li>• T2, HR: 0.94 (95% CI, 0.78-1.15)</li> <li>• T3, HR: 1.15 (95% CI, 0.94-1.40); <i>P</i> for trend = .14</li> </ul>                                     | NA             |

|                                      |           |                            |    |                                                                                                                                                                                                                                                                                 |                                   |
|--------------------------------------|-----------|----------------------------|----|---------------------------------------------------------------------------------------------------------------------------------------------------------------------------------------------------------------------------------------------------------------------------------|-----------------------------------|
|                                      |           | Sweet and fat <sup>e</sup> | NA | <ul style="list-style-type: none"> <li>• T1, 1 [Reference]</li> <li>• T2, HR: 1.02 (95% CI, 0.84-1.24)</li> <li>• T3, HR: 0.93 (95% CI, 0.75-1.15);<br/>P for trend = .62</li> </ul>                                                                                            | NA                                |
| Heidemann et al, <sup>118</sup> 2008 | 72<br>113 | Prudent <sup>e</sup>       | NA | <ul style="list-style-type: none"> <li>• Q1, 1 [Reference]</li> <li>• Q2, RR: 0.85 (95% CI, 0.78-0.92)</li> <li>• Q3, RR: 0.84 (95% CI, 0.78-0.91)</li> <li>• Q4, RR: 0.81 (95% CI, 0.74-0.88)</li> <li>• Q5, RR: 0.83 (95% CI, 0.76-0.90);<br/>P for trend &lt;.001</li> </ul> | Race/ethnicity;<br>alcohol intake |
|                                      |           | Western <sup>e</sup>       | NA | <ul style="list-style-type: none"> <li>• Q1, 1 [Reference]</li> <li>• Q2, RR: 1.00 (95% CI, 0.92-1.08)</li> <li>• Q3, RR: 1.10 (95% CI, 1.02-1.20)</li> <li>• Q4, RR: 1.16 (95% CI, 1.06-1.26)</li> <li>• Q5, RR: 1.21 (95% CI, 1.21-1.32);<br/>P for trend &lt;.001</li> </ul> | NA                                |
| Hoffmann et al, <sup>119</sup> 2005  | 9356      | PCA Pattern 1              | NA | <ul style="list-style-type: none"> <li>• Per-SD increase, RR: 1.10 (95% CI, 0.96-1.28)</li> <li>• Q1, 1 [Reference]</li> <li>• Q2, RR: 0.82 (95% CI, 0.57-1.22)</li> <li>• Q3, RR: 1.00 (95% CI, 0.70-1.45)</li> <li>• Q4, RR: 1.03 (95% CI, 0.70-1.51)</li> </ul>              | Race/ethnicity                    |

|  |  |               |    |                                                                                                                                                                                                                                                                                                                                        |    |
|--|--|---------------|----|----------------------------------------------------------------------------------------------------------------------------------------------------------------------------------------------------------------------------------------------------------------------------------------------------------------------------------------|----|
|  |  |               |    | <ul style="list-style-type: none"> <li>• Q5, RR: 1.06 (95% CI, 0.68-1.65); P for trend = .50</li> </ul>                                                                                                                                                                                                                                |    |
|  |  | PCA Pattern 2 | NA | <ul style="list-style-type: none"> <li>• Per-SD increase, RR: 0.99 (95% CI, 0.89-1.10)</li> <li>• Q1, 1 [Reference]</li> <li>• Q2, RR: 0.91 (95% CI, 0.68-1.22)</li> <li>• Q3, RR: 0.90 (95% CI, 0.66-1.23)</li> <li>• Q4, RR: 1.10 (95% CI, 0.81-1.51)</li> <li>• Q5, RR: 0.80 (95% CI, 0.55-1.15); P for trend = .61</li> </ul>      | NA |
|  |  | RRR Pattern 1 | NA | <ul style="list-style-type: none"> <li>• Per-SD increase, RR: 1.20 (95% CI, 1.09-1.31)</li> <li>• Q1, 1 [Reference]</li> <li>• Q2, RR: 1.10 (95% CI, 0.70-1.46)</li> <li>• Q3, RR: 0.96 (95% CI, 0.66-1.38)</li> <li>• Q4, RR: 1.32 (95% CI, 0.95-1.85)</li> <li>• Q5, RR: 1.61 (95% CI, 1.17-2.21); P for trend = &lt;.001</li> </ul> | NA |
|  |  | RRR Pattern 2 | NA | <ul style="list-style-type: none"> <li>• Per-SD increase, RR: 0.96 (95% CI, 0.87-1.06)</li> <li>• Q1, 1 [Reference]</li> <li>• Q2, RR: 0.87 (95% CI, 0.63-1.21)</li> <li>• Q3, RR: 0.81 (95% CI, 0.57-1.13)</li> </ul>                                                                                                                 | NA |



|                                    |        |                                     |                              |                                                                                                                                                    |                                                          |
|------------------------------------|--------|-------------------------------------|------------------------------|----------------------------------------------------------------------------------------------------------------------------------------------------|----------------------------------------------------------|
|                                    |        |                                     |                              | <ul style="list-style-type: none"> <li>• Q4, RR:1.07 (95% CI, 0.78-1.48)</li> <li>• Q5, RR: 0.96 (95% CI, 0.70-1.33); P for trend = .74</li> </ul> |                                                          |
| Hsiao et al, <sup>120</sup> 2013   | 446    | Sweets and dairy <sup>e</sup>       | NA                           | <ul style="list-style-type: none"> <li>• OR: 1.02 (95% CI, 0.64-1.63)</li> </ul>                                                                   | Race/ethnicity; physical activity (n = 179 missing data) |
|                                    |        | Western <sup>e</sup>                | NA                           | <ul style="list-style-type: none"> <li>• OR: 0.95 (95% CI, 0.55-1.63)</li> </ul>                                                                   |                                                          |
|                                    |        | Health conscious <sup>e</sup>       | NA                           | <ul style="list-style-type: none"> <li>• 1 [Reference]</li> </ul>                                                                                  |                                                          |
| Krieger et al, <sup>121</sup> 2018 | 15 936 | Sausage and vegetables <sup>e</sup> | Female participants          | <ul style="list-style-type: none"> <li>• 1 [Reference]</li> </ul>                                                                                  | NA                                                       |
|                                    |        |                                     | Male participants            | <ul style="list-style-type: none"> <li>• 1 [Reference]</li> </ul>                                                                                  | NA                                                       |
|                                    |        |                                     | Female and male participants | <ul style="list-style-type: none"> <li>• 1 [Reference]</li> </ul>                                                                                  | NA                                                       |
|                                    |        | Meat and salad <sup>e</sup>         | Female participants          | <ul style="list-style-type: none"> <li>• HR: 0.93 (95% CI, 0.80-1.08)</li> </ul>                                                                   | NA                                                       |
|                                    |        |                                     | Male participants            | <ul style="list-style-type: none"> <li>• HR: 0.95 (95% CI, 0.85-1.07)</li> </ul>                                                                   | NA                                                       |
|                                    |        |                                     | Female and male participants | <ul style="list-style-type: none"> <li>• HR: 0.94 (95% CI, 0.86-1.03)</li> </ul>                                                                   | NA                                                       |
|                                    |        | Fish <sup>e</sup>                   | Female participants          | <ul style="list-style-type: none"> <li>• HR: 0.98 (95% CI, 0.83-1.15)</li> </ul>                                                                   | NA                                                       |
|                                    |        |                                     | Male participants            | <ul style="list-style-type: none"> <li>• HR: 0.82 (95% CI, 0.71-0.96)</li> </ul>                                                                   | NA                                                       |

|                                              |      |                              |                               |                                                                                                                                                                                                                         |                                                                                |
|----------------------------------------------|------|------------------------------|-------------------------------|-------------------------------------------------------------------------------------------------------------------------------------------------------------------------------------------------------------------------|--------------------------------------------------------------------------------|
|                                              |      |                              | Female and male participants  | <ul style="list-style-type: none"> <li>HR: 0.87 (95% CI, 0.78-0.97)</li> </ul>                                                                                                                                          | NA                                                                             |
|                                              |      | Traditional <sup>e</sup>     | Female participants           | <ul style="list-style-type: none"> <li>HR: 1.02 (95% CI, 0.87-1.19)</li> </ul>                                                                                                                                          | NA                                                                             |
|                                              |      |                              | Male participants             | <ul style="list-style-type: none"> <li>HR: 0.81 (95% CI, 0.71-0.93)</li> </ul>                                                                                                                                          | NA                                                                             |
|                                              |      |                              | Female and male participants  | <ul style="list-style-type: none"> <li>HR: 0.89 (95% CI, 0.80-0.98)</li> </ul>                                                                                                                                          | NA                                                                             |
|                                              |      |                              | High-fiber foods <sup>e</sup> | Female participants                                                                                                                                                                                                     | <ul style="list-style-type: none"> <li>HR: 0.91 (95% CI, 0.79-1.05)</li> </ul> |
|                                              |      | Male participants            |                               | <ul style="list-style-type: none"> <li>HR: 0.94 (95% CI, 0.83-1.08)</li> </ul>                                                                                                                                          | NA                                                                             |
|                                              |      | Female and male participants |                               | <ul style="list-style-type: none"> <li>HR: 0.92 (95% CI, 0.84-1.02)</li> </ul>                                                                                                                                          | NA                                                                             |
| Martínez-González et al, <sup>122</sup> 2015 | 7216 | Western <sup>e</sup>         | NA                            | <ul style="list-style-type: none"> <li>Q1, 1 [Reference]</li> <li>Q2, HR: 0.93 (95% CI, 0.66-1.3)</li> <li>Q3, HR: 1.05 (95% CI, 0.75-1.46)</li> <li>Q4, HR: 1.04 (95% CI, 0.74-1.47); P for trend = .65</li> </ul>     | Race/ethnicity                                                                 |
|                                              |      | Mediterranean <sup>e</sup>   | NA                            | <ul style="list-style-type: none"> <li>Q1, 1 [Reference]</li> <li>Q2, HR: 0.82 (95% CI, 0.62-1.10)</li> <li>Q3, HR: 0.74 (95% CI, 0.54-0.99)</li> <li>Q4, HR: 0.53 (95% CI, 0.38-0.75); P for trend &lt;.001</li> </ul> | NA                                                                             |

|                                    |      |                                  |    |                                                                                                                                                                                                                                  |                                          |
|------------------------------------|------|----------------------------------|----|----------------------------------------------------------------------------------------------------------------------------------------------------------------------------------------------------------------------------------|------------------------------------------|
| Masala et al, <sup>123</sup> 2007  | 5611 | Prudent <sup>e</sup>             | NA | <ul style="list-style-type: none"> <li>• Q1, 1 [Reference]</li> <li>• Q2, HR: 0.99 (95% CI, 0.63-1.54)</li> <li>• Q3, HR: 0.93 (95% CI, 0.58-1.51)</li> <li>• Q4, HR: 0.47 (95% CI, 0.47-1.53);<br/>P for trend = .59</li> </ul> | Race/ethnicity                           |
|                                    |      | Pasta and meat <sup>e</sup>      | NA | <ul style="list-style-type: none"> <li>• Q1, 1 [Reference]</li> <li>• Q2, HR: 1.07 (95% CI, 0.67-1.70)</li> <li>• Q3, HR: 0.99 (95% CI, 0.59-1.64)</li> <li>• Q4, HR: 1.37 (95% CI, 0.80-2.34);<br/>P for trend = .34</li> </ul> | NA                                       |
|                                    |      | Olive oil and salad <sup>e</sup> | NA | <ul style="list-style-type: none"> <li>• Q1, 1 [Reference]</li> <li>• Q2, HR: 0.78 (95% CI, 0.50-1.21)</li> <li>• Q3, HR: 0.76 (95% CI, 0.48-1.20)</li> <li>• Q4, HR: 0.50 (95% CI, 0.29-0.86);<br/>P for trend = .02</li> </ul> | NA                                       |
|                                    |      | Sweets and dairy <sup>e</sup>    | NA | <ul style="list-style-type: none"> <li>• Q1, 1 [Reference]</li> <li>• Q2, HR: 0.90 (95% CI, 0.56-1.45)</li> <li>• Q3, HR: 0.87 (95% CI, 0.52-1.45)</li> <li>• Q4, HR: 0.85 (95% CI, 0.85-2.54);<br/>P for trend = .25</li> </ul> | NA                                       |
| Menotti et al, <sup>124</sup> 2012 | 1221 | Factor 1 <sup>e</sup>            | NA | <ul style="list-style-type: none"> <li>• HR: 1.00 (95% CI, 0.94-1.06)</li> </ul>                                                                                                                                                 | Age;<br>race/ethnicity;<br>SES; physical |

|                                    |      |                                                     |    |                                                                                                                                                                                                                                                                                                                          |                                                                              |
|------------------------------------|------|-----------------------------------------------------|----|--------------------------------------------------------------------------------------------------------------------------------------------------------------------------------------------------------------------------------------------------------------------------------------------------------------------------|------------------------------------------------------------------------------|
|                                    |      |                                                     |    |                                                                                                                                                                                                                                                                                                                          | activity;<br>smoking status                                                  |
|                                    |      | Factor 2 <sup>e</sup>                               | NA | <ul style="list-style-type: none"> <li>HR: 0.89 (95% CI, 0.83-0.96); P value NR</li> </ul>                                                                                                                                                                                                                               |                                                                              |
|                                    |      | Factor 3 <sup>e</sup>                               | NA | <ul style="list-style-type: none"> <li>HR: 0.93 (95% CI, 0.97-1.00)</li> </ul>                                                                                                                                                                                                                                           |                                                                              |
| Menotti et al, <sup>125</sup> 2014 | 1564 | Factor 2 <sup>e</sup>                               | NA | <ul style="list-style-type: none"> <li>20 y follow-up, diet score 1, HR: 1.42 (95% CI, 1.18-1.71)</li> <li>40 y follow-up, diet score 1, HR: 1.31 (95% CI, 1.15-1.50)</li> <li>20 y follow-up, diet score 2, HR: 0.99 (95% CI, 0.81-1.21)</li> <li>40 y follow-up, diet score 2, HR: 0.98 (95% CI, 0.86-1.11)</li> </ul> | Race/ethnicity;<br>SES; physical activity;<br>anthropometry ; smoking status |
| Menotti et al, <sup>110</sup> 2016 | 1712 | Factor 2, <sup>e</sup> Q5 vs Q1 [reference: Q1]     | NA | <ul style="list-style-type: none"> <li>HR: 0.87; P &lt; .05</li> </ul>                                                                                                                                                                                                                                                   | Race/ethnicity;<br>SES; physical activity;<br>anthropometry ; smoking status |
|                                    |      | Non-Mediterranean diet <sup>e</sup> [reference: Q1] | NA | <ul style="list-style-type: none"> <li>1 [Reference]</li> </ul>                                                                                                                                                                                                                                                          |                                                                              |
|                                    |      | Prudent [Q2, Q3, and Q4]                            | NA | <ul style="list-style-type: none"> <li>Life-years gained, HR: 2.76 (95% CI, 1.48-4.04)</li> </ul>                                                                                                                                                                                                                        | NA                                                                           |
|                                    |      | Mediterranean diet <sup>e</sup> [reference: Q1]     | NA | <ul style="list-style-type: none"> <li>Life-years gained, HR: 4.36 (95% CI, 2.79-5.92)</li> </ul>                                                                                                                                                                                                                        | NA                                                                           |

|                                     |           |                                               |    |                                                                                                                                                                                                                                                                                 |     |
|-------------------------------------|-----------|-----------------------------------------------|----|---------------------------------------------------------------------------------------------------------------------------------------------------------------------------------------------------------------------------------------------------------------------------------|-----|
| Nanri et al, <sup>127</sup> 2017    | 81<br>720 | Prudent <sup>e</sup>                          | NA | <ul style="list-style-type: none"> <li>• Q1, 1 [Reference]</li> <li>• Q2, HR: 0.89 (95% CI, 0.84-0.94)</li> <li>• Q3, HR: 0.81 (95% CI, 0.77-0.85)</li> <li>• Q4, HR: 0.82 (95% CI, 0.77-0.86);<br/>P for trend &lt;.001</li> </ul>                                             | SES |
|                                     |           | Westernized <sup>e</sup>                      | NA | <ul style="list-style-type: none"> <li>• Q1, 1 [Reference]</li> <li>• Q2, HR: 0.93 (95% CI, 0.89-0.98)</li> <li>• Q3, HR: 0.88 (95% CI, 0.84-0.93)</li> <li>• Q4, HR: 0.91 (95% CI, 0.85-0.96);<br/>P for trend &lt;.001</li> </ul>                                             | NA  |
|                                     |           | Traditional Japanese <sup>e</sup>             | NA | <ul style="list-style-type: none"> <li>• Q1, 1 [Reference]</li> <li>• Q2, HR: 0.94 (95% CI, 0.89-1.0)</li> <li>• Q3, HR: 0.93 (95% CI, 0.87-0.99)</li> <li>• Q4, HR: 0.97 (95% CI, 0.91-1.03);<br/>P for trend = .49</li> </ul>                                                 | NA  |
| Odegaard et al, <sup>128</sup> 2014 | 52<br>584 | Vegetable-, fruit-, and soy-rich <sup>e</sup> | NA | <ul style="list-style-type: none"> <li>• Q1, 1 [Reference]</li> <li>• Q2, HR: 0.90 (95% CI, 0.84-0.94)</li> <li>• Q3, HR: 0.79 (95% CI, 0.74-0.84)</li> <li>• Q4, HR: 0.80 (95% CI, 0.75-0.85)</li> <li>• Q5, HR: 0.75 (95% CI, 0.70-0.80);<br/>P for trend &lt;.001</li> </ul> | NA  |

|                                    |       |                                       |    |                                                                                                                                                                                                                                                                             |                              |
|------------------------------------|-------|---------------------------------------|----|-----------------------------------------------------------------------------------------------------------------------------------------------------------------------------------------------------------------------------------------------------------------------------|------------------------------|
|                                    |       | Dim sum- and meat- rich <sup>e</sup>  | NA | <ul style="list-style-type: none"> <li>• Q1, 1 [Reference]</li> <li>• Q2, HR: 0.98 (95% CI, 0.92-1.04)</li> <li>• Q3, HR: 1.01 (95% CI, 0.95-1.08)</li> <li>• Q4, HR: 1.06 (95% CI, 0.99-1.13)</li> <li>• Q5, HR: 1.14 (95% CI, 1.06-1.23); P for trend &lt;.001</li> </ul> | NA                           |
| Waijers et al, <sup>129</sup> 2006 | 5427  | Mediterranean-like <sup>e</sup>       | NA | <ul style="list-style-type: none"> <li>• HR: 1.25 (95% CI, 0.52-0.95)</li> <li>• T1, 1 [Reference]</li> <li>• T2, HR: 0.91</li> <li>• T3, HR: 0.84</li> </ul>                                                                                                               | NA                           |
|                                    |       | Traditional Dutch dinner <sup>e</sup> | NA | <ul style="list-style-type: none"> <li>• T1, 1 [Reference]</li> <li>• T2, HR: 1.00</li> <li>• T3, HR: 1.25</li> </ul>                                                                                                                                                       | NA                           |
|                                    |       | Healthy traditional <sup>e</sup>      | NA | <ul style="list-style-type: none"> <li>• T1, 1 [Reference]</li> <li>• T2, HR: 0.81</li> </ul>                                                                                                                                                                               | NA                           |
| Zazpe et al, <sup>130</sup> 2014   | 16008 | Western <sup>e</sup>                  | NA | <ul style="list-style-type: none"> <li>• T1, 1 [Reference]</li> <li>• T2, HR: 0.94 (95% CI, 0.61-1.44)</li> <li>• T3, HR: 0.79 (95% CI, 0.45-1.38); P for trend = .40</li> </ul>                                                                                            | Race/ethnicity (all Spanish) |
|                                    |       | Mediterranean <sup>e</sup>            | NA | <ul style="list-style-type: none"> <li>• T1, 1 [Reference]</li> </ul>                                                                                                                                                                                                       | NA                           |

|                                      |            |                                  |    |                                                                                                                                                                                 |    |
|--------------------------------------|------------|----------------------------------|----|---------------------------------------------------------------------------------------------------------------------------------------------------------------------------------|----|
|                                      |            |                                  |    | <ul style="list-style-type: none"> <li>T2, HR: 0.72 (95% CI, 0.48-1.08)</li> <li>T3, HR: 0.53 (95% CI, 0.34-0.84);<br/>P for trend = .01</li> </ul>                             |    |
|                                      |            | Alcoholic beverages <sup>e</sup> | NA | <ul style="list-style-type: none"> <li>T1, 1 [Reference]</li> <li>T2, HR: 0.99 (95% CI, 0.64-1.56)</li> <li>T3, HR: 0.78 (95% CI, 0.48-1.27);<br/>P for trend = .27</li> </ul>  | NA |
| Zhao et al, <sup>131</sup> 2019      | 2949       | Meat-fat pattern <sup>e</sup>    | NA | <ul style="list-style-type: none"> <li>T1, 1 [Reference]</li> <li>T2, HR: 1.21 (95% CI, 0.86-1.69)</li> <li>T3, HR: 1.25 (95% CI, 0.84-1.88);<br/>P for trend = .27</li> </ul>  | NA |
|                                      |            | Healthy pattern <sup>e</sup>     | NA | <ul style="list-style-type: none"> <li>T1, 1 [Reference]</li> <li>T2, HR: 0.64 (95% CI, 0.47-0.88);<br/>P for trend = .051</li> <li>T3, HR: 0.74 (95% CI, 0.53-1.02)</li> </ul> | NA |
|                                      |            | Dairy-bread pattern <sup>e</sup> | NA | <ul style="list-style-type: none"> <li>T1, 1 [Reference]</li> <li>T2, HR: 0.95 (95% CI, 0.69-1.30)</li> <li>T3, HR: 1.34 (95% CI, 0.98-1.83);<br/>P for trend = .08</li> </ul>  | NA |
| Mihrshahi et al, <sup>132</sup> 2017 | 243<br>096 | Vegetarian <sup>e</sup>          | NA | <ul style="list-style-type: none"> <li>Vegetarian vs nonvegetarian, HR:<br/>1.16 (95% CI, 0.93-1.45)</li> </ul>                                                                 | NA |

|                                 |            |                                 |    |                                                                                                                                                                                                                                                                                                                                                                       |                        |
|---------------------------------|------------|---------------------------------|----|-----------------------------------------------------------------------------------------------------------------------------------------------------------------------------------------------------------------------------------------------------------------------------------------------------------------------------------------------------------------------|------------------------|
|                                 |            |                                 |    | <ul style="list-style-type: none"> <li>Vegetarian vs regular meat eater, HR: 1.16 (95% CI, 0.93-1.45)</li> <li>P for overall effect of diet category = .10</li> </ul>                                                                                                                                                                                                 |                        |
|                                 |            | Semivegetarian <sup>e</sup>     | NA | <ul style="list-style-type: none"> <li>HR: 1.12 (95% CI, 0.96-1.31)</li> </ul>                                                                                                                                                                                                                                                                                        | NA                     |
|                                 |            | Pescovegetarian <sup>e</sup>    | NA | <ul style="list-style-type: none"> <li>HR: 0.79 (95% CI, 0.59-1.06)</li> </ul>                                                                                                                                                                                                                                                                                        | NA                     |
|                                 |            | Regular meat eater <sup>e</sup> | NA | <ul style="list-style-type: none"> <li>1 [Reference]</li> </ul>                                                                                                                                                                                                                                                                                                       | NA                     |
| Song et al, <sup>133</sup> 2016 | 131<br>342 | Animal protein <sup>e</sup>     | NA | <ul style="list-style-type: none"> <li>≤10%, 1 [Reference]</li> <li>&gt;10% to ≤12%, HR: 1.01 (95% CI, 0.97-1.05)</li> <li>&gt;12% to ≤15%, HR: 1.03 (95% CI, 0.99-1.07)</li> <li>&gt;15% to ≤18%, HR: 1.03 (95% CI, 0.98-1.07)</li> <li>&gt;18%, HR: 1.03 (95% CI, 0.98-1.08)</li> <li>Per-10% increment, HR: 1.02 (95% CI, 0.98-1.05); P for trend = .33</li> </ul> | Race/ethnicity;<br>SES |
|                                 |            | Plant protein <sup>e</sup>      | NA | <ul style="list-style-type: none"> <li>≤3%, 1 [Reference]</li> <li>&gt;3% to ≤4%, HR: 0.97 (95% CI, 0.94-1.01)</li> </ul>                                                                                                                                                                                                                                             | NA                     |



|                                |           |                                                                                                                                                                                                                                                            |                                                                                                                                                                                                                      |                                                                                                                                                                                                                                                                               |                                                       |
|--------------------------------|-----------|------------------------------------------------------------------------------------------------------------------------------------------------------------------------------------------------------------------------------------------------------------|----------------------------------------------------------------------------------------------------------------------------------------------------------------------------------------------------------------------|-------------------------------------------------------------------------------------------------------------------------------------------------------------------------------------------------------------------------------------------------------------------------------|-------------------------------------------------------|
|                                |           |                                                                                                                                                                                                                                                            |                                                                                                                                                                                                                      | <ul style="list-style-type: none"> <li>• &gt;4% to ≤5%, HR: 0.95 (95% CI, 0.91-0.99)</li> <li>• &gt;5% to ≤6%, HR: 0.91 (95% CI, 0.86-0.96)</li> <li>• &gt;6%, HR: 0.89 (95% CI, 0.84-0.96)</li> <li>• Per-3% increment, HR: 0.90 (95% CI, 0.86-0.95); P &lt; .001</li> </ul> |                                                       |
| Key et al, <sup>134</sup> 2009 | 47<br>254 | <ul style="list-style-type: none"> <li>• Meat eater<sup>e</sup></li> <li>• Fish eater<sup>e</sup></li> <li>• Vegetarian, including vegan<sup>e</sup></li> <li>• Vegan<sup>e</sup></li> <li>• Nonvegetarian, including meat eater and fish eater</li> </ul> | NA                                                                                                                                                                                                                   | <ul style="list-style-type: none"> <li>• Full sample, SMR:</li> <li>• Nonvegetarian, SMR: 52 (50-54)</li> <li>• Vegetarian, SMR: 52 (48-56)</li> </ul>                                                                                                                        | Race/ethnicity; SES; physical activity; anthropometry |
|                                |           |                                                                                                                                                                                                                                                            | <ul style="list-style-type: none"> <li>• In those without previous disease,</li> <li>• Nonvegetarian, 1 [Reference]</li> <li>• Vegetarian, DRR: 1.05 (95% CI, 0.93-1.19)</li> <li>• Heterogeneity P = .44</li> </ul> |                                                                                                                                                                                                                                                                               |                                                       |
|                                |           |                                                                                                                                                                                                                                                            | <ul style="list-style-type: none"> <li>• Meat eater, 1 [Reference]</li> <li>• Fish eater, DRR: 0.89 (95% CI, 0.75-1.05)</li> <li>• Vegetarian or vegan, DRR: 1.03 (95% CI, 0.9-1.16)</li> </ul>                      |                                                                                                                                                                                                                                                                               |                                                       |
|                                |           |                                                                                                                                                                                                                                                            | <ul style="list-style-type: none"> <li>• Heterogeneity P = .28</li> </ul>                                                                                                                                            |                                                                                                                                                                                                                                                                               |                                                       |

|                                   |           |                                                                                                                                                                                                                                     |                     |                                                                                                                                                                                                                                                                                                                                                                        |    |
|-----------------------------------|-----------|-------------------------------------------------------------------------------------------------------------------------------------------------------------------------------------------------------------------------------------|---------------------|------------------------------------------------------------------------------------------------------------------------------------------------------------------------------------------------------------------------------------------------------------------------------------------------------------------------------------------------------------------------|----|
| Orlich et al, <sup>135</sup> 2013 | 73<br>308 | <ul style="list-style-type: none"> <li>• Nonvegetarian<sup>e</sup></li> <li>• Semivegetarian<sup>e</sup></li> <li>• Pescovegetarian<sup>e</sup></li> <li>• Lacto-ovo vegetarian<sup>e</sup></li> <li>• Vegan<sup>e</sup></li> </ul> | Female participants | <ul style="list-style-type: none"> <li>• Nonvegetarian, HR, 1 [Reference]</li> <li>• Vegan, HR: 0.97 (95% CI, 0.78-1.20)</li> <li>• Lacto-ovo vegetarian, HR: 0.94 (95% CI, 0.83-1.07)</li> <li>• Pescovegetarian, HR: 0.88 (95% CI, 0.72-1.07)</li> <li>• Semivegetarian, HR: 0.92 (95% CI, 0.70-1.22)</li> <li>• Vegetarian, HR: 0.93 (95% CI, 0.82-1.05)</li> </ul> | NA |
|                                   |           | <ul style="list-style-type: none"> <li>• Nonvegetarian<sup>e</sup></li> <li>• Semivegetarian<sup>e</sup></li> <li>• Pescovegetarian<sup>e</sup></li> <li>• Lacto-ovo vegetarian<sup>e</sup></li> </ul>                              | Male participants   | <ul style="list-style-type: none"> <li>• Nonvegetarian, 1 [Reference]</li> <li>• Vegan, HR: 0.72 (95% CI, 0.5-0.92)</li> <li>• Lacto-ovo vegetarian, HR: 0.86 (95% CI, 0.74-1.01)</li> <li>• Pescovegetarian, HR: 0.73 (95% CI, 0.57-0.93)</li> <li>• Semivegetarian, HR: 0.93 (95% CI, 0.68-1.26)</li> <li>• Vegetarian, HR: 0.82 (95% CI, 0.72-0.94)</li> </ul>      | NA |

|                                         |       |                                                                                                                                                                                                                                     |                              |                                                                                                                                                                                                                                                                                                                                                                    |                    |
|-----------------------------------------|-------|-------------------------------------------------------------------------------------------------------------------------------------------------------------------------------------------------------------------------------------|------------------------------|--------------------------------------------------------------------------------------------------------------------------------------------------------------------------------------------------------------------------------------------------------------------------------------------------------------------------------------------------------------------|--------------------|
|                                         |       | <ul style="list-style-type: none"> <li>• Vegan<sup>e</sup></li> </ul>                                                                                                                                                               |                              |                                                                                                                                                                                                                                                                                                                                                                    |                    |
|                                         |       | <ul style="list-style-type: none"> <li>• Nonvegetarian<sup>e</sup></li> <li>• Semivegetarian<sup>e</sup></li> <li>• Pescovegetarian<sup>e</sup></li> <li>• Lacto-ovo vegetarian<sup>e</sup></li> <li>• Vegan<sup>e</sup></li> </ul> | Female and male participants | <ul style="list-style-type: none"> <li>• Nonvegetarian, 1 [Reference]</li> <li>• Vegan, HR: 0.85 (95% CI, 0.73-1.01)</li> <li>• Lacto-ovo vegetarian, HR: 0.91 (95% CI, 0.82-1.00)</li> <li>• Pescovegetarian, HR: 0.81 (95% CI, 0.69-0.94)</li> <li>• Semivegetarian, HR: 0.92 (95% CI, 0.75-1.13)</li> <li>• Vegetarian, HR: 0.88 (95% CI, 0.80-0.97)</li> </ul> | NA                 |
| Chang-Claude et al, <sup>136</sup> 2005 | 1724  | <ul style="list-style-type: none"> <li>• Vegetarian<sup>e</sup></li> <li>• Lacto-ovo vegetarian<sup>e</sup></li> <li>• Nonvegetarian<sup>e</sup></li> </ul>                                                                         | NA                           | <ul style="list-style-type: none"> <li>• Vegetarian, SMR: 62 (56-69)</li> <li>• Nonvegetarian, SMR: 52 (44-61)</li> </ul>                                                                                                                                                                                                                                          | NA                 |
|                                         |       |                                                                                                                                                                                                                                     |                              | <ul style="list-style-type: none"> <li>• Nonvegetarian, 1 [Reference]</li> <li>• Vegetarian, RR: 1.10 (95% CI, 0.89-1.36)</li> </ul>                                                                                                                                                                                                                               |                    |
| Héroux et al, <sup>137</sup> 2010       | 13621 | RRR                                                                                                                                                                                                                                 | NA                           | <ul style="list-style-type: none"> <li>• Q1, 1 [Reference]</li> <li>• Q2, HR: 1.05 (95% CI, 0.80-1.37)</li> </ul>                                                                                                                                                                                                                                                  | Anthropometry; SES |

|                                       |           |                             |    |                                                                                                                                                                                                                                 |                                 |
|---------------------------------------|-----------|-----------------------------|----|---------------------------------------------------------------------------------------------------------------------------------------------------------------------------------------------------------------------------------|---------------------------------|
|                                       |           |                             |    | <ul style="list-style-type: none"> <li>• Q3, HR: 1.03 (95% CI, 0.78-1.36)</li> <li>• Q4, HR: 0.96 (95% CI, 0.70-1.31)</li> <li>• Q5, HR: 1.18 (95% CI, 0.86-1.64)</li> </ul>                                                    |                                 |
| Meyer et al, <sup>138</sup> 2011      | 981       | RRR                         | NA | <ul style="list-style-type: none"> <li>• RRR, HR: 1.16 (95% CI, 1.0-1.33); P = .046</li> </ul>                                                                                                                                  | Race/ethnicity                  |
|                                       |           | PLS                         | NA | <ul style="list-style-type: none"> <li>• PLS, HR: 1.18 (95% CI, 1.02-1.37); P = .03</li> </ul>                                                                                                                                  |                                 |
|                                       |           | PCR                         | NA | <ul style="list-style-type: none"> <li>• PCR, HR: 1.16 (95% CI, 1.00-1.35); P = .054</li> </ul>                                                                                                                                 |                                 |
| Schnabel et al, <sup>139</sup> 2019   | 44<br>551 | Ultraprocessed <sup>e</sup> | NA | <ul style="list-style-type: none"> <li>• Per-10% increment, HR: 1.14 (95% CI, 1.0-1.27); P for trend = .008</li> </ul>                                                                                                          | Race/ethnicity                  |
| Kim et al, <sup>140</sup> 2019        | 11<br>898 | Ultraprocessed <sup>e</sup> | NA | <ul style="list-style-type: none"> <li>• Q1, 1 [Reference]</li> <li>• Q2, HR: 0.99 (95% CI, 0.83-1.18)</li> <li>• Q3, HR: 1.06 (95% CI, 0.87-1.30)</li> <li>• Q4, HR: 1.30 (95% CI, 1.08-1.57); P for trend &lt;.001</li> </ul> | NA                              |
| Rico-Campà et al, <sup>141</sup> 2019 | 19<br>899 | Ultraprocessed <sup>e</sup> | NA | <ul style="list-style-type: none"> <li>• Low, 1 [Reference]</li> <li>• High, HR: 1.62 (95% CI, 1.13-2.33); P for trend = .005</li> <li>• Medium-low, HR: 1.06 (95% CI, 0.76-1.48)</li> </ul>                                    | Race/ethnicity<br>(all Spanish) |

|  |  |  |  |                                                                                               |  |
|--|--|--|--|-----------------------------------------------------------------------------------------------|--|
|  |  |  |  | <ul style="list-style-type: none"> <li>• Medium-high, HR: 1.38 (95% CI, 0.99-1.92)</li> </ul> |  |
|--|--|--|--|-----------------------------------------------------------------------------------------------|--|

Abbreviations: ACM, all-cause mortality; ADI, area deprivation index; AHEI, alternative healthy eating index; AICR, American Institute for Cancer Research; AIDI, anti-inflammatory diet index; aMED, alternate Mediterranean diet score; aMED-e, energy-standardized aMED; arMED, adapted relative Mediterranean diet score; BMI, body mass index; CVD, cardiovascular disease; DALY, disability-adjusted life years; DASH, Dietary Approaches to Stop Hypertension; DBS, dietary behavior score; DHD, Dutch Healthy Diet; DHD-I, Dutch Healthy Diet index; DHNaFS, Dutch Healthy Nutrient and Food Score; DQI, Diet Quality Index; DQI-I, DQI-International; DQI-K, DQI for Koreans; DQI-SNR, DQI-Swedish Nutrition Recommendations; DRR, death rate ratio; DS, DASH score; DST, dietary screening tool; DUNaFS, Dutch Undesirable Nutrient and Food Score; HALE, Healthy Aging: a Longitudinal Study in Europe; HEI, Healthy Eating Index; HLI, healthy lifestyle index; HNFI, Healthy Nordic Food Index; hPDI, healthful plant-based diet index; HR, hazard ratio; ITT, intention to treat; MAI, Mediterranean Adequacy Index; MDS, Mediterranean diet score; MEDAS, Mediterranean Diet Adherence Screener; MedDietScore, Mediterranean-based diet score; mMDS, modified MDS; MRR, mortality rate ratio; NA, not applicable or not available; NR, not reported; NRFS, nonrecommended food score; OR, odds ratio; PAF, population attributable fraction; PAR, population attributable risk; PCA, principal component analysis; PCR, principal components regression; PD, percentile difference; PDI, plant-based diet index; PLS, partial least squares regression; PyrMDS, Mediterranean Diet Pyramid Score; Q, quintile or quartile; R, correlation coefficient; RFBS, recommended food and behavior score; RFS, recommended food score; RR, relative risk or risk ratio; RRR, reduced rank regression; SES, socioeconomic status; SMR, standardized mortality ratio; uPDI, unhealthful PDI; WCRF, World Cancer Research Fund.

<sup>b</sup>Adapted from the 2020 Dietary Guidelines Advisory Committee and Nutrition Evidence Systematic Review Team.<sup>142</sup>

<sup>c</sup>Analytic sample size.

<sup>d</sup>Key confounders are identified in Figure 1. This table lists any key confounders that were not accounted for either by design or by analysis to further illustrate that most studies accounted for most key confounders. All key confounders or other factors considered that were adjusted for in each study are included in the tables from the complete review that is available online.<sup>142</sup>

<sup>e</sup>The name or label of the dietary pattern was assigned by the authors of the article.

## eReferences

1. Estruch R, Ros E, Salas-Salvadó J, et al; PREDIMED Study Investigators. Primary prevention of cardiovascular disease with a Mediterranean diet supplemented with extra-virgin olive oil or nuts. *N Engl J Med*. 2018;378(25):e34.
2. Abe S, Zhang S, Tomata Y, Tsuduki T, Sugawara Y, Tsuji I. Japanese diet and survival time: the Ohsaki cohort 1994 study. *Clin Nutr*. 2020;39(1):298-303.
3. Akbaraly TN, Ferrie JE, Berr C, et al. Alternative Healthy Eating Index and mortality over 18 y of follow-up: results from the Whitehall II cohort. *Am J Clin Nutr*. 2011;94(1):247-253.
4. Al Rifai M, Greenland P, Blaha MJ, et al. Factors of health in the protection against death and cardiovascular disease among adults with subclinical atherosclerosis. *Am Heart J*. 2018;198:180-188.
5. Atkins JL, Whincup PH, Morris RW, Lennon LT, Papacosta O, Wannamethee SG. High diet quality is associated with a lower risk of cardiovascular disease and all-cause mortality in older men. *J Nutr*. 2014;144(5):673-680.
6. Baden MY, Liu G, Satija A, et al. Changes in plant-based diet quality and total and cause-specific mortality. *Circulation*. 2019;140(12):979-991.
7. Behrens G, Fischer B, Kohler S, Park Y, Hollenbeck AR, Leitzmann MF. Healthy lifestyle behaviors and decreased risk of mortality in a large prospective study of U.S. women and men. *Eur J Epidemiol*. 2013;28(5):361-372.
8. Bellavia A, Tektonidis TG, Orsini N, Wolk A, Larsson SC. Quantifying the benefits of Mediterranean diet in terms of survival. *Eur J Epidemiol*. 2016;31(5):527-530.
9. Biesbroek S, Verschuren WMM, Boer JMA, et al. Does a better adherence to dietary guidelines reduce mortality risk and environmental impact in the Dutch sub-cohort of the European Prospective Investigation into Cancer and Nutrition? *Br J Nutr*. 2017;118(1):69-80.
10. Bittoni MA, Wexler R, Spees CK, Clinton SK, Taylor CA. Lack of private health insurance is associated with higher mortality from cancer and other chronic diseases, poor diet quality, and inflammatory biomarkers in the United States. *Prev Med*. 2015;81:420-426.

11. Bo S, Ponzio V, Goitre I, et al. Predictive role of the Mediterranean diet on mortality in individuals at low cardiovascular risk: a 12-year follow-up population-based cohort study. *J Transl Med*. 2016;14:91.
12. Boggs DA, Ban Y, Palmer JR, Rosenberg L. Higher diet quality is inversely associated with mortality in African-American women. *J Nutr*. 2015;145(3):547-554.
13. Bonaccio M, Di Castelnuovo A, Costanzo S, et al. Mediterranean diet and mortality in the elderly: a prospective cohort study and a meta-analysis. *Br J Nutr*. 2018;120(8):841-854.
14. Bongard V, Arveiler D, Dallongeville J, et al. Food groups associated with a reduced risk of 15-year all-cause death. *Eur J Clin Nutr*. 2016;70(6):715-722.
15. Booth JN III, Colantonio LD, Howard G, et al. Healthy lifestyle factors and incident heart disease and mortality in candidates for primary prevention with statin therapy. *Int J Cardiol*. 2016;207:196-202.
16. Brown JC, Harhay MO, Harhay MN. Physical activity, diet quality, and mortality among community-dwelling prefrail and frail older adults. *J Nutr Gerontol Geriatr*. 2016;35(4):253-266.
17. Buckland G, Agudo A, Travier N, et al. Adherence to the Mediterranean diet reduces mortality in the Spanish cohort of the European Prospective Investigation into Cancer and Nutrition (EPIC-Spain). *Br J Nutr*. 2011;106(10):1581-1591.
18. Cárdenas-Fuentes G, Subirana I, Martínez-González MA, et al. Multiple approaches to associations of physical activity and adherence to the Mediterranean diet with all-cause mortality in older adults: the Prevención con Dieta Mediterránea study. *Eur J Nutr*. 2019;58(4):1569-1578.
19. Chan RSM, Yu BWM, Leung J, et al. How dietary patterns are related to inflammaging and mortality in community-dwelling older Chinese adults in Hong Kong - a prospective analysis. *J Nutr Health Aging*. 2019;23(2):181-194.
20. Cheng E, Um CY, Prizment A, Lazovich D, Bostick RM. Associations of evolutionary-concordance diet, Mediterranean diet and evolutionary-concordance lifestyle pattern scores with all-cause and cause-specific mortality. *Br J Nutr*. 2018;1-10.

21. Chrysohoou C, Pitsavos C, Lazaros G, Skoumas J, Tousoulis D, Stefanadis C; Ikaria Study Investigators. Determinants of all-cause mortality and incidence of cardiovascular disease (2009 to 2013) in older adults: the Ikaria Study of the Blue Zones. *Angiology*. 2016;67(6):541-548.
22. Cuenca-García M, Artero EG, Sui X, Lee DC, Hebert JR, Blair SN. Dietary indices, cardiovascular risk factors and mortality in middle-aged adults: findings from the Aerobics Center Longitudinal Study. *Ann Epidemiol*. 2014;24(4):297-303.e2.
23. Dai J, Krasnow RE, Reed T. Midlife moderation-quantified healthy diet and 40-year mortality risk from CHD: the prospective National Heart, Lung, and Blood Institute Twin Study. *Br J Nutr*. 2016;116(2):326-334.
24. Drake I, Gullberg B, Sonestedt E, et al. Scoring models of a diet quality index and the predictive capability of mortality in a population-based cohort of Swedish men and women. *Public Health Nutr*. 2013;16(3):468-478.
25. Ford ES, Zhao G, Tsai J, Li C. Low-risk lifestyle behaviors and all-cause mortality: findings from the National Health and Nutrition Examination Survey III Mortality Study. *Am J Public Health*. 2011;101(10):1922-1929.
26. Ford ES, Bergmann MM, Boeing H, Li C, Capewell S. Healthy lifestyle behaviors and all-cause mortality among adults in the United States. *Prev Med*. 2012;55(1):23-27.
27. Ford DW, Hartman TJ, Still C, et al. Body mass index, poor diet quality, and health-related quality of life are associated with mortality in rural older adults. *J Nutr Gerontol Geriatr*. 2014;33(1):23-34.
28. Fresán U, Sabaté J, Martínez-Gonzalez MA, Segovia-Siapco G, de la Fuente-Arrillaga C, Bes-Rastrollo M. Adherence to the 2015 Dietary Guidelines for Americans and mortality risk in a Mediterranean cohort: the SUN project. *Prev Med*. 2019;118:317-324.
29. George SM, Ballard-Barbash R, Manson JE, et al. Comparing indices of diet quality with chronic disease mortality risk in postmenopausal women in the Women's Health Initiative Observational Study: evidence to inform national dietary guidance. *Am J Epidemiol*. 2014;180(6):616-625.
30. Harmon BE, Boushey CJ, Shvetsov YB, et al. Associations of key diet-quality indexes with mortality in the multiethnic



- cohort: the Dietary Patterns Methods Project. *Am J Clin Nutr*. 2015;101(3):587-597.
31. Hashemian M, Farvid MS, Poustchi H, et al. The application of six dietary scores to a Middle Eastern population: a comparative analysis of mortality in a prospective study. *Eur J Epidemiol*. 2019;34(4):371-382.
  32. Haveman-Nies A, de Groot L, Burema J, Cruz JA, Osler M, van Staveren WA; SENECA Investigators. Dietary quality and lifestyle factors in relation to 10-year mortality in older Europeans: the SENECA study. *Am J Epidemiol*. 2002;156(10):962-968.</jrn>
  33. Hodge AM, English DR, Itsiopoulos C, O'Dea K, Giles GG. Does a Mediterranean diet reduce the mortality risk associated with diabetes: evidence from the Melbourne collaborative cohort study. *Nutr Metab Cardiovasc Dis*. 2011;21(9):733-739.
  34. Hodge AM, Bassett JK, Dugué PA, et al. Dietary inflammatory index or Mediterranean diet score as risk factors for total and cardiovascular mortality. *Nutr Metab Cardiovasc Dis*. 2018;28(5):461-469.
  35. Hu EA, Steffen LM, Coresh J, Appel LJ, Rebholz CM. Adherence to the Healthy Eating Index-2015 and other dietary patterns may reduce risk of cardiovascular disease, cardiovascular mortality, and all-cause mortality. *J Nutr*. 2020;150(2):312-321.
  36. Hulsege G, Looman M, Smit HA, Daviglius ML, van der Schouw YT, Verschuren WM. Lifestyle changes in young adulthood and middle age and risk of cardiovascular disease and all-cause mortality: the Doetinchem cohort study. *J Am Heart Assoc*. 2016;5(1):e002432.
  37. Kaluza J, Håkansson N, Brzozowska A, Wolk A. Diet quality and mortality: a population-based prospective study of men. *Eur J Clin Nutr*. 2009;63(4):451-457.
  38. Kaluza J, Håkansson N, Harris HR, Orsini N, Michaëlsson K, Wolk A. Influence of anti-inflammatory diet and smoking on mortality and survival in men and women: two prospective cohort studies. *J Intern Med*. 2019;285(1):75-91.
  39. Kant AK, Schatzkin A, Graubard BI, Schairer C. A prospective study of diet quality and mortality in women. *JAMA*. 2000;283(16):2109-2115.

40. Kant AK, Graubard BI, Schatzkin A. Dietary patterns predict mortality in a national cohort: the National Health Interview Surveys, 1987 and 1992. *J Nutr.* 2004;134(7):1793-1799.
41. Kant AK, Leitzmann MF, Park Y, Hollenbeck A, Schatzkin A. Patterns of recommended dietary behaviors predict subsequent risk of mortality in a large cohort of men and women in the United States. *J Nutr.* 2009;139(7):1374-1380.
42. Kappeler R, Eichholzer M, Rohrmann S. Meat consumption and diet quality and mortality in NHANES III. *Eur J Clin Nutr.* 2013;67(6):598-606.
43. Kim JY, Ko YJ, Rhee CW, et al. Cardiovascular health metrics and all-cause and cardiovascular disease mortality among middle-aged men in Korea: the Seoul male cohort study. *J Prev Med Public Health.* 2013;46(6):319-328.
44. Kim H, Caulfield LE, Rebholz CM. Healthy plant-based diets are associated with lower risk of all-cause mortality in US adults. *J Nutr.* 2018;148(4):624-631.
45. Kim H, Caulfield LE, Garcia-Larsen V, Steffen LM, Coresh J, Rebholz CM. Plant-based diets are associated with a lower risk of incident cardiovascular disease, cardiovascular disease mortality, and all-cause mortality in a general population of middle-aged adults. *J Am Heart Assoc.* 2019;8(16):e012865.
46. Knoops KT, de Groot LC, Kromhout D, et al. Mediterranean diet, lifestyle factors, and 10-year mortality in elderly European men and women: the HALE project. *JAMA.* 2004;292(12):1433-1439.
47. Knoops KT, Groot de LC, Fidanza F, Alberti-Fidanza A, Kromhout D, van Staveren WA. Comparison of three different dietary scores in relation to 10-year mortality in elderly European subjects: the HALE project. *Eur J Clin Nutr.* 2006;60(6):746-755.
48. Kurotani K, Akter S, Kashino I, et al; Japan Public Health Center based Prospective Study Group. Quality of diet and mortality among Japanese men and women: Japan Public Health Center based prospective study. *BMJ.* 2016;352:i1209.
49. Kurotani K, Honjo K, Nakaya T, et al; Japan Public Health Center-based Prospective Study Group. Diet quality affects the association between census-based neighborhood

- deprivation and all-cause mortality in Japanese men and women: the Japan Public Health Center-Based Prospective Study. *Nutrients*. 2019;11(9):E2194.
50. Lagiou P, Trichopoulos D, Sandin S, et al. Mediterranean dietary pattern and mortality among young women: a cohort study in Sweden. *Br J Nutr*. 2006;96(2):384-392.
  51. Lasheras C, Fernandez S, Patterson AM. Mediterranean diet and age with respect to overall survival in institutionalized, nonsmoking elderly people. *Am J Clin Nutr*. 2000;71(4):987-992.
  52. Lassale C, Gunter MJ, Romaguera D, et al. Diet quality scores and prediction of all-cause, cardiovascular and cancer mortality in a Pan-European cohort study. *PLoS One*. 2016;11(7):e0159025.
  53. Lim J, Lee Y, Shin S, et al. An association between Diet Quality Index for Koreans (DQI-K) and total mortality in Health Examinees Gem (HEXA-G) study. *Nutr Res Pract*. 2018;12(3):258-264.
  54. Limongi F, Noale M, Gesmundo A, Crepaldi G, Maggi S. Adherence to the Mediterranean diet and all-cause mortality risk in an elderly Italian population: data from the ILSA Study. *J Nutr Health Aging*. 2017;21(5):505-513.
  55. Liu YH, Gao X, Mitchell DC, Wood GC, Still CD, Jensen GL. Diet quality is associated with mortality in adults aged 80 years and older: a prospective study. *J Am Geriatr Soc*. 2019;67(10):2180-2185.
  56. Loprinzi PD, Addoh O, Mann JR. Association between dietary behavior and mortality among American adults with mobility limitations. *Disabil Health J*. 2018;11(1):126-129.
  57. Mai V, Kant AK, Flood A, Lacey JV Jr, Schairer C, Schatzkin A. Diet quality and subsequent cancer incidence and mortality in a prospective cohort of women. *Int J Epidemiol*. 2005;34(1):54-60.
  58. Martínez-Gómez D, Guallar-Castillón P, León-Muñoz LM, López-García E, Rodríguez-Artalejo F. Combined impact of traditional and non-traditional health behaviors on mortality: a national prospective cohort study in Spanish older adults. *BMC Med*. 2013;11:47.
  59. Martínez-González MA, Guillén-Grima F, De Irala J, et al. The Mediterranean diet is associated with a reduction in

- premature mortality among middle-aged adults. *J Nutr.* 2012;142(9):1672-1678.
60. Martínez-González MA, Sánchez-Tainta A, Corella D, et al; PREDIMED Group. A provegetarian food pattern and reduction in total mortality in the Prevención con Dieta Mediterránea (PREDIMED) study. *Am J Clin Nutr.* 2014;100(suppl 1):320S-328S.
  61. McCullough ML, Patel AV, Kushi LH, et al. Following cancer prevention guidelines reduces risk of cancer, cardiovascular disease, and all-cause mortality. *Cancer Epidemiol Biomarkers Prev.* 2011;20(6):1089-1097.
  62. McNaughton SA, Bates CJ, Mishra GD. Diet quality is associated with all-cause mortality in adults aged 65 years and older. *J Nutr.* 2012;142(2):320-325.
  63. Menotti A, Alberti-Fidanza A, Fidanza F, Lanti M, Fruttini D. Factor analysis in the identification of dietary patterns and their predictive role in morbid and fatal events. *Public Health Nutr.* 2012;15(7):1232-1239.
  64. Menotti A, Kromhout D, Puddu PE, et al. Baseline fatty acids, food groups, a diet score and 50-year all-cause mortality rates: an ecological analysis of the Seven Countries Study. *Ann Med.* 2017;49(8):718-727.
  65. Michels KB, Wolk A. A prospective study of variety of healthy foods and mortality in women. *Int J Epidemiol.* 2002;31(4):847-854.
  66. Mitrou PN, Kipnis V, Thiébaud AC, et al. Mediterranean dietary pattern and prediction of all-cause mortality in a US population: results from the NIH-AARP Diet and Health Study. *Arch Intern Med.* 2007;167(22):2461-2468.
  67. Mokhtari Z, Sharafkhah M, Poustchi H, et al. Adherence to the Dietary Approaches to Stop Hypertension (DASH) diet and risk of total and cause-specific mortality: results from the Golestan cohort study. *Int J Epidemiol.* 2019;48(6):1824-1838.
  68. Muller DC, Murphy N, Johansson M, et al. Modifiable causes of premature death in middle-age in Western Europe: results from the EPIC cohort study. *BMC Med.* 2016;14:87.
  69. Mursu J, Steffen LM, Meyer KA, Duprez D, Jacobs DR Jr. Diet quality indexes and mortality in postmenopausal women: the Iowa Women's Health Study. *Am J Clin Nutr.* 2013;98(2):444-453.

70. Nakamura Y, Ueshima H, Okamura T, et al; National Integrated Project for Prospective Observation of Non-Communicable Diseases and its Trends in the Aged, 1980 Research Group. A Japanese diet and 19-year mortality: national integrated project for prospective observation of non-communicable diseases and its trends in the aged, 1980. *Br J Nutr.* 2009;101(11):1696-1705.
71. Neelakantan N, Koh WP, Yuan JM, van Dam RM. Diet-quality indexes are associated with a lower risk of cardiovascular, respiratory, and all-cause mortality among Chinese adults. *J Nutr.* 2018;148(8):1323-1332.
72. Nilsson LM, Winkvist A, Brustad M, et al. A traditional Sami diet score as a determinant of mortality in a general northern Swedish population. *Int J Circumpolar Health.* 2012;71(0):1-12.
73. Oba S, Nagata C, Nakamura K, et al. Diet based on the Japanese Food Guide Spinning Top and subsequent mortality among men and women in a general Japanese population. *J Am Diet Assoc.* 2009;109(9):1540-1547.</jrn>
74. Okada E, Nakamura K, Ukawa S, et al. The Japanese food score and risk of all-cause, CVD and cancer mortality: the Japan collaborative cohort study. *Br J Nutr.* 2018;120(4):464-471.
75. Olsen A, Egeberg R, Halkjær J, Christensen J, Overvad K, Tjønneland A. Healthy aspects of the Nordic diet are related to lower total mortality. *J Nutr.* 2011;141(4):639-644.
76. Osler M, Heitmann BL, Høidrup S, Jørgensen LM, Schroll M. Food intake patterns, self rated health and mortality in Danish men and women: a prospective observational study. *J Epidemiol Community Health.* 2001;55(6):399-403.
77. Panizza CE, Shvetsov YB, Harmon BE, et al. Testing the predictive validity of the Healthy Eating Index-2015 in the multiethnic cohort: is the score associated with a reduced risk of all-cause and cause-specific mortality? *Nutrients.* 2018;10(4):E452.
78. Park YM, Steck SE, Fung TT, et al. Mediterranean diet and mortality risk in metabolically healthy obese and metabolically unhealthy obese phenotypes. *Int J Obes (Lond).* 2016;40(10):1541-1549.

79. Park YM, Fung TT, Steck SE, et al. Diet quality and mortality risk in metabolically obese normal-weight adults. *Mayo Clin Proc.* 2016;91(10):1372-1383.
80. Prinelli F, Yannakoulia M, Anastasiou CA, et al. Mediterranean diet and other lifestyle factors in relation to 20-year all-cause mortality: a cohort study in an Italian population. *Br J Nutr.* 2015;113(6):1003-1011.
81. Reedy J, Krebs-Smith SM, Miller PE, et al. Higher diet quality is associated with decreased risk of all-cause, cardiovascular disease, and cancer mortality among older adults. *J Nutr.* 2014;144(6):881-889.
82. Roswall N, Sandin S, Löf M, et al. Adherence to the Healthy Nordic Food Index and total and cause-specific mortality among Swedish women. *Eur J Epidemiol.* 2015;30(6):509-517.
83. Seymour JD, Calle EE, Flagg EW, Coates RJ, Ford ES, Thun MJ; American Cancer Society. Diet quality index as a predictor of short-term mortality in the American Cancer Society Cancer Prevention Study II nutrition cohort. *Am J Epidemiol.* 2003;157(11):980-988.
84. Shah NS, Leonard D, Finley CE, et al. Dietary patterns and long-term survival: a retrospective study of healthy primary care patients. *Am J Med.* 2018;131(1):48-55.
85. Shahar DR, Yu B, Houston DK, et al; Health, Aging and Body Composition Study. Dietary factors in relation to daily activity energy expenditure and mortality among older adults. *J Nutr Health Aging.* 2009;13(5):414-420.
86. Shivappa N, Hebert JR, Kivimaki M, Akbaraly T. Alternative Healthy Eating Index 2010, Dietary Inflammatory Index and risk of mortality: results from the Whitehall II cohort study and meta-analysis of previous Dietary Inflammatory Index and mortality studies. *Br J Nutr.* 2017;118(3):210-221.
87. Shvetsov YB, Harmon BE, Ettienne R, et al. The influence of energy standardisation on the alternate Mediterranean diet score and its association with mortality in the multiethnic cohort. *Br J Nutr.* 2016;116(9):1592-1601.
88. Sijtsma FP, Soedamah-Muthu SS, de Hoon SE, Jacobs DR Jr, Kromhout D. Healthy eating and survival among elderly men with and without cardiovascular-metabolic diseases. *Nutr Metab Cardiovasc Dis.* 2015;25(12):1117-1124.

89. Sjögren P, Becker W, Warensjö E, et al. Mediterranean and carbohydrate-restricted diets and mortality among elderly men: a cohort study in Sweden. *Am J Clin Nutr*. 2010;92(4):967-974.
90. Sotos-Prieto M, Bhupathiraju SN, Mattei J, et al. Association of changes in diet quality with total and cause-specific mortality. *N Engl J Med*. 2017;377(2):143-153.
91. Stefler D, Malyutina S, Kubinova R, et al. Mediterranean diet score and total and cardiovascular mortality in Eastern Europe: the HAPIEE Study. *Eur J Nutr*. 2017;56(1):421-429.
92. Struijk EA, Beulens JW, May AM, et al. Dietary patterns in relation to disease burden expressed in disability-adjusted life years. *Am J Clin Nutr*. 2014;100(4):1158-1165.
93. Thorpe RJ Jr, Wilson-Frederick SM, Bowie JV, et al. Health behaviors and all-cause mortality in African American men. *Am J Mens Health*. 2013;7(4 suppl):8S-18S.
94. Tognon G, Rothenberg E, Eiben G, Sundh V, Winkvist A, Lissner L. Does the Mediterranean diet predict longevity in the elderly? A Swedish perspective. *Age (Dordr)*. 2011;33(3):439-450.
95. Tognon G, Nilsson LM, Lissner L, et al. The Mediterranean diet score and mortality are inversely associated in adults living in the subarctic region. *J Nutr*. 2012;142(8):1547-1553.
96. Tognon G, Lissner L, Sæbye D, Walker KZ, Heitmann BL. The Mediterranean diet in relation to mortality and CVD: a Danish cohort study. *Br J Nutr*. 2014;111(1):151-159.
97. Tong TY, Wareham NJ, Khaw KT, Imamura F, Forouhi NG. Prospective association of the Mediterranean diet with cardiovascular disease incidence and mortality and its population impact in a non-Mediterranean population: the EPIC-Norfolk Study. *BMC Med*. 2016;14(1):135.
98. Trichopoulou A, Costacou T, Bamia C, Trichopoulos D. Adherence to a Mediterranean diet and survival in a Greek population. *N Engl J Med*. 2003;348(26):2599-2608.
99. Trichopoulou A, Orfanos P, Norat T, et al. Modified Mediterranean diet and survival: EPIC-elderly prospective cohort study. *BMJ*. 2005;330(7498):991.

100. Trichopoulou A, Bamia C, Trichopoulos D. Anatomy of health effects of Mediterranean diet: Greek EPIC prospective cohort study. *BMJ*. 2009;338:b2337.
101. van Dam RM, Li T, Spiegelman D, Franco OH, Hu FB. Combined impact of lifestyle factors on mortality: prospective cohort study in US women. *BMJ*. 2008;337:a1440.
102. van den Brandt PA. The impact of a Mediterranean diet and healthy lifestyle on premature mortality in men and women. *Am J Clin Nutr*. 2011;94(3):913-920.
103. van Lee L, Geelen A, Kieft-de Jong JC, et al. Adherence to the Dutch dietary guidelines is inversely associated with 20-year mortality in a large prospective cohort study. *Eur J Clin Nutr*. 2016;70(2):262-268.
104. Voortman T, Kieft-de Jong JC, Ikram MA, et al. Adherence to the 2015 Dutch dietary guidelines and risk of non-communicable diseases and mortality in the Rotterdam study. *Eur J Epidemiol*. 2017;32(11):993-1005.
105. Vormund K, Braun J, Rohrmann S, Bopp M, Ballmer P, Faeh D. Mediterranean diet and mortality in Switzerland: an alpine paradox? *Eur J Nutr*. 2015;54(1):139-148.
106. Wahlqvist ML, Darmadi-Blackberry I, Kouris-Blazos A, et al. Does diet matter for survival in long-lived cultures? *Asia Pac J Clin Nutr*. 2005;14(1):2-6.
107. Warensjö Lemming E, Byberg L, Wolk A, Michaëlsson K. A comparison between two healthy diet scores, the modified Mediterranean diet score and the Healthy Nordic Food Index, in relation to all-cause and cause-specific mortality. *Br J Nutr*. 2018;119(7):836-846.
108. Whalen KA, Judd S, McCullough ML, Flanders WD, Hartman TJ, Bostick RM. Paleolithic and Mediterranean diet pattern scores are inversely associated with all-cause and cause-specific mortality in adults. *J Nutr*. 2017;147(4):612-620.
109. Yu D, Sonderman J, Buchowski MS, et al. Healthy eating and risks of total and cause-specific death among low-income populations of African-Americans and other adults in the southeastern United States: a prospective cohort study. *PLoS Med*. 2015;12(5):e1001830.
110. Zaslavsky O, Zelber-Sagi S, Hebert JR, et al. Biomarker-calibrated nutrient intake and healthy diet index associations with mortality risks among older and frail



- women from the Women's Health Initiative. *Am J Clin Nutr.* 2017;105(6):1399-1407.
111. Zaslavsky O, Zelber-Sagi S, Shikany JM, et al. Anatomy of the Mediterranean diet and mortality among older women with frailty. *J Nutr Gerontol Geriatr.* 2018;37(3-4):269-281.
  112. Anderson AL, Harris TB, Tylavsky FA, et al; Health ABC Study. Dietary patterns and survival of older adults. *J Am Diet Assoc.* 2011;111(1):84-91.
  113. Atkins JL, Whincup PH, Morris RW, Lennon LT, Papacosta O, Wannamethee SG. Dietary patterns and the risk of CVD and all-cause mortality in older British men. *Br J Nutr.* 2016;116(7):1246-1255.
  114. Bamia C, Trichopoulos D, Ferrari P, et al. Dietary patterns and survival of older Europeans: the EPIC-Elderly Study (European Prospective Investigation into Cancer and Nutrition). *Public Health Nutr.* 2007;10(6):590-598.
  115. Brunner EJ, Mosdøl A, Witte DR, et al. Dietary patterns and 15-y risks of major coronary events, diabetes, and mortality. *Am J Clin Nutr.* 2008;87(5):1414-1421.
  116. Granic A, Andel R, Dahl AK, Gatz M, Pedersen NL. Midlife dietary patterns and mortality in the population-based study of Swedish twins. *J Epidemiol Community Health.* 2013;67(7):578-586.
  117. Hamer M, McNaughton SA, Bates CJ, Mishra GD. Dietary patterns, assessed from a weighed food record, and survival among elderly participants from the United Kingdom. *Eur J Clin Nutr.* 2010;64(8):853-861.
  118. Heidemann C, Schulze MB, Franco OH, van Dam RM, Mantzoros CS, Hu FB. Dietary patterns and risk of mortality from cardiovascular disease, cancer, and all causes in a prospective cohort of women. *Circulation.* 2008;118(3):230-237.
  119. Hoffmann K, Boeing H, Boffetta P, et al. Comparison of two statistical approaches to predict all-cause mortality by dietary patterns in German elderly subjects. *Br J Nutr.* 2005;93(5):709-716.
  120. Hsiao PY, Mitchell DC, Coffman DL, et al. Dietary patterns and relationship to obesity-related health outcomes and mortality in adults 75 years of age or greater. *J Nutr Health Aging.* 2013;17(6):566-572.

121. Krieger JP, Cabaset S, Pestoni G, Rohrmann S, Faeh D; Swiss National Cohort Study Group. Dietary patterns are associated with cardiovascular and cancer mortality among Swiss adults in a census-linked cohort. *Nutrients*. 2018;10(3):E313.
122. Martínez-González MA, Zazpe I, Razquin C, et al; PREDIMED GROUP. Empirically-derived food patterns and the risk of total mortality and cardiovascular events in the PREDIMED study. *Clin Nutr*. 2015;34(5):859-867.
123. Masala G, Ceroti M, Pala V, et al. A dietary pattern rich in olive oil and raw vegetables is associated with lower mortality in Italian elderly subjects. *Br J Nutr*. 2007;98(2):406-415.
124. Menotti A, Alberti-Fidanza A, Fidanza F. The association of the Mediterranean Adequacy Index with fatal coronary events in an Italian middle-aged male population followed for 40 years. *Nutr Metab Cardiovasc Dis*. 2012;22(4):369-375.
125. Menotti A, Puddu PE, Lanti M, Maiani G, Catasta G, Fidanza AA. Lifestyle habits and mortality from all and specific causes of death: 40-year follow-up in the Italian Rural Areas of the Seven Countries Study. *J Nutr Health Aging*. 2014;18(3):314-321.
126. Menotti A, Puddu PE, Maiani G, Catasta G. Cardiovascular and other causes of death as a function of lifestyle habits in a quasi extinct middle-aged male population. A 50-year follow-up study. *Int J Cardiol*. 2016;210:173-178.
127. Nanri A, Mizoue T, Shimazu T, et al; Japan Public Health Center-Based Prospective Study Group. Dietary patterns and all-cause, cancer, and cardiovascular disease mortality in Japanese men and women: the Japan public health center-based prospective study. *PLoS One*. 2017;12(4):e0174848.
128. Odegaard AO, Koh WP, Yuan JM, Gross MD, Pereira MA. Dietary patterns and mortality in a Chinese population. *Am J Clin Nutr*. 2014;100(3):877-883.
129. Waijers PM, Ocké MC, van Rossum CT, et al. Dietary patterns and survival in older Dutch women. *Am J Clin Nutr*. 2006;83(5):1170-1176.
130. Zazpe I, Sánchez-Tainta A, Toledo E, Sánchez-Villegas A, Martínez-González MA. Dietary patterns and total mortality

- in a Mediterranean cohort: the SUN project. *J Acad Nutr Diet.* 2014;114(1):37-47.
131. Zhao W, Ukawa S, Okada E, et al. The associations of dietary patterns with all-cause mortality and other lifestyle factors in the elderly: an age-specific prospective cohort study. *Clin Nutr.* 2019;38(1):288-296.
  132. Mahrshahi S, Ding D, Gale J, Allman-Farinelli M, Banks E, Bauman AE. Vegetarian diet and all-cause mortality: evidence from a large population-based Australian cohort - the 45 and Up Study. *Prev Med.* 2017;97:1-7.
  133. Song M, Fung TT, Hu FB, et al. Association of animal and plant protein intake with all-cause and cause-specific mortality. *JAMA Intern Med.* 2016;176(10):1453-1463.
  134. Key TJ, Appleby PN, Spencer EA, Travis RC, Roddam AW, Allen NE. Mortality in British vegetarians: results from the European Prospective Investigation into Cancer and Nutrition (EPIC-Oxford). *Am J Clin Nutr.* 2009;89(5):1613S-1619S.
  135. Orlich MJ, Singh PN, Sabaté J, et al. Vegetarian dietary patterns and mortality in Adventist Health Study 2. *JAMA Intern Med.* 2013;173(13):1230-1238.
  136. Chang-Claude J, Hermann S, Eilber U, Steindorf K. Lifestyle determinants and mortality in German vegetarians and health-conscious persons: results of a 21-year follow-up. *Cancer Epidemiol Biomarkers Prev.* 2005;14(4):963-968.
  137. Héroux M, Janssen I, Lam M, et al. Dietary patterns and the risk of mortality: impact of cardiorespiratory fitness. *Int J Epidemiol.* 2010;39(1):197-209.
  138. Meyer J, Döring A, Herder C, Roden M, Koenig W, Thorand B. Dietary patterns, subclinical inflammation, incident coronary heart disease and mortality in middle-aged men from the MONICA/KORA Augsburg cohort study. *Eur J Clin Nutr.* 2011;65(7):800-807.
  139. Schnabel L, Kesse-Guyot E, Allès B, et al. Association between ultraprocessed food consumption and risk of mortality among middle-aged adults in France. *JAMA Intern Med.* 2019;179(4):490-498.
  140. Kim H, Hu EA, Rebholz CM. Ultra-processed food intake and mortality in the USA: results from the Third National Health and Nutrition Examination Survey (NHANES III, 1988-1994). *Public Health Nutr.* 2019;22(10):1777-1785.

141. Rico-Campà A, Martínez-González MA, Alvarez-Alvarez I, et al. Association between consumption of ultra-processed foods and all cause mortality: SUN prospective cohort study. *BMJ*. 2019;365:1949.
142. US Department of Agriculture. Nutrition Evidence Systematic Review. Systematic review question: what is the relationship between dietary patterns consumed and all-cause mortality? Conclusion statement. Accessed July 27, 2021. <https://nesr.usda.gov/2020-dietary-guidelines-advisory-committee-systematic-reviews>
